# Supplementary material for: Direct allylic C–H alkylation of enol silyl ethers enabled by photoredox–Brønsted base hybrid catalysis
Source: PubMed Central journal article supplement (PMC6586846; doi:10.1038/s41467-019-10641-y), 2019-06-20
Supplement: 41467_2019_10641_MOESM2_ESM.pdf [file 41467_2019_10641_MOESM2_ESM.pdf]

Description of Additional Supplementary Files

File Name: Supplementary Data 1

Description: Cartesian Coordinates
