# Supplementary material for: Direct allylic C–H alkylation of enol silyl ethers enabled by photoredox–Brønsted base hybrid catalysis
Source: PubMed Central journal article supplement (PMC6586846; doi:10.1038/s41467-019-10641-y), 2019-06-20
Supplement: 41467_2019_10641_MOESM3_ESM.pdf [file 41467_2019_10641_MOESM3_ESM.pdf]

## Supplementary Data 1

### Cartesian Coordinates

[1a]<sup>++</sup>

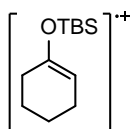

SMD(MeCN)-CAM-B3LYP/6-311+G(d,p)

E = -836.178439

Zero-point correction = 0.337261 (Hartree/Particle)

Thermal correction to Energy = 0.355667

Thermal correction to Enthalpy = 0.356611

Thermal correction to Gibbs Free Energy = 0.290805

Sum of electronic and zero-point Energies = -835.841178

Sum of electronic and thermal Energies = -835.822772

Sum of electronic and thermal Enthalpies = -835.821828

Sum of electronic and thermal Free Energies = -835.887634

|    |           |           |           |
|----|-----------|-----------|-----------|
| O  | 0.182372  | -0.371406 | -0.005165 |
| Si | -1.249740 | 0.680022  | 0.026894  |
| C  | -1.122744 | 1.739197  | -1.492018 |
| H  | -2.048480 | 2.307168  | -1.623153 |
| H  | -0.303931 | 2.458741  | -1.416714 |
| H  | -0.971107 | 1.136455  | -2.390333 |
| C  | -1.140657 | 1.623224  | 1.622092  |
| H  | -2.075046 | 2.165450  | 1.793926  |
| H  | -0.979026 | 0.957687  | 2.473228  |
| H  | -0.333149 | 2.359024  | 1.600849  |
| C  | -2.640369 | -0.589100 | -0.029847 |
| C  | 2.096161  | 1.008622  | 0.043995  |
| H  | 1.488100  | 1.901932  | 0.128788  |
| C  | 1.458143  | -0.252294 | -0.008380 |
| C  | 2.248114  | -1.509410 | -0.087994 |
| C  | 3.701717  | -1.330820 | 0.345576  |
| C  | 3.559736  | 1.153694  | 0.031975  |
| H  | 3.834542  | 1.485159  | 1.048360  |
| C  | 4.319019  | -0.117377 | -0.338552 |
| H  | 1.726997  | -2.277455 | 0.487001  |
| H  | 2.202885  | -1.826157 | -1.139196 |
| H  | 4.257957  | -2.237072 | 0.102395  |
| H  | 3.746082  | -1.205759 | 1.431768  |
| H  | 5.367233  | -0.006645 | -0.057879 |
| H  | 4.287576  | -0.255584 | -1.423548 |
| H  | 3.823495  | 2.003933  | -0.606228 |
| C  | -2.563284 | -1.404468 | -1.328336 |
| H  | -1.622733 | -1.955618 | -1.411595 |
| H  | -3.377371 | -2.137242 | -1.350243 |
| H  | -2.665393 | -0.772745 | -2.214580 |
| C  | -2.549315 | -1.534808 | 1.176097  |
| H  | -3.366474 | -2.263347 | 1.134880  |
| H  | -1.610348 | -2.094459 | 1.188142  |

|   |           |           |           |
|---|-----------|-----------|-----------|
| H | -2.635407 | -0.997849 | 2.124544  |
| C | -3.982868 | 0.160996  | 0.016056  |
| H | -4.107340 | 0.836736  | -0.834812 |
| H | -4.805188 | -0.561686 | -0.017762 |
| H | -4.098407 | 0.745539  | 0.932979  |

SMD(MeCN)-B3LYP/6-311+G(d,p)

E = -836.512677

Zero-point correction = 0.333587 (Hartree/Particle)

Thermal correction to Energy = 0.352370

Thermal correction to Enthalpy = 0.353314

Thermal correction to Gibbs Free Energy = 0.286217

Sum of electronic and zero-point Energies = -836.179090

Sum of electronic and thermal Energies = -836.160307

Sum of electronic and thermal Enthalpies = -836.159363

Sum of electronic and thermal Free Energies = -836.226460

|    |           |           |           |
|----|-----------|-----------|-----------|
| O  | 0.187289  | -0.372640 | 0.000730  |
| Si | -1.257279 | 0.681349  | 0.039071  |
| C  | -1.125686 | 1.777295  | -1.467101 |
| H  | -2.057184 | 2.338464  | -1.595422 |
| H  | -0.313729 | 2.502755  | -1.364286 |
| H  | -0.956089 | 1.195250  | -2.377106 |
| C  | -1.150038 | 1.612337  | 1.653976  |
| H  | -2.070084 | 2.184938  | 1.810688  |
| H  | -1.025672 | 0.935913  | 2.503991  |
| H  | -0.316117 | 2.320155  | 1.650070  |
| C  | -2.659404 | -0.595245 | -0.041592 |
| C  | 2.113456  | 1.010935  | 0.025082  |
| H  | 1.506575  | 1.906548  | 0.098069  |
| C  | 1.470815  | -0.252455 | -0.010581 |
| C  | 2.262847  | -1.515459 | -0.081921 |
| C  | 3.723292  | -1.336755 | 0.353867  |
| C  | 3.579929  | 1.156648  | 0.010163  |
| H  | 3.855506  | 1.512456  | 1.020965  |

|   |           |           |           |
|---|-----------|-----------|-----------|
| C | 4.349435  | -0.122945 | -0.335314 |
| H | 1.742049  | -2.282708 | 0.496803  |
| H | 2.220390  | -1.841336 | -1.132245 |
| H | 4.277792  | -2.246284 | 0.113399  |
| H | 3.765901  | -1.209655 | 1.441042  |
| H | 5.394231  | -0.006818 | -0.039719 |
| H | 4.334871  | -0.271056 | -1.420560 |
| H | 3.844625  | 1.998540  | -0.642129 |
| C | -2.579777 | -1.398974 | -1.356119 |
| H | -1.643692 | -1.959495 | -1.438275 |
| H | -3.402286 | -2.123555 | -1.394638 |
| H | -2.667974 | -0.755116 | -2.236340 |
| C | -2.580134 | -1.560822 | 1.159114  |
| H | -3.405236 | -2.281560 | 1.106170  |
| H | -1.645948 | -2.130196 | 1.166927  |
| H | -2.664781 | -1.034617 | 2.114709  |
| C | -4.004142 | 0.166482  | 0.007972  |
| H | -4.120538 | 0.855761  | -0.834244 |
| H | -4.832074 | -0.551002 | -0.039745 |
| H | -4.120503 | 0.738611  | 0.933767  |

SMD(MeCN)-LC-BLYP/6-311+G(d,p)

E = -834.627552

Zero-point correction = 0.341890 (Hartree/Particle)

Thermal correction to Energy = 0.359975

Thermal correction to Enthalpy = 0.360919

Thermal correction to Gibbs Free Energy = 0.295962

Sum of electronic and zero-point Energies = -834.285662

Sum of electronic and thermal Energies = -834.267577

Sum of electronic and thermal Enthalpies = -834.266633

Sum of electronic and thermal Free Energies = -834.331589

|    |           |           |           |
|----|-----------|-----------|-----------|
| O  | 0.177573  | -0.368950 | -0.007457 |
| Si | -1.242217 | 0.674503  | 0.027164  |
| C  | -1.117591 | 1.724317  | -1.479384 |
| H  | -2.045270 | 2.285488  | -1.615490 |
| H  | -0.304665 | 2.448886  | -1.405525 |
| H  | -0.960319 | 1.119808  | -2.374198 |
| C  | -1.136021 | 1.600511  | 1.614582  |
| H  | -2.076503 | 2.125454  | 1.798653  |
| H  | -0.959072 | 0.929565  | 2.457036  |
| H  | -0.341319 | 2.348305  | 1.596487  |
| C  | -2.617083 | -0.583056 | -0.031325 |
| C  | 2.075954  | 1.004553  | 0.047708  |
| H  | 1.466123  | 1.896946  | 0.135177  |
| C  | 1.444645  | -0.251695 | -0.006445 |
| C  | 2.231284  | -1.499851 | -0.082863 |
| C  | 3.674657  | -1.316435 | 0.344459  |
| C  | 3.532586  | 1.149278  | 0.033811  |
| H  | 3.808322  | 1.469515  | 1.050971  |
| C  | 4.280438  | -0.113442 | -0.346439 |
| H  | 1.710587  | -2.264285 | 0.495399  |
| H  | 2.182429  | -1.817206 | -1.132055 |
| H  | 4.233367  | -2.221815 | 0.108653  |

|   |           |           |           |
|---|-----------|-----------|-----------|
| H | 3.721622  | -1.181567 | 1.428462  |
| H | 5.332286  | -0.004239 | -0.083324 |
| H | 4.231906  | -0.253943 | -1.429580 |
| H | 3.794775  | 2.001271  | -0.599592 |
| C | -2.529718 | -1.393984 | -1.318170 |
| H | -1.585194 | -1.937454 | -1.395964 |
| H | -3.337290 | -2.131874 | -1.342627 |
| H | -2.632353 | -0.764635 | -2.204952 |
| C | -2.523712 | -1.517425 | 1.168583  |
| H | -3.334271 | -2.251338 | 1.127526  |
| H | -1.581045 | -2.069154 | 1.184531  |
| H | -2.616220 | -0.978445 | 2.114279  |
| C | -3.951887 | 0.156462  | 0.007887  |
| H | -4.075989 | 0.828271  | -0.844999 |
| H | -4.771070 | -0.567836 | -0.025597 |
| H | -4.071698 | 0.743448  | 0.921661  |

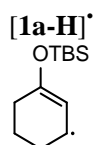

SMD(MeCN)-CAM-B3LYP/6-311+G(d,p)

E = -835.738437

Zero-point correction = 0.323989 (Hartree/Particle)

Thermal correction to Energy = 0.342274

Thermal correction to Enthalpy = 0.343218

Thermal correction to Gibbs Free Energy = 0.276740

Sum of electronic and zero-point Energies = -835.414448

Sum of electronic and thermal Energies = -835.396163

Sum of electronic and thermal Enthalpies = -835.395219

Sum of electronic and thermal Free Energies = -835.461696

|    |           |           |           |
|----|-----------|-----------|-----------|
| O  | 0.186288  | -0.408740 | -0.008075 |
| Si | -1.159846 | 0.621028  | 0.029024  |
| C  | -1.121306 | 1.744846  | -1.463929 |
| H  | -2.033156 | 2.347345  | -1.513126 |
| H  | -0.275908 | 2.436247  | -1.424663 |
| H  | -1.047389 | 1.175532  | -2.394202 |
| C  | -1.134751 | 1.612118  | 1.613858  |
| H  | -2.083968 | 2.138052  | 1.752822  |
| H  | -0.976847 | 0.971242  | 2.485045  |
| H  | -0.342800 | 2.365230  | 1.602166  |
| C  | -2.625006 | -0.580895 | -0.026626 |
| C  | 2.136764  | 1.025024  | 0.047650  |
| H  | 1.523428  | 1.912282  | 0.164047  |
| C  | 1.525258  | -0.215088 | -0.029983 |
| C  | 2.328505  | -1.470410 | -0.166860 |
| C  | 3.754587  | -1.285742 | 0.355923  |
| C  | 3.514213  | 1.170482  | -0.036754 |
| H  | 3.952094  | 2.161285  | -0.001556 |
| C  | 4.403539  | -0.022955 | -0.215516 |
| H  | 1.821058  | -2.274826 | 0.372902  |
| H  | 2.350297  | -1.773474 | -1.222814 |
| H  | 4.356228  | -2.165886 | 0.117494  |
| H  | 3.722943  | -1.204200 | 1.447306  |
| H  | 5.374420  | 0.150393  | 0.257224  |
| H  | 4.613348  | -0.176769 | -1.284322 |
| C  | -2.546576 | -1.452043 | -1.287915 |
| H  | -1.628235 | -2.043962 | -1.315950 |
| H  | -3.392338 | -2.149436 | -1.314654 |
| H  | -2.587876 | -0.853079 | -2.202257 |
| C  | -3.940142 | 0.213710  | -0.050289 |
| H  | -4.791713 | -0.476305 | -0.070220 |
| H  | -4.055346 | 0.847655  | 0.833550  |
| H  | -4.018221 | 0.852481  | -0.934627 |
| C  | -2.609696 | -1.486784 | 1.212937  |
| H  | -2.707116 | -0.913346 | 2.139128  |
| H  | -3.448668 | -2.191700 | 1.173370  |
| H  | -1.689040 | -2.072815 | 1.276631  |

SMD(MeCN)-B3LYP/6-311+G(d,p)

E = -836.069976  
 Zero-point correction = 0.320483 (Hartree/Particle)  
 Thermal correction to Energy = 0.339130  
 Thermal correction to Enthalpy = 0.340074  
 Thermal correction to Gibbs Free Energy = 0.272430  
 Sum of electronic and zero-point Energies = -835.749493  
 Sum of electronic and thermal Energies = -835.730847  
 Sum of electronic and thermal Enthalpies = -835.729902  
 Sum of electronic and thermal Free Energies = -835.797546

|    |           |           |           |
|----|-----------|-----------|-----------|
| O  | -0.190502 | -0.402794 | -0.062986 |
| Si | 1.167983  | 0.628320  | -0.029823 |
| C  | 1.084241  | 1.716681  | 1.500540  |
| H  | 2.018712  | 2.274130  | 1.624428  |
| H  | 0.274057  | 2.447927  | 1.425006  |
| H  | 0.922579  | 1.126990  | 2.407896  |
| C  | 1.193522  | 1.679931  | -1.587647 |
| H  | 2.108990  | 2.279497  | -1.630261 |
| H  | 1.151988  | 1.065698  | -2.492226 |
| H  | 0.346677  | 2.372494  | -1.612210 |
| C  | 2.638421  | -0.590218 | 0.033172  |
| C  | -2.156803 | 1.029040  | -0.064498 |
| H  | -1.548484 | 1.919692  | -0.187691 |
| C  | -1.534571 | -0.213409 | -0.008801 |
| C  | -2.333282 | -1.477077 | 0.134244  |
| C  | -3.780198 | -1.294196 | -0.352146 |
| C  | -3.537289 | 1.171099  | 0.048377  |
| H  | -3.977946 | 2.162064  | 0.028313  |
| C  | -4.423699 | -0.028029 | 0.236728  |
| H  | -1.838514 | -2.276935 | -0.426759 |
| H  | -2.327238 | -1.794016 | 1.188186  |
| H  | -4.372800 | -2.177603 | -0.097838 |
| H  | -3.777278 | -1.212943 | -1.445170 |
| H  | -5.403977 | 0.144793  | -0.220485 |
| H  | -4.619254 | -0.187287 | 1.309482  |
| C  | 2.573667  | -1.436231 | 1.321659  |
| H  | 1.652602  | -2.024165 | 1.376913  |
| H  | 3.416995  | -2.138448 | 1.352456  |
| H  | 2.631733  | -0.816464 | 2.222063  |
| C  | 3.962301  | 0.204920  | 0.020293  |
| H  | 4.813359  | -0.486783 | 0.064142  |
| H  | 4.074878  | 0.802428  | -0.889962 |
| H  | 4.047173  | 0.879760  | 0.878198  |
| C  | 2.606103  | -1.529862 | -1.190065 |
| H  | 2.680378  | -0.978493 | -2.132825 |
| H  | 3.453797  | -2.226420 | -1.150621 |
| H  | 1.689361  | -2.125938 | -1.220762 |

SMD(MeCN)-LC-BLYP/6-311+G(d,p)

E = -834.192332  
 Zero-point correction = 0.328356 (Hartree/Particle)  
 Thermal correction to Energy = 0.346367  
 Thermal correction to Enthalpy = 0.347311  
 Thermal correction to Gibbs Free Energy = 0.281633

Sum of electronic and zero-point Energies = -833.863976  
 Sum of electronic and thermal Energies = -833.845965  
 Sum of electronic and thermal Enthalpies = -833.845021  
 Sum of electronic and thermal Free Energies = -833.910699

|    |           |           |           |
|----|-----------|-----------|-----------|
| O  | 0.182920  | -0.413888 | -0.008004 |
| Si | -1.152244 | 0.611164  | 0.029711  |
| C  | -1.111568 | 1.724485  | -1.451551 |
| H  | -2.020899 | 2.328357  | -1.499534 |
| H  | -0.265093 | 2.412579  | -1.415400 |
| H  | -1.041831 | 1.152958  | -2.379267 |
| C  | -1.127758 | 1.588666  | 1.605089  |
| H  | -2.083056 | 2.098135  | 1.753202  |
| H  | -0.955146 | 0.944713  | 2.469555  |
| H  | -0.348045 | 2.352339  | 1.592806  |
| C  | -2.606478 | -0.572918 | -0.027933 |
| C  | 2.113766  | 1.018717  | 0.050105  |
| H  | 1.496011  | 1.902443  | 0.167475  |
| C  | 1.514297  | -0.217689 | -0.027937 |
| C  | 2.318702  | -1.461785 | -0.164853 |
| C  | 3.731772  | -1.269300 | 0.357606  |
| C  | 3.483317  | 1.168728  | -0.037330 |
| H  | 3.918471  | 2.160327  | -0.004202 |
| C  | 4.369513  | -0.016864 | -0.220061 |
| H  | 1.812116  | -2.266542 | 0.372405  |
| H  | 2.342698  | -1.760651 | -1.220230 |
| H  | 4.338275  | -2.147411 | 0.129776  |
| H  | 3.696395  | -1.177755 | 1.446950  |
| H  | 5.343234  | 0.160576  | 0.241645  |
| H  | 4.566583  | -0.171836 | -1.289211 |
| C  | -2.514139 | -1.450472 | -1.269558 |
| H  | -1.596077 | -2.041588 | -1.278747 |
| H  | -3.359083 | -2.146466 | -1.299792 |
| H  | -2.542946 | -0.861050 | -2.189442 |
| C  | -3.908345 | 0.219856  | -0.074031 |
| H  | -4.761439 | -0.466117 | -0.091696 |
| H  | -4.028307 | 0.866234  | 0.799003  |
| H  | -3.975266 | 0.845732  | -0.967255 |
| C  | -2.602718 | -1.457141 | 1.212916  |
| H  | -2.712893 | -0.873313 | 2.129911  |
| H  | -3.437099 | -2.165209 | 1.171902  |
| H  | -1.680706 | -2.037353 | 1.293454  |

[10]<sup>++</sup>

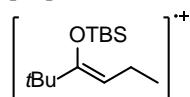

SMD(MeCN)-CAM-B3LYP/6-311+G(d,p)

E = -915.967760

Zero-point correction = 0.412084 (Hartree/Particle)

Thermal correction to Energy = 0.435736

Thermal correction to Enthalpy = 0.436680

Thermal correction to Gibbs Free Energy = 0.358766

Sum of electronic and zero-point Energies = -915.555676  
Sum of electronic and thermal Energies = -915.532023  
Sum of electronic and thermal Enthalpies = -915.531079  
Sum of electronic and thermal Free Energies = -915.608993

|    |           |           |           |
|----|-----------|-----------|-----------|
| C  | 1.230196  | 2.525194  | 0.222698  |
| C  | 2.024894  | 1.298513  | 0.062941  |
| H  | 3.101168  | 1.395446  | -0.000306 |
| C  | 1.495917  | -0.015239 | 0.010715  |
| O  | 0.242223  | -0.204632 | 0.156175  |
| C  | 1.928272  | 3.773130  | -0.309365 |
| H  | 2.091103  | 3.701726  | -1.386799 |
| H  | 1.317258  | 4.656280  | -0.117463 |
| H  | 2.896809  | 3.918829  | 0.173643  |
| Si | -1.396273 | -0.192185 | 0.773077  |
| C  | -1.563103 | 1.245843  | 1.934669  |
| H  | -2.504777 | 1.141736  | 2.482737  |
| H  | -0.757056 | 1.251434  | 2.672833  |
| H  | -1.576147 | 2.208508  | 1.422165  |
| C  | -1.545080 | -1.808129 | 1.673037  |
| H  | -2.565105 | -1.922069 | 2.053013  |
| H  | -1.327958 | -2.663357 | 1.030607  |
| H  | -0.871084 | -1.838401 | 2.532939  |
| C  | -2.467178 | -0.063219 | -0.775882 |
| H  | 0.239037  | 2.403564  | -0.217562 |
| H  | 1.054187  | 2.638353  | 1.305436  |
| C  | -3.925059 | 0.081581  | -0.302563 |
| H  | -4.587500 | 0.132661  | -1.173384 |
| H  | -4.250122 | -0.768472 | 0.304411  |
| H  | -4.078404 | 0.993827  | 0.280497  |
| C  | -2.087560 | 1.165516  | -1.613064 |
| H  | -2.173666 | 2.095056  | -1.044148 |
| H  | -1.068086 | 1.097346  | -2.001471 |
| H  | -2.761453 | 1.244183  | -2.473257 |
| C  | -2.339528 | -1.326273 | -1.638276 |
| H  | -1.319446 | -1.474148 | -2.001388 |
| H  | -2.638933 | -2.226057 | -1.094852 |
| H  | -2.991451 | -1.238487 | -2.514382 |
| C  | 2.356905  | -1.243128 | -0.198398 |
| C  | 2.473431  | -1.931528 | 1.178211  |
| C  | 1.661135  | -2.184861 | -1.191397 |
| C  | 3.756177  | -0.900500 | -0.715776 |
| H  | 2.941238  | -1.273510 | 1.914091  |
| H  | 1.497360  | -2.241883 | 1.554325  |
| H  | 3.098240  | -2.820508 | 1.069653  |
| H  | 1.544810  | -1.710558 | -2.168735 |
| H  | 2.276661  | -3.077253 | -1.317889 |
| H  | 0.679659  | -2.496320 | -0.835453 |
| H  | 4.293470  | -1.831700 | -0.904210 |
| H  | 3.716006  | -0.340575 | -1.653036 |
| H  | 4.337700  | -0.329393 | 0.010210  |

SMD(MeCN)-B3LYP/6-311+G(d,p)

E = -916.358961



Zero-point correction = 0.408614 (Hartree/Particle)  
 Thermal correction to Energy = 0.432298  
 Thermal correction to Enthalpy = 0.433242  
 Thermal correction to Gibbs Free Energy = 0.356073  
 Sum of electronic and zero-point Energies = -915.950348  
 Sum of electronic and thermal Energies = -915.926663  
 Sum of electronic and thermal Enthalpies = -915.925719  
 Sum of electronic and thermal Free Energies = -916.002889

|    |           |           |           |
|----|-----------|-----------|-----------|
| C  | 1.216498  | 2.516509  | 0.262976  |
| C  | 1.996511  | 1.273151  | 0.117812  |
| H  | 3.075058  | 1.365075  | 0.053300  |
| C  | 1.476279  | -0.049368 | 0.066076  |
| O  | 0.223292  | -0.276128 | 0.214515  |
| C  | 1.915792  | 3.746226  | -0.328570 |
| H  | 2.046627  | 3.640884  | -1.408656 |
| H  | 1.317157  | 4.641035  | -0.144971 |
| H  | 2.899922  | 3.896477  | 0.122892  |
| Si | -1.442653 | -0.195877 | 0.787136  |
| C  | -1.615270 | 1.264040  | 1.937421  |
| H  | -2.568079 | 1.168997  | 2.470163  |
| H  | -0.821540 | 1.266432  | 2.690372  |
| H  | -1.612358 | 2.225318  | 1.420688  |
| C  | -1.647008 | -1.802061 | 1.715246  |
| H  | -2.665578 | -1.868133 | 2.112691  |
| H  | -1.473623 | -2.673469 | 1.080409  |
| H  | -0.958695 | -1.847930 | 2.564752  |
| C  | -2.480280 | -0.074090 | -0.805399 |
| H  | 0.211053  | 2.397817  | -0.145952 |
| H  | 1.074187  | 2.672507  | 1.347157  |
| C  | -3.952226 | 0.113224  | -0.366427 |
| H  | -4.592578 | 0.163780  | -1.255296 |
| H  | -4.312226 | -0.718775 | 0.247278  |
| H  | -4.099299 | 1.040095  | 0.196440  |
| C  | -2.052757 | 1.133064  | -1.663470 |
| H  | -2.130453 | 2.077226  | -1.116432 |
| H  | -1.026522 | 1.034684  | -2.029060 |
| H  | -2.706745 | 1.207716  | -2.540904 |
| C  | -2.359601 | -1.364907 | -1.640043 |
| H  | -1.332498 | -1.547251 | -1.969534 |
| H  | -2.698136 | -2.245720 | -1.086971 |
| H  | -2.982876 | -1.280359 | -2.538559 |
| C  | 2.399351  | -1.232865 | -0.188254 |
| C  | 3.419345  | -1.307675 | 0.979079  |
| C  | 1.608859  | -2.546245 | -0.257706 |
| C  | 3.149311  | -1.012395 | -1.525926 |
| H  | 4.050818  | -0.418777 | 1.036750  |
| H  | 2.911687  | -1.437795 | 1.938353  |
| H  | 4.067971  | -2.172133 | 0.813822  |
| H  | 0.869984  | -2.530664 | -1.061973 |
| H  | 2.304615  | -3.365679 | -0.452697 |
| H  | 1.093082  | -2.757591 | 0.680969  |
| H  | 3.803418  | -1.870216 | -1.703150 |
| H  | 2.447648  | -0.937800 | -2.360731 |

H 3.769973 -0.114097 -1.514060

SMD(MeCN)-LC-BLYP/6-311+G(d,p)

E = -914.207235

Zero-point correction = 0.417865 (Hartree/Particle)

Thermal correction to Energy = 0.440876

Thermal correction to Enthalpy = 0.441820

Thermal correction to Gibbs Free Energy = 0.366400

Sum of electronic and zero-point Energies = -913.789370

Sum of electronic and thermal Energies = -913.766359

Sum of electronic and thermal Enthalpies = -913.765415

Sum of electronic and thermal Free Energies = -913.840835

|    |           |           |           |
|----|-----------|-----------|-----------|
| C  | 1.255368  | 2.497504  | 0.187077  |
| C  | 2.039298  | 1.278346  | -0.014779 |
| H  | 3.108878  | 1.363002  | -0.160533 |
| C  | 1.487429  | -0.018218 | 0.006471  |
| O  | 0.246771  | -0.158681 | 0.216615  |
| C  | 1.965577  | 3.754525  | -0.267567 |
| H  | 2.161154  | 3.727947  | -1.340518 |
| H  | 1.356023  | 4.633387  | -0.058404 |
| H  | 2.919321  | 3.874721  | 0.248527  |
| Si | -1.394531 | -0.166535 | 0.779701  |
| C  | -1.586936 | 1.282199  | 1.898461  |
| H  | -2.544967 | 1.204473  | 2.418805  |
| H  | -0.803932 | 1.296354  | 2.659204  |
| H  | -1.569659 | 2.231205  | 1.362259  |
| C  | -1.561706 | -1.765351 | 1.674051  |
| H  | -2.605070 | -1.921833 | 1.960300  |
| H  | -1.252955 | -2.610805 | 1.058033  |
| H  | -0.967006 | -1.767219 | 2.589657  |
| C  | -2.410295 | -0.056514 | -0.784477 |
| H  | 0.276584  | 2.396165  | -0.286924 |
| H  | 1.041250  | 2.553922  | 1.264811  |
| C  | -3.852116 | 0.223916  | -0.365425 |
| H  | -4.491130 | 0.254097  | -1.252939 |
| H  | -4.250805 | -0.551044 | 0.294767  |
| H  | -3.951826 | 1.185169  | 0.143776  |
| C  | -1.919016 | 1.076318  | -1.676257 |
| H  | -1.932785 | 2.040520  | -1.162403 |
| H  | -0.904042 | 0.899086  | -2.039019 |
| H  | -2.569655 | 1.162515  | -2.551856 |
| C  | -2.359171 | -1.369801 | -1.554651 |
| H  | -1.344125 | -1.623095 | -1.868163 |
| H  | -2.748283 | -2.203110 | -0.965550 |
| H  | -2.971690 | -1.289873 | -2.457892 |
| C  | 2.297298  | -1.269835 | -0.180888 |
| C  | 2.391468  | -1.928567 | 1.196132  |
| C  | 1.561319  | -2.192812 | -1.143714 |
| C  | 3.692086  | -0.985486 | -0.709670 |
| H  | 2.889562  | -1.277098 | 1.916672  |
| H  | 1.405138  | -2.189112 | 1.581861  |
| H  | 2.975601  | -2.845580 | 1.106236  |
| H  | 1.442227  | -1.728576 | -2.124691 |

|   |          |           |           |
|---|----------|-----------|-----------|
| H | 2.144090 | -3.106043 | -1.268705 |
| H | 0.577540 | -2.467289 | -0.765771 |
| H | 4.202432 | -1.935501 | -0.870893 |
| H | 3.662981 | -0.455043 | -1.663204 |
| H | 4.290805 | -0.407741 | -0.004761 |

[10-H]<sup>+</sup>

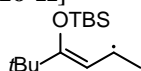

CAM-B3LYP/6-311+G(d,p)

E = -915.521204

Zero-point correction = 0.400996 (Hartree/Particle)

Thermal correction to Energy = 0.424006

Thermal correction to Enthalpy = 0.424950

Thermal correction to Gibbs Free Energy = 0.349546

Sum of electronic and zero-point Energies = -915.120208

Sum of electronic and thermal Energies = -915.097198

Sum of electronic and thermal Enthalpies = -915.096254

Sum of electronic and thermal Free Energies = -915.171658

|    |           |           |           |
|----|-----------|-----------|-----------|
| C  | 1.079287  | 2.516280  | -0.109012 |
| C  | 1.895723  | 1.412034  | -0.001628 |
| H  | 2.953488  | 1.598451  | 0.141882  |
| C  | 1.517770  | 0.077390  | -0.078441 |
| O  | 0.205847  | -0.255581 | -0.240811 |
| C  | 2.477689  | -1.093165 | -0.200556 |
| C  | 1.570183  | 3.921340  | 0.009533  |
| H  | 1.351117  | 4.502172  | -0.893181 |
| H  | 1.088172  | 4.448978  | 0.840779  |
| H  | 2.648909  | 3.956755  | 0.176183  |
| Si | -1.210594 | -0.304955 | 0.660964  |
| C  | -1.226826 | 1.015513  | 1.988969  |
| H  | -2.022670 | 0.807658  | 2.709478  |
| H  | -0.280068 | 1.020161  | 2.534719  |
| H  | -1.381815 | 2.020352  | 1.595256  |
| C  | -1.368723 | -1.972588 | 1.503507  |
| H  | -2.352101 | -2.064893 | 1.972707  |
| H  | -1.254219 | -2.803270 | 0.804455  |
| H  | -0.621438 | -2.090231 | 2.291122  |
| C  | -2.594714 | -0.079032 | -0.619103 |
| H  | 0.025228  | 2.377770  | -0.313310 |
| C  | 2.185507  | -2.139202 | 0.887109  |
| H  | 2.293998  | -1.709495 | 1.886467  |
| H  | 1.177557  | -2.539397 | 0.791216  |
| H  | 2.885467  | -2.974482 | 0.801884  |
| C  | 2.278069  | -1.743069 | -1.582659 |
| H  | 2.518813  | -1.038457 | -2.382142 |
| H  | 2.929229  | -2.615047 | -1.688180 |
| H  | 1.245198  | -2.066321 | -1.714656 |
| C  | 3.939777  | -0.655697 | -0.070385 |
| H  | 4.588118  | -1.529663 | -0.165329 |
| H  | 4.223562  | 0.052389  | -0.851302 |
| H  | 4.141712  | -0.198084 | 0.900922  |
| C  | -3.957847 | -0.072880 | 0.090675  |

|   |           |           |           |
|---|-----------|-----------|-----------|
| H | -4.761687 | 0.057042  | -0.642451 |
| H | -4.151923 | -1.009644 | 0.619795  |
| H | -4.041409 | 0.744861  | 0.812011  |
| C | -2.419297 | 1.245319  | -1.375085 |
| H | -2.468656 | 2.109528  | -0.706623 |
| H | -1.466290 | 1.280842  | -1.906883 |
| H | -3.218923 | 1.363299  | -2.115190 |
| C | -2.556909 | -1.233641 | -1.631707 |
| H | -2.727703 | -2.202297 | -1.154880 |
| H | -3.340453 | -1.098828 | -2.386026 |
| H | -1.597806 | -1.277745 | -2.153023 |

SMD(MeCN)-CAM-B3LYP/6-311+G(d,p)

E = -915.531699

Zero-point correction = 0.399375 (Hartree/Particle)

Thermal correction to Energy = 0.422253

Thermal correction to Enthalpy = 0.423197

Thermal correction to Gibbs Free Energy = 0.348702

Sum of electronic and zero-point Energies = -915.132324

Sum of electronic and thermal Energies = -915.109446

Sum of electronic and thermal Enthalpies = -915.108502

Sum of electronic and thermal Free Energies = -915.182996

|    |           |           |           |
|----|-----------|-----------|-----------|
| C  | 1.036628  | 2.527247  | -0.077975 |
| C  | 1.876181  | 1.434104  | -0.010264 |
| H  | 2.932986  | 1.637979  | 0.119047  |
| C  | 1.520767  | 0.093029  | -0.107038 |
| O  | 0.216362  | -0.258594 | -0.279605 |
| C  | 2.506521  | -1.059018 | -0.210665 |
| C  | 1.510121  | 3.937662  | 0.049969  |
| H  | 1.262100  | 4.528759  | -0.839555 |
| H  | 1.034360  | 4.447970  | 0.896186  |
| H  | 2.591860  | 3.987580  | 0.195136  |
| Si | -1.199098 | -0.366768 | 0.632527  |
| C  | -1.183358 | 0.859755  | 2.045186  |
| H  | -1.972675 | 0.601872  | 2.758127  |
| H  | -0.232700 | 0.816042  | 2.584757  |
| H  | -1.342568 | 1.890496  | 1.724081  |
| C  | -1.355649 | -2.087277 | 1.353055  |
| H  | -2.361519 | -2.222120 | 1.763303  |
| H  | -1.193649 | -2.870529 | 0.609136  |
| H  | -0.648200 | -2.243310 | 2.171198  |
| C  | -2.611123 | -0.049337 | -0.598753 |
| H  | -0.023372 | 2.377081  | -0.242134 |
| C  | 2.243549  | -2.084417 | 0.904099  |
| H  | 2.326660  | -1.624614 | 1.892812  |
| H  | 1.253008  | -2.528374 | 0.812856  |
| H  | 2.978059  | -2.892537 | 0.845826  |
| C  | 2.318014  | -1.748688 | -1.573771 |
| H  | 2.530808  | -1.059101 | -2.395456 |
| H  | 2.998681  | -2.600216 | -1.661407 |
| H  | 1.297061  | -2.114572 | -1.691867 |
| C  | 3.959160  | -0.586926 | -0.098939 |
| H  | 4.624106  | -1.449760 | -0.185169 |

|   |           |           |           |
|---|-----------|-----------|-----------|
| H | 4.222822  | 0.116009  | -0.892215 |
| H | 4.159615  | -0.109948 | 0.863624  |
| C | -3.938972 | 0.012354  | 0.173648  |
| H | -4.769389 | 0.171256  | -0.524301 |
| H | -4.144876 | -0.913388 | 0.718499  |
| H | -3.955853 | 0.835963  | 0.893272  |
| C | -2.411986 | 1.276518  | -1.344078 |
| H | -2.373745 | 2.130245  | -0.661669 |
| H | -1.492856 | 1.276306  | -1.934529 |
| H | -3.248683 | 1.447333  | -2.032194 |
| C | -2.681443 | -1.190324 | -1.624459 |
| H | -2.874315 | -2.156452 | -1.150483 |
| H | -3.495879 | -1.006430 | -2.335336 |
| H | -1.755823 | -1.278119 | -2.200163 |

SMD(DCE)-CAM-B3LYP/6-311+G(d,p)

E = -915.532276

Zero-point correction = 0.399633 (Hartree/Particle)

Thermal correction to Energy = 0.422513

Thermal correction to Enthalpy = 0.423457

Thermal correction to Gibbs Free Energy = 0.348965

Sum of electronic and zero-point Energies = -915.132642

Sum of electronic and thermal Energies = -915.109763

Sum of electronic and thermal Enthalpies = -915.108818

Sum of electronic and thermal Free Energies = -915.183310

|    |           |           |           |
|----|-----------|-----------|-----------|
| C  | 1.037128  | 2.526129  | -0.078261 |
| C  | 1.876704  | 1.433668  | -0.008467 |
| H  | 2.933465  | 1.637589  | 0.120499  |
| C  | 1.521542  | 0.092684  | -0.103422 |
| O  | 0.216771  | -0.259784 | -0.273613 |
| C  | 2.506537  | -1.059629 | -0.210238 |
| C  | 1.508714  | 3.937190  | 0.047075  |
| H  | 1.260787  | 4.525935  | -0.843982 |
| H  | 1.032459  | 4.448751  | 0.892232  |
| H  | 2.590276  | 3.989084  | 0.192589  |
| Si | -1.199908 | -0.362902 | 0.634835  |
| C  | -1.189247 | 0.868045  | 2.043981  |
| H  | -1.975299 | 0.608205  | 2.759798  |
| H  | -0.237336 | 0.831673  | 2.581730  |
| H  | -1.353630 | 1.897803  | 1.722577  |
| C  | -1.357551 | -2.080530 | 1.362937  |
| H  | -2.362743 | -2.215094 | 1.774868  |
| H  | -1.196094 | -2.867452 | 0.622809  |
| H  | -0.650150 | -2.234098 | 2.181583  |
| C  | -2.609484 | -0.052152 | -0.601373 |
| H  | -0.022067 | 2.374308  | -0.245364 |
| C  | 2.243174  | -2.087749 | 0.901909  |
| H  | 2.327879  | -1.630966 | 1.891863  |
| H  | 1.251941  | -2.530028 | 0.810284  |
| H  | 2.975931  | -2.897280 | 0.841556  |
| C  | 2.316827  | -1.745134 | -1.575316 |
| H  | 2.529362  | -1.053250 | -2.394950 |
| H  | 2.996284  | -2.597294 | -1.666505 |

|   |           |           |           |
|---|-----------|-----------|-----------|
| H | 1.295445  | -2.109335 | -1.694200 |
| C | 3.959474  | -0.588629 | -0.097640 |
| H | 4.624603  | -1.451161 | -0.185405 |
| H | 4.223749  | 0.115244  | -0.889787 |
| H | 4.160508  | -0.113667 | 0.865778  |
| C | -3.939820 | 0.012168  | 0.166381  |
| H | -4.768496 | 0.168031  | -0.534223 |
| H | -4.147974 | -0.911259 | 0.714301  |
| H | -3.959929 | 0.838532  | 0.882785  |
| C | -2.408666 | 1.270094  | -1.352705 |
| H | -2.378593 | 2.128230  | -0.675381 |
| H | -1.485448 | 1.269293  | -1.936556 |
| H | -3.240697 | 1.435304  | -2.047734 |
| C | -2.674877 | -1.197880 | -1.622175 |
| H | -2.867702 | -2.162381 | -1.144892 |
| H | -3.487276 | -1.019087 | -2.336583 |
| H | -1.747433 | -1.286375 | -2.194602 |

SMD(MeCN)-B3LYP/6-311+G(d,p)

E = -915.918922

Zero-point correction = 0.395352 (Hartree/Particle)

Thermal correction to Energy = 0.418564

Thermal correction to Enthalpy = 0.419508

Thermal correction to Gibbs Free Energy = 0.344021

Sum of electronic and zero-point Energies = -915.523571

Sum of electronic and thermal Energies = -915.500359

Sum of electronic and thermal Enthalpies = -915.499414

Sum of electronic and thermal Free Energies = -915.574901

|    |           |           |           |
|----|-----------|-----------|-----------|
| C  | 1.083848  | 2.543370  | -0.071103 |
| C  | 1.901564  | 1.427129  | -0.012559 |
| H  | 2.963926  | 1.612777  | 0.104023  |
| C  | 1.527730  | 0.084117  | -0.103522 |
| O  | 0.213668  | -0.256475 | -0.266895 |
| C  | 2.509043  | -1.081073 | -0.212935 |
| C  | 1.591922  | 3.946681  | 0.045647  |
| H  | 1.340065  | 4.543949  | -0.841129 |
| H  | 1.142127  | 4.471847  | 0.899558  |
| H  | 2.678119  | 3.975520  | 0.171340  |
| Si | -1.216887 | -0.357065 | 0.641299  |
| C  | -1.204520 | 0.874859  | 2.062981  |
| H  | -2.004425 | 0.624575  | 2.768645  |
| H  | -0.258839 | 0.820741  | 2.612669  |
| H  | -1.349778 | 1.908608  | 1.741156  |
| C  | -1.380226 | -2.085090 | 1.369118  |
| H  | -2.385631 | -2.215860 | 1.785001  |
| H  | -1.224032 | -2.872004 | 0.626188  |
| H  | -0.668863 | -2.241540 | 2.185467  |
| C  | -2.632329 | -0.034928 | -0.608468 |
| H  | 0.017462  | 2.419838  | -0.220192 |
| C  | 2.265647  | -2.096413 | 0.927466  |
| H  | 2.374887  | -1.623614 | 1.908591  |
| H  | 1.270113  | -2.536602 | 0.867119  |
| H  | 2.994767  | -2.910526 | 0.862849  |

|   |           |           |           |
|---|-----------|-----------|-----------|
| C | 2.290323  | -1.793746 | -1.569695 |
| H | 2.485163  | -1.114986 | -2.406137 |
| H | 2.970712  | -2.646605 | -1.660379 |
| H | 1.267127  | -2.163217 | -1.662395 |
| C | 3.974996  | -0.616722 | -0.137725 |
| H | 4.631986  | -1.486512 | -0.228874 |
| H | 4.227966  | 0.075792  | -0.945076 |
| H | 4.201842  | -0.130708 | 0.815606  |
| C | -3.969654 | 0.030786  | 0.162598  |
| H | -4.798043 | 0.191778  | -0.539407 |
| H | -4.181407 | -0.894767 | 0.707492  |
| H | -3.988275 | 0.855438  | 0.882456  |
| C | -2.427072 | 1.296528  | -1.357454 |
| H | -2.384389 | 2.151243  | -0.675035 |
| H | -1.508223 | 1.292927  | -1.950051 |
| H | -3.264306 | 1.471679  | -2.046008 |
| C | -2.703048 | -1.181184 | -1.639582 |
| H | -2.897040 | -2.148835 | -1.166946 |
| H | -3.518115 | -0.996574 | -2.351653 |
| H | -1.777155 | -1.269523 | -2.216502 |

SMD(MeCN)-LC-BLYP/6-311+G(d,p)

E = -913.775900

Zero-point correction = 0.404746 (Hartree/Particle)

Thermal correction to Energy = 0.427182

Thermal correction to Enthalpy = 0.428126

Thermal correction to Gibbs Free Energy = 0.354771

Sum of electronic and zero-point Energies = -913.371154

Sum of electronic and thermal Energies = -913.348718

Sum of electronic and thermal Enthalpies = -913.347774

Sum of electronic and thermal Free Energies = -913.421129

|    |           |           |           |
|----|-----------|-----------|-----------|
| C  | 0.995686  | 2.506673  | -0.084244 |
| C  | 1.852618  | 1.436659  | -0.009765 |
| H  | 2.904566  | 1.656180  | 0.130666  |
| C  | 1.512875  | 0.101258  | -0.113009 |
| O  | 0.218957  | -0.258068 | -0.289401 |
| C  | 2.497153  | -1.038326 | -0.207512 |
| C  | 1.435320  | 3.919059  | 0.054409  |
| H  | 1.188039  | 4.506431  | -0.835374 |
| H  | 0.937854  | 4.413589  | 0.894977  |
| H  | 2.512430  | 3.989744  | 0.214942  |
| Si | -1.182528 | -0.375311 | 0.622195  |
| C  | -1.162900 | 0.843666  | 2.021191  |
| H  | -1.945034 | 0.583065  | 2.738802  |
| H  | -0.209094 | 0.805729  | 2.552990  |
| H  | -1.329391 | 1.871558  | 1.698498  |
| C  | -1.332912 | -2.084201 | 1.332413  |
| H  | -2.338791 | -2.222476 | 1.737607  |
| H  | -1.165990 | -2.862446 | 0.586130  |
| H  | -0.628476 | -2.240729 | 2.151192  |
| C  | -2.585785 | -0.060724 | -0.588941 |
| H  | -0.058097 | 2.331687  | -0.261701 |
| C  | 2.210281  | -2.066531 | 0.881148  |

|   |           |           |           |
|---|-----------|-----------|-----------|
| H | 2.269040  | -1.617806 | 1.875640  |
| H | 1.222935  | -2.508422 | 0.760174  |
| H | 2.945414  | -2.873039 | 0.832156  |
| C | 2.336944  | -1.705734 | -1.571109 |
| H | 2.567623  | -1.007728 | -2.379252 |
| H | 3.016142  | -2.557326 | -1.654952 |
| H | 1.317898  | -2.066333 | -1.712565 |
| C | 3.933597  | -0.565063 | -0.059878 |
| H | 4.603718  | -1.423223 | -0.138071 |
| H | 4.211240  | 0.145325  | -0.840150 |
| H | 4.108556  | -0.095489 | 0.910078  |
| C | -3.901199 | -0.004233 | 0.181494  |
| H | -4.732927 | 0.156145  | -0.512342 |
| H | -4.103615 | -0.931703 | 0.722743  |
| H | -3.916290 | 0.815769  | 0.903819  |
| C | -2.388764 | 1.258261  | -1.323543 |
| H | -2.353398 | 2.108289  | -0.637709 |
| H | -1.468498 | 1.261201  | -1.910680 |
| H | -3.223286 | 1.430023  | -2.011777 |
| C | -2.652121 | -1.191725 | -1.608490 |
| H | -2.845661 | -2.157120 | -1.135446 |
| H | -3.463213 | -1.007891 | -2.321019 |
| H | -1.724730 | -1.278341 | -2.179885 |

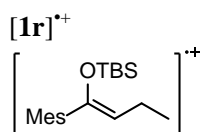

SMD(MeCN)-CAM-B3LYP/6-311+G(d,p)

E = -1107.653979

Zero-point correction = 0.463905 (Hartree/Particle)

Thermal correction to Energy = 0.491634

Thermal correction to Enthalpy = 0.492578

Thermal correction to Gibbs Free Energy = 0.405728

Sum of electronic and zero-point Energies = -1107.190074

Sum of electronic and thermal Energies = -1107.162345

Sum of electronic and thermal Enthalpies = -1107.161400

Sum of electronic and thermal Free Energies = -1107.248251

|    |           |           |           |
|----|-----------|-----------|-----------|
| C  | -1.072680 | 3.297834  | -0.160037 |
| C  | 0.177762  | 2.526554  | -0.152671 |
| H  | 1.128643  | 3.047892  | -0.190116 |
| C  | 0.235037  | 1.117733  | -0.065840 |
| O  | -0.881501 | 0.486774  | 0.000521  |
| C  | -0.939555 | 4.687323  | -0.770935 |
| H  | -0.679228 | 4.626151  | -1.829649 |
| H  | -1.883591 | 5.227537  | -0.686045 |
| H  | -0.167976 | 5.269554  | -0.262631 |
| Si | -1.555770 | -1.033194 | 0.627202  |
| C  | -1.633397 | -0.698561 | 2.451447  |
| H  | -2.217106 | -1.479438 | 2.947998  |
| H  | -0.631218 | -0.706860 | 2.887311  |
| H  | -2.099299 | 0.263874  | 2.672249  |



|   |           |           |           |
|---|-----------|-----------|-----------|
| C | -0.457689 | -2.473005 | 0.226068  |
| H | -0.879122 | -3.358650 | 0.713282  |
| H | -0.396894 | -2.680743 | -0.843130 |
| H | 0.551848  | -2.337708 | 0.618244  |
| C | -3.226064 | -1.080045 | -0.244257 |
| H | -1.870525 | 2.716433  | -0.629287 |
| H | -1.375143 | 3.385474  | 0.897994  |
| C | -3.922715 | -2.399189 | 0.131223  |
| H | -4.906338 | -2.442666 | -0.348753 |
| H | -3.356948 | -3.272946 | -0.203123 |
| H | -4.082258 | -2.491072 | 1.209573  |
| C | -4.101041 | 0.098739  | 0.204815  |
| H | -4.301510 | 0.072767  | 1.279180  |
| H | -3.642500 | 1.062795  | -0.030689 |
| H | -5.066354 | 0.057275  | -0.311688 |
| C | -3.036917 | -1.025780 | -1.767139 |
| H | -2.562956 | -0.094382 | -2.087567 |
| H | -2.432743 | -1.858687 | -2.136268 |
| H | -4.013256 | -1.085823 | -2.260514 |
| C | 1.531525  | 0.404474  | -0.097720 |
| C | 1.890126  | -0.309909 | -1.253220 |
| C | 2.389348  | 0.481925  | 1.008997  |
| C | 3.114477  | -0.963766 | -1.264481 |
| C | 1.009728  | -0.347847 | -2.474554 |
| C | 3.594377  | -0.210402 | 0.955643  |
| C | 2.034187  | 1.280146  | 2.235125  |
| C | 3.971983  | -0.940073 | -0.166731 |
| H | 3.409818  | -1.502451 | -2.159074 |
| H | 0.210652  | -1.085467 | -2.372785 |
| H | 0.543580  | 0.619602  | -2.673475 |
| H | 1.596737  | -0.622741 | -3.351141 |
| H | 4.256176  | -0.172941 | 1.814192  |
| H | 2.061975  | 2.354172  | 2.028298  |
| H | 1.033603  | 1.043743  | 2.604438  |
| H | 2.744371  | 1.080809  | 3.037828  |
| C | 5.277449  | -1.682671 | -0.205507 |
| H | 5.895961  | -1.444111 | 0.660557  |
| H | 5.108076  | -2.763072 | -0.212349 |
| H | 5.840683  | -1.438682 | -1.109226 |

SMD(MeCN)-B3LYP/6-311+G(d,p)

E = -1108.155915

Zero-point correction = 0.459821 (Hartree/Particle)

Thermal correction to Energy = 0.487442

Thermal correction to Enthalpy = 0.488386

Thermal correction to Gibbs Free Energy = 0.401626

Sum of electronic and zero-point Energies = -1107.696094

Sum of electronic and thermal Energies = -1107.668473

Sum of electronic and thermal Enthalpies = -1107.667529

Sum of electronic and thermal Free Energies = -1107.754289

|   |           |          |           |
|---|-----------|----------|-----------|
| C | -0.929019 | 3.296486 | -0.280212 |
| C | 0.285167  | 2.471179 | -0.131607 |
| H | 1.240854  | 2.979059 | -0.066873 |

|    |           |           |           |
|----|-----------|-----------|-----------|
| C  | 0.306097  | 1.063145  | -0.089355 |
| O  | -0.837576 | 0.433627  | -0.152759 |
| C  | -0.727976 | 4.516246  | -1.192058 |
| H  | -0.505445 | 4.205917  | -2.216095 |
| H  | -1.637582 | 5.120545  | -1.209824 |
| H  | 0.093086  | 5.145143  | -0.838089 |
| Si | -1.689507 | -0.834032 | 0.733674  |
| C  | -1.917675 | -0.084342 | 2.432544  |
| H  | -2.541720 | -0.738817 | 3.050199  |
| H  | -0.953875 | 0.027324  | 2.939086  |
| H  | -2.397289 | 0.896614  | 2.386258  |
| C  | -0.655800 | -2.387246 | 0.817226  |
| H  | -1.174525 | -3.112522 | 1.454310  |
| H  | -0.500225 | -2.853488 | -0.157935 |
| H  | 0.319331  | -2.195813 | 1.273156  |
| C  | -3.308560 | -1.035408 | -0.242949 |
| H  | -1.777694 | 2.688385  | -0.597817 |
| H  | -1.174405 | 3.655826  | 0.735572  |
| C  | -4.130400 | -2.152961 | 0.441327  |
| H  | -5.086826 | -2.276055 | -0.081036 |
| H  | -3.615635 | -3.118251 | 0.414344  |
| H  | -4.357875 | -1.919648 | 1.486524  |
| C  | -4.123810 | 0.273940  | -0.221059 |
| H  | -4.382313 | 0.580257  | 0.796938  |
| H  | -3.586750 | 1.099768  | -0.696748 |
| H  | -5.063372 | 0.132169  | -0.769378 |
| C  | -3.030311 | -1.438579 | -1.705394 |
| H  | -2.475213 | -0.665569 | -2.244300 |
| H  | -2.466742 | -2.373733 | -1.775655 |
| H  | -3.980519 | -1.588294 | -2.233054 |
| C  | 1.579206  | 0.331414  | -0.102149 |
| C  | 1.834629  | -0.603419 | -1.148119 |
| C  | 2.561373  | 0.581759  | 0.896290  |
| C  | 3.059816  | -1.258212 | -1.163066 |
| C  | 0.870993  | -0.844284 | -2.285631 |
| C  | 3.753316  | -0.135723 | 0.847723  |
| C  | 2.345828  | 1.548020  | 2.036542  |
| C  | 4.027988  | -1.054119 | -0.170904 |
| H  | 3.276257  | -1.940028 | -1.979397 |
| H  | 0.125843  | -1.600792 | -2.028571 |
| H  | 0.336452  | 0.061731  | -2.576509 |
| H  | 1.416110  | -1.209038 | -3.158006 |
| H  | 4.486909  | 0.019643  | 1.631737  |
| H  | 2.554911  | 2.577887  | 1.727779  |
| H  | 1.325842  | 1.519487  | 2.423927  |
| H  | 3.026596  | 1.315147  | 2.857409  |
| C  | 5.334257  | -1.795829 | -0.218082 |
| H  | 5.959818  | -1.561367 | 0.644745  |
| H  | 5.167937  | -2.877473 | -0.242866 |
| H  | 5.891061  | -1.538988 | -1.125599 |

SMD(MeCN)-LC-BLYP/6-311+G(d,p)

E = -1105.410599

Zero-point correction = 0.471175 (Hartree/Particle)  
 Thermal correction to Energy = 0.497955  
 Thermal correction to Enthalpy = 0.498899  
 Thermal correction to Gibbs Free Energy = 0.414533  
 Sum of electronic and zero-point Energies = -1104.939425  
 Sum of electronic and thermal Energies = -1104.912644  
 Sum of electronic and thermal Enthalpies = -1104.911700  
 Sum of electronic and thermal Free Energies = -1104.996066

|    |           |           |           |
|----|-----------|-----------|-----------|
| C  | -1.201606 | 3.282870  | 0.076045  |
| C  | 0.061965  | 2.558887  | -0.056528 |
| H  | 0.984189  | 3.100098  | -0.244470 |
| C  | 0.166968  | 1.163764  | 0.078869  |
| O  | -0.904258 | 0.518581  | 0.310231  |
| C  | -1.148490 | 4.701596  | -0.446317 |
| H  | -0.932253 | 4.716976  | -1.515456 |
| H  | -2.103880 | 5.202068  | -0.289895 |
| H  | -0.376841 | 5.279387  | 0.064574  |
| Si | -1.475447 | -1.128145 | 0.604761  |
| C  | -1.771745 | -1.132633 | 2.419865  |
| H  | -2.387122 | -1.994363 | 2.690605  |
| H  | -0.835329 | -1.210965 | 2.974492  |
| H  | -2.294299 | -0.231946 | 2.744957  |
| C  | -0.207295 | -2.346716 | 0.067761  |
| H  | -0.594255 | -3.346951 | 0.282310  |
| H  | 0.000816  | -2.294891 | -1.001064 |
| H  | 0.728864  | -2.233041 | 0.615187  |
| C  | -3.033721 | -1.157199 | -0.422013 |
| H  | -2.003889 | 2.703406  | -0.389461 |
| H  | -1.448665 | 3.277635  | 1.148583  |
| C  | -3.616131 | -2.566589 | -0.351318 |
| H  | -4.548871 | -2.606386 | -0.921832 |
| H  | -2.939399 | -3.310917 | -0.777372 |
| H  | -3.848205 | -2.867057 | 0.673683  |
| C  | -4.046394 | -0.163355 | 0.133331  |
| H  | -4.332237 | -0.403588 | 1.159751  |
| H  | -3.664565 | 0.860234  | 0.119724  |
| H  | -4.955993 | -0.184142 | -0.474688 |
| C  | -2.725305 | -0.814792 | -1.874398 |
| H  | -2.326254 | 0.196452  | -1.982041 |
| H  | -2.008672 | -1.510636 | -2.316540 |
| H  | -3.643747 | -0.869528 | -2.466716 |
| C  | 1.471314  | 0.477785  | -0.033834 |
| C  | 1.896953  | 0.021333  | -1.275609 |
| C  | 2.246195  | 0.319600  | 1.108016  |
| C  | 3.115622  | -0.622897 | -1.349072 |
| C  | 1.055770  | 0.195075  | -2.500631 |
| C  | 3.456732  | -0.335463 | 0.988002  |
| C  | 1.793245  | 0.845008  | 2.434429  |
| C  | 3.903362  | -0.817400 | -0.228599 |
| H  | 3.461726  | -0.980820 | -2.313204 |
| H  | 0.214586  | -0.501788 | -2.501221 |
| H  | 0.644726  | 1.203937  | -2.574423 |
| H  | 1.642732  | 0.005239  | -3.398062 |

|   |          |           |           |
|---|----------|-----------|-----------|
| H | 4.071700 | -0.464815 | 1.872188  |
| H | 1.595232 | 1.918442  | 2.391375  |
| H | 0.875826 | 0.357149  | 2.770210  |
| H | 2.555228 | 0.676288  | 3.193715  |
| C | 5.205095 | -1.544385 | -0.333772 |
| H | 5.856408 | -1.315915 | 0.509547  |
| H | 5.040083 | -2.624270 | -0.342720 |
| H | 5.727491 | -1.286842 | -1.255599 |

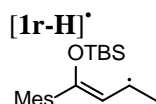

CAM-B3LYP/6-311+G(d,p)

E = -1107.205038

Zero-point correction = 0.452097 (Hartree/Particle)

Thermal correction to Energy = 0.479686

Thermal correction to Enthalpy = 0.480631

Thermal correction to Gibbs Free Energy = 0.392433

Sum of electronic and zero-point Energies = -1106.752941

Sum of electronic and thermal Energies = -1106.725351

Sum of electronic and thermal Enthalpies = -1106.724407

Sum of electronic and thermal Free Energies = -1106.812605

|    |           |           |           |
|----|-----------|-----------|-----------|
| C  | -1.065271 | 3.172856  | -0.589462 |
| C  | 0.113093  | 2.486516  | -0.444439 |
| H  | 1.041220  | 3.050625  | -0.434743 |
| C  | 0.246219  | 1.103571  | -0.331648 |
| O  | -0.874021 | 0.331521  | -0.426267 |
| C  | 1.549920  | 0.412108  | -0.226596 |
| C  | 2.431753  | 0.679787  | 0.832959  |
| C  | 1.916397  | -0.529253 | -1.210294 |
| C  | 3.641370  | -0.009293 | 0.902080  |
| C  | 3.133146  | -1.186094 | -1.103674 |
| C  | 4.009697  | -0.948518 | -0.048706 |
| H  | 4.311119  | 0.195226  | 1.731518  |
| H  | 3.412993  | -1.897230 | -1.875076 |
| C  | -1.153401 | 4.655659  | -0.736201 |
| H  | -1.617002 | 4.937131  | -1.688166 |
| H  | -1.770866 | 5.101195  | 0.051497  |
| H  | -0.167502 | 5.123265  | -0.693936 |
| Si | -1.568472 | -0.741579 | 0.674801  |
| C  | -1.810501 | 0.145000  | 2.306538  |
| H  | -2.369271 | -0.475958 | 3.011660  |
| H  | -0.847185 | 0.372992  | 2.769065  |
| H  | -2.350896 | 1.085270  | 2.181387  |
| C  | -0.471883 | -2.235752 | 0.936827  |
| H  | -0.921920 | -2.916431 | 1.664730  |
| H  | -0.306409 | -2.794504 | 0.013728  |
| H  | 0.506155  | -1.938062 | 1.320590  |
| C  | -3.215097 | -1.211336 | -0.140796 |
| H  | -1.990915 | 2.608591  | -0.615820 |
| C  | 2.119679  | 1.687503  | 1.910923  |
| H  | 2.419712  | 2.695757  | 1.612038  |

|   |           |           |           |
|---|-----------|-----------|-----------|
| H | 1.054805  | 1.730603  | 2.137493  |
| H | 2.661403  | 1.445592  | 2.826594  |
| C | 1.033352  | -0.806575 | -2.398802 |
| H | 0.213539  | -1.480835 | -2.144210 |
| H | 0.579179  | 0.110057  | -2.778564 |
| H | 1.610536  | -1.266265 | -3.202144 |
| C | 5.309915  | -1.699241 | 0.054498  |
| H | 5.831234  | -1.721416 | -0.905010 |
| H | 5.974510  | -1.243640 | 0.789757  |
| H | 5.140659  | -2.736524 | 0.356860  |
| C | -2.955995 | -1.834989 | -1.520263 |
| H | -3.906562 | -2.093339 | -2.000753 |
| H | -2.426428 | -1.143074 | -2.178725 |
| H | -2.367871 | -2.754074 | -1.450126 |
| C | -3.958962 | -2.227554 | 0.739855  |
| H | -4.186843 | -1.825210 | 1.730901  |
| H | -4.912483 | -2.499997 | 0.273983  |
| H | -3.388603 | -3.150571 | 0.874229  |
| C | -4.090778 | 0.037615  | -0.317738 |
| H | -4.327448 | 0.511670  | 0.638564  |
| H | -3.602989 | 0.780141  | -0.952792 |
| H | -5.041002 | -0.233113 | -0.791961 |

SMD(MeCN)-CAM-B3LYP/6-311+G(d,p)

E = -1107.220682

Zero-point correction = 0.450833 (Hartree/Particle)

Thermal correction to Energy = 0.478125

Thermal correction to Enthalpy = 0.479069

Thermal correction to Gibbs Free Energy = 0.393195

Sum of electronic and zero-point Energies = -1106.769849

Sum of electronic and thermal Energies = -1106.742557

Sum of electronic and thermal Enthalpies = -1106.741612

Sum of electronic and thermal Free Energies = -1106.827487

|    |           |           |           |
|----|-----------|-----------|-----------|
| C  | -1.050123 | 3.146675  | -0.595928 |
| C  | 0.126168  | 2.458007  | -0.432256 |
| H  | 1.051748  | 3.025899  | -0.398485 |
| C  | 0.259047  | 1.072098  | -0.324150 |
| O  | -0.856395 | 0.300845  | -0.436830 |
| C  | 1.569463  | 0.389789  | -0.216896 |
| C  | 2.441849  | 0.660513  | 0.854787  |
| C  | 1.954359  | -0.539293 | -1.203876 |
| C  | 3.662125  | -0.007892 | 0.924185  |
| C  | 3.184868  | -1.179278 | -1.096156 |
| C  | 4.054622  | -0.930770 | -0.038771 |
| H  | 4.320543  | 0.194847  | 1.763372  |
| H  | 3.476010  | -1.885780 | -1.867362 |
| C  | -1.130539 | 4.630802  | -0.733488 |
| H  | -1.572029 | 4.921334  | -1.693948 |
| H  | -1.769376 | 5.070891  | 0.040879  |
| H  | -0.144665 | 5.096075  | -0.662108 |
| Si | -1.583791 | -0.780396 | 0.645909  |
| C  | -1.722010 | 0.052486  | 2.313797  |

|   |           |           |           |
|---|-----------|-----------|-----------|
| H | -2.352133 | -0.537127 | 2.986489  |
| H | -0.740235 | 0.146635  | 2.786151  |
| H | -2.155470 | 1.052608  | 2.237433  |
| C | -0.569412 | -2.341968 | 0.808725  |
| H | -1.042190 | -3.020449 | 1.525360  |
| H | -0.469123 | -2.875384 | -0.139427 |
| H | 0.433943  | -2.122997 | 1.182042  |
| C | -3.277246 | -1.131524 | -0.132581 |
| H | -1.979724 | 2.588272  | -0.639953 |
| C | 2.097572  | 1.642823  | 1.944942  |
| H | 2.287700  | 2.672649  | 1.630380  |
| H | 1.046262  | 1.584114  | 2.229952  |
| H | 2.706634  | 1.454122  | 2.830487  |
| C | 1.081363  | -0.834773 | -2.395111 |
| H | 0.256975  | -1.502079 | -2.135751 |
| H | 0.636961  | 0.076572  | -2.800953 |
| H | 1.664881  | -1.312831 | -3.183537 |
| C | 5.392111  | -1.614669 | 0.044408  |
| H | 6.179586  | -0.983367 | -0.378928 |
| H | 5.666489  | -1.825328 | 1.080110  |
| H | 5.392473  | -2.554893 | -0.509854 |
| C | -3.108906 | -1.601540 | -1.584475 |
| H | -4.090394 | -1.813952 | -2.025183 |
| H | -2.625254 | -0.841485 | -2.202693 |
| H | -2.516262 | -2.518385 | -1.652522 |
| C | -3.983259 | -2.235608 | 0.669989  |
| H | -4.125923 | -1.958368 | 1.718836  |
| H | -4.975921 | -2.428193 | 0.246389  |
| H | -3.428529 | -3.177573 | 0.644545  |
| C | -4.144755 | 0.134687  | -0.111615 |
| H | -4.325661 | 0.489175  | 0.906976  |
| H | -3.685477 | 0.951652  | -0.674319 |
| H | -5.121404 | -0.071258 | -0.565643 |

SMD(DCE)-CAM-B3LYP/6-311+G(d,p)

E = -1107.221441

Zero-point correction = 0.451166 (Hartree/Particle)

Thermal correction to Energy = 0.478452

Thermal correction to Enthalpy = 0.479396

Thermal correction to Gibbs Free Energy = 0.393619

Sum of electronic and zero-point Energies = -1106.770275

Sum of electronic and thermal Energies = -1106.742989

Sum of electronic and thermal Enthalpies = -1106.742045

Sum of electronic and thermal Free Energies = -1106.827822

|   |           |           |           |
|---|-----------|-----------|-----------|
| C | -1.053227 | 3.142312  | -0.592109 |
| C | 0.123423  | 2.455418  | -0.425744 |
| H | 1.047933  | 3.024660  | -0.387411 |
| C | 0.259477  | 1.069910  | -0.321271 |
| O | -0.854046 | 0.295393  | -0.437606 |
| C | 1.571268  | 0.390053  | -0.214789 |
| C | 2.439702  | 0.654887  | 0.860951  |
| C | 1.961395  | -0.529950 | -1.208169 |
| C | 3.660736  | -0.012225 | 0.929635  |

|    |           |           |           |
|----|-----------|-----------|-----------|
| C  | 3.192442  | -1.168035 | -1.101273 |
| C  | 4.057864  | -0.926697 | -0.038768 |
| H  | 4.316358  | 0.185514  | 1.772197  |
| H  | 3.487958  | -1.867597 | -1.877095 |
| C  | -1.136329 | 4.626486  | -0.725729 |
| H  | -1.573828 | 4.918842  | -1.687416 |
| H  | -1.779097 | 5.063358  | 0.047194  |
| H  | -0.151941 | 5.094001  | -0.648977 |
| Si | -1.583728 | -0.785357 | 0.642451  |
| C  | -1.716589 | 0.042276  | 2.313917  |
| H  | -2.352250 | -0.543021 | 2.985127  |
| H  | -0.734884 | 0.125429  | 2.788387  |
| H  | -2.139536 | 1.047135  | 2.241874  |
| C  | -0.575929 | -2.351685 | 0.802829  |
| H  | -1.043178 | -3.024124 | 1.528760  |
| H  | -0.486523 | -2.892734 | -0.142002 |
| H  | 0.432621  | -2.135845 | 1.163605  |
| C  | -3.280068 | -1.128580 | -0.134446 |
| H  | -1.981103 | 2.581949  | -0.642921 |
| C  | 2.091811  | 1.632181  | 1.954462  |
| H  | 2.302609  | 2.661737  | 1.652005  |
| H  | 1.035332  | 1.588277  | 2.221672  |
| H  | 2.683259  | 1.427924  | 2.848553  |
| C  | 1.092305  | -0.816050 | -2.404432 |
| H  | 0.266867  | -1.485075 | -2.153259 |
| H  | 0.648944  | 0.098474  | -2.804078 |
| H  | 1.677824  | -1.287606 | -3.195285 |
| C  | 5.396170  | -1.609206 | 0.042739  |
| H  | 6.181389  | -0.980744 | -0.388871 |
| H  | 5.675675  | -1.813619 | 1.078270  |
| H  | 5.394718  | -2.553333 | -0.504907 |
| C  | -3.115081 | -1.590578 | -1.589329 |
| H  | -4.097544 | -1.795875 | -2.031133 |
| H  | -2.628299 | -0.829128 | -2.203179 |
| H  | -2.527276 | -2.510008 | -1.663896 |
| C  | -3.987898 | -2.235097 | 0.663083  |
| H  | -4.129068 | -1.963729 | 1.713677  |
| H  | -4.981727 | -2.423322 | 0.240404  |
| H  | -3.436259 | -3.178680 | 0.631718  |
| C  | -4.144119 | 0.139822  | -0.105846 |
| H  | -4.321284 | 0.491541  | 0.914347  |
| H  | -3.684423 | 0.957056  | -0.667539 |
| H  | -5.122826 | -0.061052 | -0.557576 |

SMD(MeCN)-B3LYP/6-311+G(d,p)

E = -1107.718536

Zero-point correction = 0.446561 (Hartree/Particle)

Thermal correction to Energy = 0.473966

Thermal correction to Enthalpy = 0.474910

Thermal correction to Gibbs Free Energy = 0.389210

Sum of electronic and zero-point Energies = -1107.271974

Sum of electronic and thermal Energies = -1107.244570

Sum of electronic and thermal Enthalpies = -1107.243626

Sum of electronic and thermal Free Energies = -1107.329326

|    |           |           |           |
|----|-----------|-----------|-----------|
| C  | -1.025025 | 3.149465  | -0.605718 |
| C  | 0.146118  | 2.445254  | -0.428809 |
| H  | 1.076231  | 3.007080  | -0.394829 |
| C  | 0.275697  | 1.053084  | -0.315388 |
| O  | -0.846123 | 0.281039  | -0.436035 |
| C  | 1.590047  | 0.372367  | -0.210682 |
| C  | 2.474464  | 0.653503  | 0.860357  |
| C  | 1.980661  | -0.564124 | -1.200926 |
| C  | 3.703649  | -0.010676 | 0.925112  |
| C  | 3.221086  | -1.198032 | -1.094505 |
| C  | 4.099602  | -0.940313 | -0.038811 |
| H  | 4.364800  | 0.199471  | 1.761172  |
| H  | 3.513365  | -1.904422 | -1.866322 |
| C  | -1.089319 | 4.636541  | -0.756859 |
| H  | -1.520093 | 4.925056  | -1.725082 |
| H  | -1.733788 | 5.091126  | 0.007161  |
| H  | -0.099673 | 5.095529  | -0.679639 |
| Si | -1.621279 | -0.775443 | 0.655159  |
| C  | -1.766282 | 0.082177  | 2.321566  |
| H  | -2.398466 | -0.501667 | 2.999208  |
| H  | -0.784749 | 0.181355  | 2.796159  |
| H  | -2.200119 | 1.082370  | 2.235014  |
| C  | -0.635135 | -2.362830 | 0.855990  |
| H  | -1.123875 | -3.016478 | 1.586633  |
| H  | -0.541404 | -2.919926 | -0.080381 |
| H  | 0.372304  | -2.154734 | 1.228180  |
| C  | -3.326025 | -1.105637 | -0.146086 |
| H  | -1.962420 | 2.603311  | -0.654424 |
| C  | 2.133823  | 1.638382  | 1.955985  |
| H  | 2.308397  | 2.671687  | 1.638504  |
| H  | 1.086431  | 1.569996  | 2.257501  |
| H  | 2.757650  | 1.458437  | 2.834546  |
| C  | 1.111485  | -0.867284 | -2.399031 |
| H  | 0.282550  | -1.532480 | -2.143373 |
| H  | 0.671033  | 0.042623  | -2.815855 |
| H  | 1.699631  | -1.352019 | -3.181554 |
| C  | 5.445543  | -1.618066 | 0.040547  |
| H  | 6.230708  | -0.982762 | -0.385750 |
| H  | 5.726182  | -1.826911 | 1.076395  |
| H  | 5.450903  | -2.559764 | -0.513617 |
| C  | -3.155797 | -1.588688 | -1.601298 |
| H  | -4.138742 | -1.796715 | -2.044240 |
| H  | -2.665605 | -0.835867 | -2.224778 |
| H  | -2.569676 | -2.511224 | -1.663338 |
| C  | -4.057395 | -2.200515 | 0.661630  |
| H  | -4.203798 | -1.916040 | 1.709034  |
| H  | -5.051320 | -2.380530 | 0.232035  |
| H  | -3.516995 | -3.152030 | 0.645009  |
| C  | -4.181789 | 0.177737  | -0.138473 |
| H  | -4.368576 | 0.539781  | 0.877378  |
| H  | -3.708417 | 0.987797  | -0.701304 |
| H  | -5.158032 | -0.018243 | -0.600997 |



SMD(MeCN)-LC-BLYP/6-311+G(d,p)

E = -1104.982150  
Zero-point correction = 0.456969 (Hartree/Particle)  
Thermal correction to Energy = 0.483809  
Thermal correction to Enthalpy = 0.484753  
Thermal correction to Gibbs Free Energy = 0.399648  
Sum of electronic and zero-point Energies = -1104.525180  
Sum of electronic and thermal Energies = -1104.498340  
Sum of electronic and thermal Enthalpies = -1104.497396  
Sum of electronic and thermal Free Energies = -1104.582502

|    |           |           |           |
|----|-----------|-----------|-----------|
| C  | -1.089035 | 3.149863  | -0.584102 |
| C  | 0.093548  | 2.483357  | -0.440620 |
| H  | 1.012674  | 3.061175  | -0.410244 |
| C  | 0.234054  | 1.105971  | -0.342792 |
| O  | -0.871520 | 0.333210  | -0.441330 |
| C  | 1.535836  | 0.423009  | -0.233480 |
| C  | 2.398805  | 0.686904  | 0.832241  |
| C  | 1.904053  | -0.511926 | -1.204997 |
| C  | 3.600453  | 0.004519  | 0.912301  |
| C  | 3.115548  | -1.166628 | -1.090499 |
| C  | 3.978204  | -0.924796 | -0.037212 |
| H  | 4.258996  | 0.201795  | 1.752438  |
| H  | 3.397930  | -1.885166 | -1.853532 |
| C  | -1.194392 | 4.626576  | -0.704131 |
| H  | -1.655796 | 4.918771  | -1.652369 |
| H  | -1.824343 | 5.047157  | 0.085493  |
| H  | -0.215198 | 5.104647  | -0.644859 |
| Si | -1.525078 | -0.782535 | 0.635916  |
| C  | -1.660841 | 0.028638  | 2.297702  |
| H  | -2.281973 | -0.570184 | 2.968429  |
| H  | -0.678981 | 0.130077  | 2.765497  |
| H  | -2.104803 | 1.023320  | 2.226764  |
| C  | -0.457948 | -2.294041 | 0.757736  |
| H  | -0.884511 | -2.991684 | 1.482844  |
| H  | -0.368208 | -2.816610 | -0.196108 |
| H  | 0.546597  | -2.040785 | 1.101295  |
| C  | -3.199325 | -1.182100 | -0.109290 |
| H  | -2.007855 | 2.573333  | -0.620235 |
| C  | 2.059937  | 1.675384  | 1.906419  |
| H  | 2.267885  | 2.698296  | 1.585847  |
| H  | 1.005616  | 1.633578  | 2.178639  |
| H  | 2.655894  | 1.484367  | 2.798811  |
| C  | 1.024395  | -0.806040 | -2.380768 |
| H  | 0.208881  | -1.478354 | -2.110813 |
| H  | 0.568628  | 0.102668  | -2.776155 |
| H  | 1.600058  | -1.278119 | -3.176929 |
| C  | 5.296556  | -1.625625 | 0.056567  |
| H  | 6.092570  | -1.010423 | -0.370087 |
| H  | 5.563771  | -1.829905 | 1.094014  |
| H  | 5.283602  | -2.569746 | -0.488385 |
| C  | -3.028849 | -1.633962 | -1.554558 |
| H  | -4.005116 | -1.871286 | -1.990526 |

|   |           |           |           |
|---|-----------|-----------|-----------|
| H | -2.569515 | -0.856354 | -2.168038 |
| H | -2.410722 | -2.532073 | -1.631236 |
| C | -3.855497 | -2.302525 | 0.689737  |
| H | -3.992133 | -2.034680 | 1.740825  |
| H | -4.845849 | -2.523841 | 0.278566  |
| H | -3.272557 | -3.225863 | 0.652230  |
| C | -4.092902 | 0.051139  | -0.070350 |
| H | -4.274010 | 0.390594  | 0.952378  |
| H | -3.657708 | 0.883814  | -0.627653 |
| H | -5.066167 | -0.175025 | -0.518508 |

[1s]<sup>++</sup>

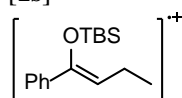

SMD(MeCN)-CAM-B3LYP/6-311+G(d,p)

E = -989.751559

Zero-point correction = 0.381320 (Hartree/Particle)

Thermal correction to Energy = 0.403829

Thermal correction to Enthalpy = 0.404773

Thermal correction to Gibbs Free Energy = 0.328706

Sum of electronic and zero-point Energies = -989.370238

Sum of electronic and thermal Energies = -989.347729

Sum of electronic and thermal Enthalpies = -989.346785

Sum of electronic and thermal Free Energies = -989.422853

|    |           |           |           |
|----|-----------|-----------|-----------|
| C  | 0.222431  | 3.248239  | -0.105760 |
| C  | 1.265742  | 2.213497  | -0.062076 |
| H  | 2.303276  | 2.522391  | -0.020395 |
| C  | 0.989873  | 0.828849  | -0.067152 |
| O  | -0.250241 | 0.462250  | -0.128013 |
| C  | 0.715152  | 4.595816  | -0.619743 |
| H  | 1.055923  | 4.519093  | -1.654434 |
| H  | -0.089827 | 5.331318  | -0.583573 |
| H  | 1.543942  | 4.969673  | -0.014727 |
| Si | -1.502794 | -0.382109 | 0.755576  |
| C  | -2.088630 | 0.863920  | 2.003065  |
| H  | -2.917062 | 0.448974  | 2.584963  |
| H  | -1.287293 | 1.114951  | 2.703558  |
| H  | -2.435946 | 1.784907  | 1.531233  |
| C  | -0.754825 | -1.867985 | 1.581285  |
| H  | -1.488194 | -2.285577 | 2.278400  |
| H  | -0.477867 | -2.654351 | 0.877582  |
| H  | 0.128468  | -1.598203 | 2.166024  |
| C  | -2.765211 | -0.797306 | -0.581824 |
| H  | -0.641700 | 2.886694  | -0.669116 |
| H  | -0.142363 | 3.356337  | 0.929970  |
| C  | -3.864791 | -1.661442 | 0.059217  |
| H  | -4.625632 | -1.900844 | -0.691636 |
| H  | -3.472552 | -2.607624 | 0.442332  |
| H  | -4.369834 | -1.146469 | 0.881709  |
| C  | -3.395043 | 0.483679  | -1.146311 |
| H  | -3.922789 | 1.052644  | -0.376565 |

|   |           |           |           |
|---|-----------|-----------|-----------|
| H | -2.649153 | 1.141023  | -1.601503 |
| H | -4.123593 | 0.224691  | -1.922543 |
| C | -2.108156 | -1.586275 | -1.722715 |
| H | -1.343755 | -0.998521 | -2.237481 |
| H | -1.646235 | -2.512580 | -1.370469 |
| H | -2.867584 | -1.860088 | -2.463491 |
| C | 2.050456  | -0.164353 | -0.101829 |
| C | 1.795311  | -1.426738 | -0.660785 |
| C | 3.331326  | 0.119994  | 0.401655  |
| C | 2.796623  | -2.376156 | -0.717391 |
| C | 4.319991  | -0.844663 | 0.361553  |
| C | 4.057176  | -2.089922 | -0.200713 |
| H | 2.600034  | -3.341202 | -1.167799 |
| H | 5.299570  | -0.627446 | 0.768795  |
| H | 0.822998  | -1.643104 | -1.081637 |
| H | 3.544667  | 1.079166  | 0.854537  |
| H | 4.839000  | -2.839266 | -0.240537 |

SMD(MeCN)-B3LYP/6-311+G(d,p)

E = -990.180251

Zero-point correction = 0.377297 (Hartree/Particle)

Thermal correction to Energy = 0.400139

Thermal correction to Enthalpy = 0.401083

Thermal correction to Gibbs Free Energy = 0.323090

Sum of electronic and zero-point Energies = -989.802953

Sum of electronic and thermal Energies = -989.780111

Sum of electronic and thermal Enthalpies = -989.779167

Sum of electronic and thermal Free Energies = -989.857161

|    |           |           |           |
|----|-----------|-----------|-----------|
| C  | 0.245983  | 3.262705  | -0.036849 |
| C  | 1.273166  | 2.206672  | 0.007627  |
| H  | 2.309476  | 2.513815  | 0.085528  |
| C  | 1.003071  | 0.820026  | -0.044697 |
| O  | -0.241228 | 0.435250  | -0.150249 |
| C  | 0.713059  | 4.541572  | -0.744959 |
| H  | 0.925333  | 4.347828  | -1.799401 |
| H  | -0.066966 | 5.304064  | -0.689884 |
| H  | 1.617532  | 4.943750  | -0.281028 |
| Si | -1.523112 | -0.355606 | 0.752086  |
| C  | -2.118805 | 0.939736  | 1.961307  |
| H  | -2.955656 | 0.544254  | 2.546881  |
| H  | -1.322512 | 1.206335  | 2.663583  |
| H  | -2.457119 | 1.850005  | 1.460980  |
| C  | -0.795158 | -1.823593 | 1.649837  |
| H  | -1.553786 | -2.234847 | 2.325166  |
| H  | -0.475426 | -2.623269 | 0.978175  |
| H  | 0.058926  | -1.527044 | 2.266421  |
| C  | -2.792573 | -0.813546 | -0.586677 |
| H  | -0.685557 | 2.881218  | -0.459495 |
| H  | 0.017208  | 3.505768  | 1.017070  |
| C  | -3.913507 | -1.636897 | 0.088811  |
| H  | -4.676309 | -1.895136 | -0.655716 |
| H  | -3.538211 | -2.573681 | 0.512304  |
| H  | -4.414351 | -1.080423 | 0.887691  |

|   |           |           |           |
|---|-----------|-----------|-----------|
| C | -3.406275 | 0.455482  | -1.213124 |
| H | -3.926547 | 1.068101  | -0.470945 |
| H | -2.651145 | 1.080418  | -1.699582 |
| H | -4.139757 | 0.170812  | -1.977497 |
| C | -2.141117 | -1.665276 | -1.695245 |
| H | -1.366793 | -1.111751 | -2.234264 |
| H | -1.692823 | -2.582990 | -1.302559 |
| H | -2.903742 | -1.960662 | -2.426477 |
| C | 2.073981  | -0.165071 | -0.091365 |
| C | 1.826867  | -1.435277 | -0.658608 |
| C | 3.365190  | 0.123220  | 0.410898  |
| C | 2.837656  | -2.379522 | -0.725996 |
| C | 4.362782  | -0.837308 | 0.359390  |
| C | 4.105647  | -2.086727 | -0.212266 |
| H | 2.646216  | -3.343551 | -1.182220 |
| H | 5.343029  | -0.616329 | 0.764554  |
| H | 0.853657  | -1.656193 | -1.075478 |
| H | 3.575836  | 1.079127  | 0.872352  |
| H | 4.893064  | -2.830320 | -0.261882 |

SMD(MeCN)-LC-BLYP/6-311+G(d,p)

E = -987.806410

Zero-point correction = 0.386247 (Hartree/Particle)

Thermal correction to Energy = 0.408449

Thermal correction to Enthalpy = 0.409394

Thermal correction to Gibbs Free Energy = 0.333502

Sum of electronic and zero-point Energies = -987.420163

Sum of electronic and thermal Energies = -987.397961

Sum of electronic and thermal Enthalpies = -987.397016

Sum of electronic and thermal Free Energies = -987.472908

|    |           |           |           |
|----|-----------|-----------|-----------|
| C  | 0.155081  | 3.211712  | -0.188915 |
| C  | 1.231428  | 2.221272  | -0.170068 |
| H  | 2.263780  | 2.547840  | -0.217731 |
| C  | 0.972884  | 0.840931  | -0.101682 |
| O  | -0.254754 | 0.476648  | -0.087479 |
| C  | 0.627274  | 4.625984  | -0.437841 |
| H  | 1.121592  | 4.709222  | -1.406865 |
| H  | -0.214725 | 5.317849  | -0.430278 |
| H  | 1.332261  | 4.945942  | 0.330904  |
| Si | -1.481045 | -0.422283 | 0.759523  |
| C  | -2.076799 | 0.766597  | 2.033315  |
| H  | -2.896630 | 0.323498  | 2.604215  |
| H  | -1.278604 | 1.009567  | 2.738246  |
| H  | -2.438309 | 1.694116  | 1.588077  |
| C  | -0.719936 | -1.916132 | 1.521436  |
| H  | -1.436397 | -2.346911 | 2.225961  |
| H  | -0.465713 | -2.684806 | 0.791870  |
| H  | 0.178361  | -1.664196 | 2.088738  |
| C  | -2.718038 | -0.796454 | -0.585772 |
| H  | -0.594879 | 2.898714  | -0.923803 |
| H  | -0.370684 | 3.136400  | 0.773506  |
| C  | -3.810191 | -1.677519 | 0.015011  |
| H  | -4.562604 | -1.900131 | -0.747467 |

|   |           |           |           |
|---|-----------|-----------|-----------|
| H | -3.415573 | -2.631195 | 0.374225  |
| H | -4.323933 | -1.188816 | 0.846930  |
| C | -3.338604 | 0.492998  | -1.108704 |
| H | -3.878443 | 1.031532  | -0.326875 |
| H | -2.587752 | 1.168234  | -1.526523 |
| H | -4.053546 | 0.262416  | -1.904423 |
| C | -2.049370 | -1.540191 | -1.735089 |
| H | -1.281135 | -0.933870 | -2.220430 |
| H | -1.588516 | -2.475087 | -1.407251 |
| H | -2.796921 | -1.792008 | -2.493420 |
| C | 2.034933  | -0.145937 | -0.120528 |
| C | 1.779738  | -1.416570 | -0.626662 |
| C | 3.306702  | 0.166137  | 0.352530  |
| C | 2.780740  | -2.356953 | -0.659722 |
| C | 4.296861  | -0.787115 | 0.336773  |
| C | 4.036253  | -2.045668 | -0.171497 |
| H | 2.584816  | -3.339771 | -1.070217 |
| H | 5.280333  | -0.548102 | 0.721853  |
| H | 0.803223  | -1.655236 | -1.026541 |
| H | 3.516798  | 1.146768  | 0.760012  |
| H | 4.822133  | -2.791732 | -0.191720 |

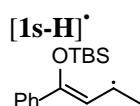

CAM-B3LYP/6-311+G(d,p)

E = -989.307159

Zero-point correction = 0.369576 (Hartree/Particle)

Thermal correction to Energy = 0.391750

Thermal correction to Enthalpy = 0.392694

Thermal correction to Gibbs Free Energy = 0.316792

Sum of electronic and zero-point Energies = -988.937583

Sum of electronic and thermal Energies = -988.915409

Sum of electronic and thermal Enthalpies = -988.914464

Sum of electronic and thermal Free Energies = -988.990367

|   |           |           |           |
|---|-----------|-----------|-----------|
| C | 0.006414  | 3.100948  | -0.360052 |
| C | 1.045926  | 2.239513  | -0.190457 |
| H | 2.037820  | 2.660297  | -0.067809 |
| C | 0.958767  | 0.833305  | -0.212413 |
| O | -0.257214 | 0.262833  | -0.432510 |
| C | 2.107603  | -0.051706 | -0.163565 |
| C | 3.357825  | 0.368764  | 0.326813  |
| C | 2.000644  | -1.374733 | -0.624495 |
| C | 4.440081  | -0.491542 | 0.349109  |
| H | 3.477923  | 1.371492  | 0.715772  |
| C | 3.089397  | -2.229271 | -0.602988 |
| H | 1.054284  | -1.714165 | -1.022174 |
| C | 4.316802  | -1.797096 | -0.115835 |
| H | 5.389143  | -0.143861 | 0.740209  |
| H | 2.981091  | -3.241464 | -0.975252 |
| H | 5.167077  | -2.467744 | -0.096929 |
| C | 0.143416  | 4.587238  | -0.362977 |

|    |           |           |           |
|----|-----------|-----------|-----------|
| H  | -0.187933 | 5.014878  | -1.315151 |
| H  | -0.475854 | 5.046067  | 0.415254  |
| H  | 1.176925  | 4.897266  | -0.196686 |
| Si | -1.394505 | -0.347228 | 0.657769  |
| C  | -1.938995 | 1.007389  | 1.829777  |
| H  | -2.603478 | 0.603146  | 2.598224  |
| H  | -1.075474 | 1.443496  | 2.337989  |
| H  | -2.465493 | 1.816619  | 1.321511  |
| C  | -0.645157 | -1.737075 | 1.662499  |
| H  | -1.358579 | -2.092563 | 2.411017  |
| H  | -0.349008 | -2.587997 | 1.047430  |
| H  | 0.244822  | -1.392561 | 2.194752  |
| C  | -2.798739 | -0.941273 | -0.466888 |
| H  | -0.984453 | 2.693484  | -0.526240 |
| C  | -3.926978 | -1.538911 | 0.387918  |
| H  | -4.744502 | -1.882031 | -0.255738 |
| H  | -3.589026 | -2.400761 | 0.969944  |
| H  | -4.347418 | -0.806960 | 1.083233  |
| C  | -3.350482 | 0.237583  | -1.282263 |
| H  | -3.777032 | 1.014148  | -0.641722 |
| H  | -2.574241 | 0.695174  | -1.899618 |
| H  | -4.148294 | -0.107465 | -1.949603 |
| C  | -2.275454 | -2.012240 | -1.435472 |
| H  | -1.895946 | -2.891694 | -0.908295 |
| H  | -3.083522 | -2.351287 | -2.093465 |
| H  | -1.474475 | -1.622357 | -2.067609 |

SMD(MeCN)-CAM-B3LYP/6-311+G(d,p)

E = -989.323061

Zero-point correction = 0.368144 (Hartree/Particle)

Thermal correction to Energy = 0.390288

Thermal correction to Enthalpy = 0.391232

Thermal correction to Gibbs Free Energy = 0.316498

Sum of electronic and zero-point Energies = -988.954917

Sum of electronic and thermal Energies = -988.932773

Sum of electronic and thermal Enthalpies = -988.931829

Sum of electronic and thermal Free Energies = -989.006563

|   |           |           |           |
|---|-----------|-----------|-----------|
| C | -0.016982 | 3.073056  | -0.346000 |
| C | 1.035722  | 2.227010  | -0.176434 |
| H | 2.018503  | 2.665614  | -0.041974 |
| C | 0.969157  | 0.816161  | -0.202693 |
| O | -0.234569 | 0.226372  | -0.426942 |
| C | 2.134026  | -0.048200 | -0.158435 |
| C | 3.398213  | 0.412532  | 0.263108  |
| C | 2.031259  | -1.395312 | -0.552835 |
| C | 4.494291  | -0.431933 | 0.281462  |
| H | 3.522921  | 1.434858  | 0.595648  |
| C | 3.134901  | -2.233017 | -0.535808 |
| H | 1.075869  | -1.774125 | -0.888800 |
| C | 4.374849  | -1.761109 | -0.118448 |
| H | 5.452526  | -0.052011 | 0.617528  |
| H | 3.026678  | -3.264089 | -0.853496 |
| H | 5.236271  | -2.418203 | -0.102641 |

|    |           |           |           |
|----|-----------|-----------|-----------|
| C  | 0.097979  | 4.560481  | -0.334818 |
| H  | -0.244728 | 4.991134  | -1.282224 |
| H  | -0.532491 | 4.999619  | 0.446501  |
| H  | 1.126333  | 4.886538  | -0.165083 |
| Si | -1.406712 | -0.361428 | 0.651445  |
| C  | -1.937431 | 0.999691  | 1.817163  |
| H  | -2.602169 | 0.591215  | 2.584454  |
| H  | -1.074393 | 1.430209  | 2.332991  |
| H  | -2.467286 | 1.809400  | 1.311547  |
| C  | -0.693752 | -1.763027 | 1.662060  |
| H  | -1.444332 | -2.131855 | 2.368164  |
| H  | -0.367415 | -2.605394 | 1.049300  |
| H  | 0.162680  | -1.421479 | 2.250481  |
| C  | -2.813226 | -0.928516 | -0.483723 |
| H  | -1.005386 | 2.656890  | -0.508780 |
| C  | -3.989905 | -1.408877 | 0.380148  |
| H  | -4.809729 | -1.750074 | -0.262591 |
| H  | -3.712681 | -2.247159 | 1.026164  |
| H  | -4.384103 | -0.610852 | 1.015918  |
| C  | -3.283973 | 0.233816  | -1.369004 |
| H  | -3.646817 | 1.079543  | -0.778204 |
| H  | -2.484361 | 0.595902  | -2.019871 |
| H  | -4.110506 | -0.095189 | -2.010137 |
| C  | -2.345003 | -2.082415 | -1.381200 |
| H  | -2.024939 | -2.951360 | -0.799712 |
| H  | -3.166342 | -2.407900 | -2.030668 |
| H  | -1.514336 | -1.784257 | -2.026469 |

SMD(DCE)-CAM-B3LYP/6-311+G(d,p)

E = -989.323605

Zero-point correction = 0.368431 (Hartree/Particle)

Thermal correction to Energy = 0.390546

Thermal correction to Enthalpy = 0.391490

Thermal correction to Gibbs Free Energy = 0.316962

Sum of electronic and zero-point Energies = -988.955174

Sum of electronic and thermal Energies = -988.933059

Sum of electronic and thermal Enthalpies = -988.932114

Sum of electronic and thermal Free Energies = -989.006642

|   |           |           |           |
|---|-----------|-----------|-----------|
| C | -0.013616 | 3.076156  | -0.346179 |
| C | 1.037214  | 2.227725  | -0.177401 |
| H | 2.021688  | 2.663866  | -0.047757 |
| C | 0.968633  | 0.817495  | -0.201188 |
| O | -0.236542 | 0.228828  | -0.422376 |
| C | 2.132628  | -0.048470 | -0.158405 |
| C | 3.394455  | 0.406947  | 0.274407  |
| C | 2.030468  | -1.391626 | -0.564690 |
| C | 4.489369  | -0.438791 | 0.291929  |
| H | 3.517646  | 1.426111  | 0.617007  |
| C | 3.132733  | -2.230763 | -0.548589 |
| H | 1.076483  | -1.764880 | -0.910614 |
| C | 4.370501  | -1.764063 | -0.119826 |
| H | 5.446054  | -0.063140 | 0.636900  |
| H | 3.025396  | -3.258753 | -0.876210 |

|    |           |           |           |
|----|-----------|-----------|-----------|
| H  | 5.230943  | -2.422356 | -0.104635 |
| C  | 0.105025  | 4.563278  | -0.340346 |
| H  | -0.236749 | 4.991530  | -1.289150 |
| H  | -0.522908 | 5.007515  | 0.440102  |
| H  | 1.134316  | 4.887589  | -0.172981 |
| Si | -1.406864 | -0.362254 | 0.654113  |
| C  | -1.939503 | 0.994997  | 1.824014  |
| H  | -2.599245 | 0.584012  | 2.594241  |
| H  | -1.076247 | 1.428651  | 2.336729  |
| H  | -2.474307 | 1.804395  | 1.323186  |
| C  | -0.694028 | -1.765361 | 1.663128  |
| H  | -1.443102 | -2.136111 | 2.369824  |
| H  | -0.366264 | -2.607421 | 1.050816  |
| H  | 0.162709  | -1.424913 | 2.251582  |
| C  | -2.812332 | -0.927248 | -0.484005 |
| H  | -1.002836 | 2.661489  | -0.507024 |
| C  | -3.987768 | -1.418069 | 0.375409  |
| H  | -4.807287 | -1.755327 | -0.269693 |
| H  | -3.709163 | -2.261839 | 1.013596  |
| H  | -4.384299 | -0.627212 | 1.018684  |
| C  | -3.286311 | 0.239380  | -1.361964 |
| H  | -3.657853 | 1.077860  | -0.766244 |
| H  | -2.486012 | 0.611660  | -2.006070 |
| H  | -4.107865 | -0.088916 | -2.009727 |
| C  | -2.338952 | -2.072509 | -1.389816 |
| H  | -2.014230 | -2.944263 | -0.815155 |
| H  | -3.158704 | -2.398125 | -2.041111 |
| H  | -1.510815 | -1.764954 | -2.033742 |

SMD(MeCN)-B3LYP/6-311+G(d,p)

E = -989.747649

Zero-point correction = 0.364581 (Hartree/Particle)

Thermal correction to Energy = 0.386917

Thermal correction to Enthalpy = 0.387861

Thermal correction to Gibbs Free Energy = 0.312954

Sum of electronic and zero-point Energies = -989.383067

Sum of electronic and thermal Energies = -989.360732

Sum of electronic and thermal Enthalpies = -989.359787

Sum of electronic and thermal Free Energies = -989.434695

|   |           |           |           |
|---|-----------|-----------|-----------|
| C | 0.028022  | 3.097563  | -0.345651 |
| C | 1.066451  | 2.224246  | -0.176664 |
| H | 2.058642  | 2.645631  | -0.050563 |
| C | 0.981929  | 0.809688  | -0.196391 |
| O | -0.233430 | 0.229370  | -0.414894 |
| C | 2.142257  | -0.064461 | -0.154561 |
| C | 3.418134  | 0.388363  | 0.266989  |
| C | 2.033646  | -1.418398 | -0.552766 |
| C | 4.513324  | -0.465219 | 0.280960  |
| H | 3.550378  | 1.409099  | 0.603335  |
| C | 3.137091  | -2.264222 | -0.540374 |
| H | 1.076515  | -1.793316 | -0.889236 |
| C | 4.386386  | -1.798695 | -0.123372 |
| H | 5.474568  | -0.090671 | 0.616917  |



|    |           |           |           |
|----|-----------|-----------|-----------|
| H  | 3.022404  | -3.294469 | -0.861080 |
| H  | 5.244851  | -2.460756 | -0.111102 |
| C  | 0.176379  | 4.585405  | -0.341920 |
| H  | -0.163853 | 5.021517  | -1.289997 |
| H  | -0.442093 | 5.043735  | 0.440740  |
| H  | 1.212843  | 4.892455  | -0.178909 |
| Si | -1.426743 | -0.354176 | 0.660002  |
| C  | -1.954732 | 1.015777  | 1.833375  |
| H  | -2.635517 | 0.612731  | 2.591152  |
| H  | -1.090226 | 1.429779  | 2.362569  |
| H  | -2.466711 | 1.837854  | 1.327090  |
| C  | -0.731530 | -1.768906 | 1.684021  |
| H  | -1.491709 | -2.127369 | 2.387013  |
| H  | -0.409988 | -2.618249 | 1.076435  |
| H  | 0.125241  | -1.434485 | 2.278166  |
| C  | -2.840719 | -0.912420 | -0.495696 |
| H  | -0.971804 | 2.705684  | -0.502532 |
| C  | -4.025717 | -1.401025 | 0.365931  |
| H  | -4.847116 | -1.732305 | -0.282216 |
| H  | -3.752444 | -2.248787 | 1.002745  |
| H  | -4.419268 | -0.609201 | 1.011425  |
| C  | -3.311669 | 0.262739  | -1.376904 |
| H  | -3.674858 | 1.105630  | -0.780562 |
| H  | -2.511314 | 0.629603  | -2.025815 |
| H  | -4.138839 | -0.060803 | -2.022269 |
| C  | -2.372236 | -2.065426 | -1.406966 |
| H  | -2.048045 | -2.939131 | -0.833136 |
| H  | -3.197050 | -2.388426 | -2.055547 |
| H  | -1.544845 | -1.762301 | -2.055564 |

SMD(MeCN)-LC-BLYP/6-311+G(d,p)

E = -987.384363

Zero-point correction = 0.372957 (Hartree/Particle)

Thermal correction to Energy = 0.394782

Thermal correction to Enthalpy = 0.395727

Thermal correction to Gibbs Free Energy = 0.321089

Sum of electronic and zero-point Energies = -987.011405

Sum of electronic and thermal Energies = -986.989580

Sum of electronic and thermal Enthalpies = -986.988636

Sum of electronic and thermal Free Energies = -987.063273

|   |           |           |           |
|---|-----------|-----------|-----------|
| C | -0.083440 | 3.024449  | -0.337330 |
| C | 0.989129  | 2.221111  | -0.162536 |
| H | 1.954206  | 2.689339  | -0.005775 |
| C | 0.958472  | 0.814900  | -0.204350 |
| O | -0.226269 | 0.205236  | -0.430232 |
| C | 2.131733  | -0.024235 | -0.159558 |
| C | 3.390034  | 0.465521  | 0.213083  |
| C | 2.037827  | -1.375281 | -0.505760 |
| C | 4.490282  | -0.359024 | 0.236227  |
| H | 3.509609  | 1.501543  | 0.501927  |
| C | 3.145614  | -2.193598 | -0.484282 |
| H | 1.079433  | -1.775364 | -0.807071 |
| C | 4.379966  | -1.694843 | -0.112584 |

|    |           |           |           |
|----|-----------|-----------|-----------|
| H  | 5.451097  | 0.044166  | 0.535115  |
| H  | 3.044570  | -3.236059 | -0.764219 |
| H  | 5.250188  | -2.339917 | -0.093456 |
| C  | -0.024077 | 4.507550  | -0.304489 |
| H  | -0.368318 | 4.936805  | -1.249720 |
| H  | -0.679173 | 4.910461  | 0.473454  |
| H  | 0.988719  | 4.866430  | -0.116165 |
| Si | -1.388975 | -0.379200 | 0.640877  |
| C  | -1.917812 | 0.970057  | 1.796630  |
| H  | -2.573715 | 0.557818  | 2.567472  |
| H  | -1.056175 | 1.408356  | 2.305313  |
| H  | -2.456469 | 1.772518  | 1.291393  |
| C  | -0.675991 | -1.772158 | 1.635136  |
| H  | -1.420979 | -2.142527 | 2.344141  |
| H  | -0.354508 | -2.610890 | 1.016953  |
| H  | 0.183967  | -1.432370 | 2.217048  |
| C  | -2.780800 | -0.939722 | -0.482259 |
| H  | -1.051896 | 2.571959  | -0.521491 |
| C  | -3.953469 | -1.407692 | 0.372639  |
| H  | -4.770342 | -1.751374 | -0.270191 |
| H  | -3.680660 | -2.240857 | 1.025628  |
| H  | -4.347526 | -0.604319 | 1.000129  |
| C  | -3.235029 | 0.215644  | -1.365402 |
| H  | -3.593623 | 1.064255  | -0.777773 |
| H  | -2.428707 | 0.569922  | -2.010737 |
| H  | -4.059565 | -0.107481 | -2.009647 |
| C  | -2.312552 | -2.089324 | -1.365436 |
| H  | -2.009316 | -2.959098 | -0.777999 |
| H  | -3.125051 | -2.408039 | -2.026863 |
| H  | -1.469293 | -1.798503 | -1.996247 |

4-methoxyaniline

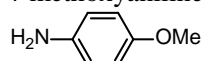

SMD(MeCN)-CAM-B3LYP/6-311+G(d,p)

E = -402.046061

Zero-point correction = 0.150114 (Hartree/Particle)

Thermal correction to Energy = 0.158503

Thermal correction to Enthalpy = 0.159447

Thermal correction to Gibbs Free Energy = 0.117168

Sum of electronic and zero-point Energies = -401.895947

Sum of electronic and thermal Energies = -401.887558

Sum of electronic and thermal Enthalpies = -401.886614

Sum of electronic and thermal Free Energies = -401.928893

|   |           |           |           |
|---|-----------|-----------|-----------|
| C | 0.069494  | 1.373008  | -0.000467 |
| C | 0.942706  | 0.286240  | 0.000582  |
| C | 0.417800  | -1.000568 | -0.002941 |
| C | -0.962506 | -1.190908 | -0.008798 |
| C | -1.841681 | -0.112299 | -0.010705 |
| C | -1.299850 | 1.177524  | -0.007108 |
| H | 0.479903  | 2.376208  | 0.005421  |
| H | 1.064437  | -1.867559 | 0.000297  |

|   |           |           |           |
|---|-----------|-----------|-----------|
| H | -1.357373 | -2.201440 | -0.011520 |
| H | -1.964554 | 2.035024  | -0.008288 |
| N | -3.229003 | -0.306503 | -0.075212 |
| H | -3.541673 | -1.190996 | 0.303724  |
| H | -3.771757 | 0.458487  | 0.303878  |
| O | 2.276885  | 0.580450  | 0.007696  |
| C | 3.195857  | -0.501244 | 0.005472  |
| H | 4.188597  | -0.054944 | 0.013739  |
| H | 3.075143  | -1.127631 | 0.894005  |
| H | 3.084305  | -1.115743 | -0.892557 |

SMD(MeCN)-B3LYP/6-311+G(d,p)

E = -402.256493  
 Zero-point correction = 0.148377 (Hartree/Particle)  
 Thermal correction to Energy = 0.156913  
 Thermal correction to Enthalpy = 0.157857  
 Thermal correction to Gibbs Free Energy = 0.115208  
 Sum of electronic and zero-point Energies = -402.108117  
 Sum of electronic and thermal Energies = -402.099581  
 Sum of electronic and thermal Enthalpies = -402.098636  
 Sum of electronic and thermal Free Energies = -402.141285

|   |           |           |           |
|---|-----------|-----------|-----------|
| C | 0.069701  | 1.377589  | -0.000015 |
| C | 0.946878  | 0.285830  | 0.000462  |
| C | 0.416749  | -1.006457 | -0.001878 |
| C | -0.968503 | -1.196787 | -0.006367 |
| C | -1.852172 | -0.112423 | -0.008436 |
| C | -1.305367 | 1.182434  | -0.005299 |
| H | 0.479453  | 2.381829  | 0.005847  |
| H | 1.062579  | -1.874831 | 0.001837  |
| H | -1.362938 | -2.208194 | -0.007805 |
| H | -1.968268 | 2.042083  | -0.005615 |
| N | -3.242326 | -0.305965 | -0.078495 |
| H | -3.557838 | -1.190531 | 0.300774  |
| H | -3.786829 | 0.459716  | 0.299518  |
| O | 2.286277  | 0.582167  | 0.006544  |
| C | 3.214636  | -0.502050 | 0.003718  |
| H | 4.204879  | -0.048132 | 0.011675  |
| H | 3.097585  | -1.129323 | 0.893217  |
| H | 3.105911  | -1.117016 | -0.895438 |

SMD(MeCN)-LC-BLYP/6-311+G(d,p)

E = -401.134707  
 Zero-point correction = 0.152197 (Hartree/Particle)  
 Thermal correction to Energy = 0.160424  
 Thermal correction to Enthalpy = 0.161368  
 Thermal correction to Gibbs Free Energy = 0.119473  
 Sum of electronic and zero-point Energies = -400.982510  
 Sum of electronic and thermal Energies = -400.974283  
 Sum of electronic and thermal Enthalpies = -400.973339  
 Sum of electronic and thermal Free Energies = -401.015234

|   |          |           |           |
|---|----------|-----------|-----------|
| C | 0.067541 | 1.365647  | -0.001222 |
| C | 0.936453 | 0.286522  | 0.000261  |
| C | 0.417668 | -0.991449 | -0.004503 |

|   |           |           |           |
|---|-----------|-----------|-----------|
| C | -0.954567 | -1.182213 | -0.011305 |
| C | -1.828187 | -0.112787 | -0.013064 |
| C | -1.291744 | 1.170016  | -0.008854 |
| H | 0.479432  | 2.368091  | 0.004815  |
| H | 1.065826  | -1.857283 | -0.001878 |
| H | -1.349419 | -2.192546 | -0.015150 |
| H | -1.958961 | 2.025379  | -0.010601 |
| N | -3.208155 | -0.306489 | -0.066662 |
| H | -3.525551 | -1.196212 | 0.295028  |
| H | -3.757466 | 0.460667  | 0.297633  |
| O | 2.263461  | 0.576178  | 0.008427  |
| C | 3.172485  | -0.497878 | 0.006911  |
| H | 4.168746  | -0.061119 | 0.016556  |
| H | 3.048748  | -1.125376 | 0.893589  |
| H | 3.060155  | -1.112756 | -0.890121 |

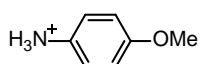

SMD(MeCN)-CAM-B3LYP/6-311+G(d,p)

E = -402.496278

Zero-point correction = 0.165212 (Hartree/Particle)

Thermal correction to Energy = 0.173838

Thermal correction to Enthalpy = 0.174782

Thermal correction to Gibbs Free Energy = 0.131600

Sum of electronic and zero-point Energies = -402.331066

Sum of electronic and thermal Energies = -402.322440

Sum of electronic and thermal Enthalpies = -402.321496

Sum of electronic and thermal Free Energies = -402.364678

|   |           |           |           |
|---|-----------|-----------|-----------|
| C | -0.130837 | 1.385611  | -0.003398 |
| C | -0.991735 | 0.284972  | -0.001602 |
| C | -0.468296 | -1.006912 | -0.007834 |
| C | 0.909228  | -1.190906 | -0.011261 |
| C | 1.742244  | -0.091698 | -0.009606 |
| C | 1.237029  | 1.198854  | -0.006658 |
| H | -0.551662 | 2.383208  | -0.003853 |
| H | -1.114215 | -1.873157 | -0.012002 |
| H | 1.320882  | -2.193580 | -0.017432 |
| H | 1.906948  | 2.051063  | -0.009149 |
| N | 3.196940  | -0.289290 | 0.015535  |
| H | 3.475113  | -1.120632 | -0.515550 |
| H | 3.689678  | 0.510590  | -0.394426 |
| H | 3.550934  | -0.405329 | 0.971394  |
| O | -2.312064 | 0.569361  | 0.003170  |
| C | -3.243235 | -0.509698 | 0.009284  |
| H | -4.229262 | -0.050779 | 0.022161  |
| H | -3.138286 | -1.122819 | -0.888966 |
| H | -3.118586 | -1.129754 | 0.900177  |

SMD(MeCN)-B3LYP/6-311+G(d,p)

E = -402.708387

Zero-point correction = 0.163494 (Hartree/Particle)

Thermal correction to Energy = 0.172242

Thermal correction to Enthalpy = 0.173187  
 Thermal correction to Gibbs Free Energy = 0.129762  
 Sum of electronic and zero-point Energies = -402.544893  
 Sum of electronic and thermal Energies = -402.536144  
 Sum of electronic and thermal Enthalpies = -402.535200  
 Sum of electronic and thermal Free Energies = -402.578624

|   |           |           |           |
|---|-----------|-----------|-----------|
| C | -0.131668 | 1.389907  | -0.003438 |
| C | -0.996068 | 0.284299  | -0.001388 |
| C | -0.467659 | -1.012939 | -0.007546 |
| C | 0.915012  | -1.196997 | -0.011076 |
| C | 1.750232  | -0.091752 | -0.010112 |
| C | 1.242134  | 1.203281  | -0.006814 |
| H | -0.551158 | 2.388679  | -0.004216 |
| H | -1.112735 | -1.880439 | -0.011809 |
| H | 1.326939  | -2.200041 | -0.017046 |
| H | 1.910803  | 2.056997  | -0.009388 |
| N | 3.211965  | -0.288328 | 0.015691  |
| H | 3.491511  | -1.119855 | -0.515369 |
| H | 3.703805  | 0.512370  | -0.394872 |
| H | 3.567639  | -0.403851 | 0.971821  |
| O | -2.321289 | 0.571325  | 0.003354  |
| C | -3.262501 | -0.510497 | 0.009032  |
| H | -4.245571 | -0.043104 | 0.023240  |
| H | -3.161324 | -1.122834 | -0.891257 |
| H | -3.140251 | -1.132038 | 0.900275  |

SMD(MeCN)-LC-BLYP/6-311+G(d,p)

E = -401.581557  
 Zero-point correction = 0.167156 (Hartree/Particle)  
 Thermal correction to Energy = 0.175647  
 Thermal correction to Enthalpy = 0.176591  
 Thermal correction to Gibbs Free Energy = 0.133569  
 Sum of electronic and zero-point Energies = -401.414402  
 Sum of electronic and thermal Energies = -401.405910  
 Sum of electronic and thermal Enthalpies = -401.404966  
 Sum of electronic and thermal Free Energies = -401.447988

|   |           |           |           |
|---|-----------|-----------|-----------|
| C | -0.128645 | 1.378823  | -0.003670 |
| C | -0.984715 | 0.285547  | -0.001962 |
| C | -0.467640 | -0.997952 | -0.008164 |
| C | 0.901568  | -1.181531 | -0.011390 |
| C | 1.731487  | -0.091795 | -0.009010 |
| C | 1.229366  | 1.191772  | -0.006663 |
| H | -0.551360 | 2.375631  | -0.004047 |
| H | -1.115086 | -1.863179 | -0.012242 |
| H | 1.312758  | -2.184650 | -0.017680 |
| H | 1.901071  | 2.042893  | -0.009137 |
| N | 3.175256  | -0.290327 | 0.015555  |
| H | 3.452851  | -1.124242 | -0.514627 |
| H | 3.670856  | 0.508964  | -0.395913 |
| H | 3.528803  | -0.405392 | 0.973089  |
| O | -2.298374 | 0.565101  | 0.002897  |
| C | -3.219057 | -0.506876 | 0.009727  |
| H | -4.209054 | -0.057902 | 0.022494  |

|   |           |           |           |
|---|-----------|-----------|-----------|
| H | -3.112434 | -1.121385 | -0.886863 |
| H | -3.092394 | -1.127184 | 0.899651  |

aniline

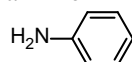

SMD(MeCN)-CAM-B3LYP/6-311+G(d,p)

E = -287.535878

Zero-point correction = 0.117603 (Hartree/Particle)

Thermal correction to Energy = 0.123343

Thermal correction to Enthalpy = 0.124287

Thermal correction to Gibbs Free Energy = 0.088496

Sum of electronic and zero-point Energies = -287.418275

Sum of electronic and thermal Energies = -287.412535

Sum of electronic and thermal Enthalpies = -287.411591

Sum of electronic and thermal Free Energies = -287.447382

|   |           |           |           |
|---|-----------|-----------|-----------|
| C | -1.166701 | -1.197590 | 0.003652  |
| C | -1.874202 | 0.000000  | 0.008135  |
| C | -1.166701 | 1.197590  | 0.003652  |
| C | 0.220485  | 1.203210  | -0.006391 |
| C | 0.934756  | 0.000000  | -0.010680 |
| C | 0.220485  | -1.203210 | -0.006391 |
| H | -1.699645 | -2.142008 | 0.009606  |
| H | -2.957443 | 0.000000  | 0.016737  |
| H | -1.699645 | 2.142008  | 0.009606  |
| H | 0.764064  | 2.142202  | -0.009673 |
| H | 0.764064  | -2.142202 | -0.009673 |
| N | 2.324886  | 0.000000  | -0.072997 |
| H | 2.772836  | 0.838479  | 0.271258  |
| H | 2.772836  | -0.838479 | 0.271258  |

SMD(MeCN)-B3LYP/6-311+G(d,p)

E = -287.701806

Zero-point correction = 0.116366 (Hartree/Particle)

Thermal correction to Energy = 0.122167

Thermal correction to Enthalpy = 0.123111

Thermal correction to Gibbs Free Energy = 0.087219

Sum of electronic and zero-point Energies = -287.585441

Sum of electronic and thermal Energies = -287.579639

Sum of electronic and thermal Enthalpies = -287.578695

Sum of electronic and thermal Free Energies = -287.614588

|   |           |           |           |
|---|-----------|-----------|-----------|
| C | -1.171336 | -1.202605 | 0.003362  |
| C | -1.881926 | 0.000000  | 0.006780  |
| C | -1.171336 | 1.202605  | 0.003362  |
| C | 0.221269  | 1.208515  | -0.004914 |
| C | 0.939996  | 0.000000  | -0.008857 |
| C | 0.221269  | -1.208515 | -0.004914 |
| H | -1.704428 | -2.147743 | 0.009281  |
| H | -2.965858 | 0.000000  | 0.014286  |
| H | -1.704428 | 2.147743  | 0.009281  |
| H | 0.764105  | 2.148680  | -0.006973 |
| H | 0.764105  | -2.148680 | -0.006973 |

|   |          |           |           |
|---|----------|-----------|-----------|
| N | 2.333399 | 0.000000  | -0.075571 |
| H | 2.782553 | 0.838379  | 0.270588  |
| H | 2.782553 | -0.838379 | 0.270588  |

SMD(MeCN)-LC-BLYP/6-311+G(d,p)

E = -286.835044  
 Zero-point correction = 0.119040 (Hartree/Particle)  
 Thermal correction to Energy = 0.124730  
 Thermal correction to Enthalpy = 0.125675  
 Thermal correction to Gibbs Free Energy = 0.089976  
 Sum of electronic and zero-point Energies = -286.716004  
 Sum of electronic and thermal Energies = -286.710313  
 Sum of electronic and thermal Enthalpies = -286.709369  
 Sum of electronic and thermal Free Energies = -286.745068

|   |           |           |           |
|---|-----------|-----------|-----------|
| C | -0.005745 | -1.159444 | -1.189659 |
| C | -0.006370 | -1.862807 | 0.000000  |
| C | -0.005745 | -1.159444 | 1.189659  |
| C | -0.005745 | 0.218900  | 1.195282  |
| C | -0.004968 | 0.927825  | 0.000000  |
| C | -0.005745 | 0.218900  | -1.195282 |
| H | -0.004255 | -1.692580 | -2.133872 |
| H | -0.005931 | -2.945906 | 0.000000  |
| H | -0.004255 | -1.692580 | 2.133872  |
| H | -0.005631 | 0.763386  | 2.133550  |
| H | -0.005631 | 0.763386  | -2.133550 |
| N | -0.046354 | 2.310422  | 0.000000  |
| H | 0.278041  | 2.763878  | 0.843134  |
| H | 0.278041  | 2.763878  | -0.843134 |

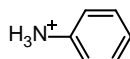

SMD(MeCN)-CAM-B3LYP/6-311+G(d,p)

E = -287.982217  
 Zero-point correction = 0.133014 (Hartree/Particle)  
 Thermal correction to Energy = 0.138869  
 Thermal correction to Enthalpy = 0.139813  
 Thermal correction to Gibbs Free Energy = 0.103526  
 Sum of electronic and zero-point Energies = -287.849203  
 Sum of electronic and thermal Energies = -287.843347  
 Sum of electronic and thermal Enthalpies = -287.842403  
 Sum of electronic and thermal Free Energies = -287.878690

|   |           |           |           |
|---|-----------|-----------|-----------|
| C | 0.004545  | -1.220289 | -1.204521 |
| C | 0.004030  | -1.912728 | 0.000000  |
| C | 0.004545  | -1.220289 | 1.204521  |
| C | 0.004545  | 0.168140  | 1.211287  |
| C | 0.004864  | 0.834403  | 0.000000  |
| C | 0.004545  | 0.168140  | -1.211287 |
| H | 0.007321  | -1.758763 | -2.144166 |
| H | 0.006169  | -2.996105 | 0.000000  |
| H | 0.007321  | -1.758763 | 2.144166  |
| H | 0.007099  | 0.723137  | 2.142273  |
| H | 0.007099  | 0.723137  | -2.142273 |
| N | -0.017668 | 2.302921  | 0.000000  |

|   |           |          |           |
|---|-----------|----------|-----------|
| H | 0.451961  | 2.688083 | 0.826263  |
| H | 0.451961  | 2.688083 | -0.826263 |
| H | -0.977695 | 2.666484 | 0.000000  |

SMD(MeCN)-B3LYP/6-311+G(d,p)

E = -288.149723  
 Zero-point correction = 0.131754 (Hartree/Particle)  
 Thermal correction to Energy = 0.137672  
 Thermal correction to Enthalpy = 0.138617  
 Thermal correction to Gibbs Free Energy = 0.102227  
 Sum of electronic and zero-point Energies = -288.017968  
 Sum of electronic and thermal Energies = -288.012050  
 Sum of electronic and thermal Enthalpies = -288.011106  
 Sum of electronic and thermal Free Energies = -288.047495

|   |           |           |           |
|---|-----------|-----------|-----------|
| C | 0.004579  | -1.225483 | -1.209274 |
| C | 0.004049  | -1.920888 | 0.000000  |
| C | 0.004579  | -1.225483 | 1.209274  |
| C | 0.004579  | 0.168735  | 1.216385  |
| C | 0.005126  | 0.837446  | 0.000000  |
| C | 0.004579  | 0.168735  | -1.216385 |
| H | 0.007563  | -1.763790 | -2.149702 |
| H | 0.006308  | -3.004863 | 0.000000  |
| H | 0.007563  | -1.763790 | 2.149702  |
| H | 0.007067  | 0.723311  | 2.148115  |
| H | 0.007067  | 0.723311  | -2.148115 |
| N | -0.017996 | 2.313180  | 0.000000  |
| H | 0.451874  | 2.698624  | 0.826548  |
| H | 0.451874  | 2.698624  | -0.826548 |
| H | -0.978285 | 2.677939  | 0.000000  |

SMD(MeCN)-LC-BLYP/6-311+G(d,p)

E = -287.277928  
 Zero-point correction = 0.134448 (Hartree/Particle)  
 Thermal correction to Energy = 0.140220  
 Thermal correction to Enthalpy = 0.141164  
 Thermal correction to Gibbs Free Energy = 0.105028  
 Sum of electronic and zero-point Energies = -287.143480  
 Sum of electronic and thermal Energies = -287.137708  
 Sum of electronic and thermal Enthalpies = -287.136763  
 Sum of electronic and thermal Free Energies = -287.172899

|   |           |           |           |
|---|-----------|-----------|-----------|
| C | 1.212607  | -1.196961 | 0.001304  |
| C | 1.900588  | 0.000000  | 0.005292  |
| C | 1.212607  | 1.196961  | 0.001304  |
| C | -0.166817 | 1.203179  | -0.005415 |
| C | -0.830023 | 0.000000  | -0.008600 |
| C | -0.166817 | -1.203179 | -0.005415 |
| H | 1.751598  | -2.136358 | 0.001358  |
| H | 2.983984  | 0.000000  | 0.008677  |
| H | 1.751598  | 2.136358  | 0.001358  |
| H | -0.722239 | 2.134171  | -0.010792 |
| H | -0.722239 | -2.134171 | -0.010792 |
| N | -2.287975 | 0.000000  | 0.006260  |
| H | -2.672124 | 0.827462  | -0.465320 |



|   |           |           |           |
|---|-----------|-----------|-----------|
| H | -2.672124 | -0.827462 | -0.465320 |
| H | -2.655501 | 0.000000  | 0.966202  |

4-bromoaniline

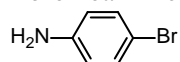

SMD(MeCN)-CAM-B3LYP/6-311+G(d,p)

E = -2861.182199  
 Zero-point correction = 0.107486 (Hartree/Particle)  
 Thermal correction to Energy = 0.114639  
 Thermal correction to Enthalpy = 0.115583  
 Thermal correction to Gibbs Free Energy = 0.075029  
 Sum of electronic and zero-point Energies = -2861.074712  
 Sum of electronic and thermal Energies = -2861.067560  
 Sum of electronic and thermal Enthalpies = -2861.066615  
 Sum of electronic and thermal Free Energies = -2861.107170

|    |           |           |           |
|----|-----------|-----------|-----------|
| C  | 0.003243  | 0.366370  | 1.204072  |
| C  | 0.004020  | -0.320177 | 0.000000  |
| C  | 0.003243  | 0.366370  | -1.204072 |
| C  | 0.003243  | 1.752546  | -1.201606 |
| C  | 0.002595  | 2.468320  | 0.000000  |
| C  | 0.003243  | 1.752546  | 1.201606  |
| H  | 0.001089  | -0.167350 | 2.145896  |
| H  | 0.001089  | -0.167350 | -2.145896 |
| H  | 0.002554  | 2.290240  | -2.143354 |
| H  | 0.002554  | 2.290240  | 2.143354  |
| N  | 0.053912  | 3.855346  | 0.000000  |
| H  | -0.286340 | 4.303801  | -0.839794 |
| H  | -0.286340 | 4.303801  | 0.839794  |
| Br | 0.002014  | -2.233047 | 0.000000  |

SMD(MeCN)-B3LYP/6-311+G(d,p)

E = -2861.246733  
 Zero-point correction = 0.106216 (Hartree/Particle)  
 Thermal correction to Energy = 0.113467  
 Thermal correction to Enthalpy = 0.114411  
 Thermal correction to Gibbs Free Energy = 0.073663  
 Sum of electronic and zero-point Energies = -2861.140517  
 Sum of electronic and thermal Energies = -2861.133267  
 Sum of electronic and thermal Enthalpies = -2861.132322  
 Sum of electronic and thermal Free Energies = -2861.173071

|   |          |           |           |
|---|----------|-----------|-----------|
| C | 0.002907 | 0.371098  | 1.209818  |
| C | 0.003877 | -0.317466 | 0.000000  |
| C | 0.002907 | 0.371098  | -1.209818 |
| C | 0.002907 | 1.762849  | -1.206609 |
| C | 0.002524 | 2.483659  | 0.000000  |
| C | 0.002907 | 1.762849  | 1.206609  |
| H | 0.000217 | -0.162029 | 2.152544  |
| H | 0.000217 | -0.162029 | -2.152544 |
| H | 0.001990 | 2.298688  | -2.150113 |
| H | 0.001990 | 2.298688  | 2.150113  |
| N | 0.060340 | 3.874000  | 0.000000  |

|    |           |           |           |
|----|-----------|-----------|-----------|
| H  | -0.281421 | 4.324057  | -0.839651 |
| H  | -0.281421 | 4.324057  | 0.839651  |
| Br | 0.000797  | -2.246970 | 0.000000  |

SMD(MeCN)-LC-BLYP/6-311+G(d,p)

E = -2859.979201  
 Zero-point correction = 0.108904 (Hartree/Particle)  
 Thermal correction to Energy = 0.115978  
 Thermal correction to Enthalpy = 0.116923  
 Thermal correction to Gibbs Free Energy = 0.076536  
 Sum of electronic and zero-point Energies = -2859.870296  
 Sum of electronic and thermal Energies = -2859.863222  
 Sum of electronic and thermal Enthalpies = -2859.862278  
 Sum of electronic and thermal Free Energies = -2859.902665

|    |           |           |           |
|----|-----------|-----------|-----------|
| C  | 0.003368  | 0.360560  | 1.195008  |
| C  | 0.003904  | -0.325534 | 0.000000  |
| C  | 0.003368  | 0.360560  | -1.195008 |
| C  | 0.003368  | 1.737284  | -1.193968 |
| C  | 0.002838  | 2.448296  | 0.000000  |
| C  | 0.003368  | 1.737284  | 1.193968  |
| H  | 0.001829  | -0.174039 | 2.136809  |
| H  | 0.001829  | -0.174039 | -2.136809 |
| H  | 0.003350  | 2.276243  | -2.134840 |
| H  | 0.003350  | 2.276243  | 2.134840  |
| N  | 0.044095  | 3.826756  | 0.000000  |
| H  | -0.266672 | 4.285784  | -0.845100 |
| H  | -0.266672 | 4.285784  | 0.845100  |
| Br | 0.002658  | -2.213542 | 0.000000  |

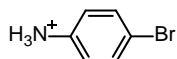

SMD(MeCN)-CAM-B3LYP/6-311+G(d,p)

E = -2861.625614  
 Zero-point correction = 0.122817 (Hartree/Particle)  
 Thermal correction to Energy = 0.130060  
 Thermal correction to Enthalpy = 0.131004  
 Thermal correction to Gibbs Free Energy = 0.090018  
 Sum of electronic and zero-point Energies = -2861.502797  
 Sum of electronic and thermal Energies = -2861.495554  
 Sum of electronic and thermal Enthalpies = -2861.494610  
 Sum of electronic and thermal Free Energies = -2861.535596

|   |           |           |           |
|---|-----------|-----------|-----------|
| C | -0.001111 | 0.308709  | 1.210470  |
| C | -0.000708 | -0.366729 | 0.000000  |
| C | -0.001111 | 0.308709  | -1.210470 |
| C | -0.001111 | 1.695909  | -1.208830 |
| C | -0.001967 | 2.364602  | 0.000000  |
| C | -0.001111 | 1.695909  | 1.208830  |
| H | -0.003633 | -0.228052 | 2.149356  |
| H | -0.003633 | -0.228052 | -2.149356 |
| H | -0.003296 | 2.244735  | -2.143034 |
| H | -0.003296 | 2.244735  | 2.143034  |
| N | 0.019919  | 3.830990  | 0.000000  |
| H | -0.449902 | 4.216251  | -0.826412 |

|    |           |           |          |
|----|-----------|-----------|----------|
| H  | -0.449902 | 4.216251  | 0.826412 |
| H  | 0.980431  | 4.194279  | 0.000000 |
| Br | -0.004671 | -2.271992 | 0.000000 |

SMD(MeCN)-B3LYP/6-311+G(d,p)

E = -2861.691735  
 Zero-point correction = 0.121515 (Hartree/Particle)  
 Thermal correction to Energy = 0.128851  
 Thermal correction to Enthalpy = 0.129795  
 Thermal correction to Gibbs Free Energy = 0.088641  
 Sum of electronic and zero-point Energies = -2861.570221  
 Sum of electronic and thermal Energies = -2861.562884  
 Sum of electronic and thermal Enthalpies = -2861.561940  
 Sum of electronic and thermal Free Energies = -2861.603094

|    |           |           |           |
|----|-----------|-----------|-----------|
| C  | -0.001036 | 0.312676  | 1.216045  |
| C  | -0.000557 | -0.365149 | 0.000000  |
| C  | -0.001036 | 0.312676  | -1.216045 |
| C  | -0.001036 | 1.705570  | -1.213652 |
| C  | -0.002152 | 2.377508  | 0.000000  |
| C  | -0.001036 | 1.705570  | 1.213652  |
| H  | -0.003755 | -0.222927 | 2.156084  |
| H  | -0.003755 | -0.222927 | -2.156084 |
| H  | -0.003070 | 2.253065  | -2.149092 |
| H  | -0.003070 | 2.253065  | 2.149092  |
| N  | 0.020622  | 3.850735  | 0.000000  |
| H  | -0.449365 | 4.236486  | -0.826656 |
| H  | -0.449365 | 4.236486  | 0.826656  |
| H  | 0.981444  | 4.215210  | 0.000000  |
| Br | -0.004923 | -2.285620 | 0.000000  |

SMD(MeCN)-LC-BLYP/6-311+G(d,p)

E = -2860.419178  
 Zero-point correction = 0.124310 (Hartree/Particle)  
 Thermal correction to Energy = 0.131424  
 Thermal correction to Enthalpy = 0.132368  
 Thermal correction to Gibbs Free Energy = 0.091634  
 Sum of electronic and zero-point Energies = -2860.294868  
 Sum of electronic and thermal Energies = -2860.287754  
 Sum of electronic and thermal Enthalpies = -2860.286809  
 Sum of electronic and thermal Free Energies = -2860.327543

|   |           |           |           |
|---|-----------|-----------|-----------|
| C | -0.001426 | 0.303175  | 1.202050  |
| C | -0.001002 | -0.370271 | 0.000000  |
| C | -0.001426 | 0.303175  | -1.202050 |
| C | -0.001426 | 1.681096  | -1.200984 |
| C | -0.001897 | 2.346905  | 0.000000  |
| C | -0.001426 | 1.681096  | 1.200984  |
| H | -0.003831 | -0.234894 | 2.140695  |
| H | -0.003831 | -0.234894 | -2.140695 |
| H | -0.003666 | 2.230803  | -2.135037 |
| H | -0.003666 | 2.230803  | 2.135037  |
| N | 0.019978  | 3.802765  | 0.000000  |
| H | -0.449701 | 4.189744  | -0.827618 |
| H | -0.449701 | 4.189744  | 0.827618  |

|    |           |           |          |
|----|-----------|-----------|----------|
| H  | 0.982292  | 4.165280  | 0.000000 |
| Br | -0.004461 | -2.252200 | 0.000000 |

2,4-difluoroaniline

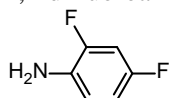

SMD(MeCN)-CAM-B3LYP/6-311+G(d,p)

E = -486.036059

Zero-point correction = 0.101108 (Hartree/Particle)

Thermal correction to Energy = 0.108476

Thermal correction to Enthalpy = 0.109420

Thermal correction to Gibbs Free Energy = 0.069452

Sum of electronic and zero-point Energies = -485.934951

Sum of electronic and thermal Energies = -485.927584

Sum of electronic and thermal Enthalpies = -485.926639

Sum of electronic and thermal Free Energies = -485.966607

|   |           |           |           |
|---|-----------|-----------|-----------|
| C | 1.176522  | 1.280330  | -0.000671 |
| C | 1.582319  | -0.036238 | 0.002036  |
| C | 0.687086  | -1.085952 | 0.001597  |
| C | -0.651514 | -0.763707 | -0.004763 |
| C | -1.137757 | 0.540566  | -0.008067 |
| C | -0.183388 | 1.559536  | -0.005271 |
| H | 1.909982  | 2.076624  | 0.002579  |
| H | 1.012675  | -2.118065 | 0.006932  |
| H | -0.520079 | 2.589741  | -0.007008 |
| N | -2.502272 | 0.792470  | -0.072825 |
| H | -3.094340 | 0.061903  | 0.299060  |
| H | -2.776154 | 1.706793  | 0.261414  |
| F | -1.564432 | -1.771806 | -0.003712 |
| F | 2.913788  | -0.320583 | 0.007894  |

SMD(MeCN)-B3LYP/6-311+G(d,p)

E = -486.235061

Zero-point correction = 0.099890 (Hartree/Particle)

Thermal correction to Energy = 0.107350

Thermal correction to Enthalpy = 0.108295

Thermal correction to Gibbs Free Energy = 0.068156

Sum of electronic and zero-point Energies = -486.135171

Sum of electronic and thermal Energies = -486.127710

Sum of electronic and thermal Enthalpies = -486.126766

Sum of electronic and thermal Free Energies = -486.166904

|   |           |           |           |
|---|-----------|-----------|-----------|
| C | -1.180634 | -1.286620 | -0.000552 |
| C | -1.589254 | 0.035404  | 0.001667  |
| C | -0.689514 | 1.089423  | 0.001632  |
| C | 0.655227  | 0.767896  | -0.003874 |
| C | 1.144933  | -0.542864 | -0.006360 |
| C | 0.184756  | -1.566156 | -0.003859 |
| H | -1.912718 | -2.084917 | 0.002762  |
| H | -1.015629 | 2.121860  | 0.006890  |
| H | 0.520774  | -2.597169 | -0.004615 |
| N | 2.511825  | -0.798392 | -0.075276 |

|   |           |           |           |
|---|-----------|-----------|-----------|
| H | 3.107376  | -0.070109 | 0.298006  |
| H | 2.784558  | -1.714195 | 0.258804  |
| F | 1.569561  | 1.783974  | -0.003198 |
| F | -2.927363 | 0.321668  | 0.006882  |

SMD(MeCN)-LC-BLYP/6-311+G(d,p)

E = -485.099421

Zero-point correction = 0.102527 (Hartree/Particle)

Thermal correction to Energy = 0.109796

Thermal correction to Enthalpy = 0.110740

Thermal correction to Gibbs Free Energy = 0.070962

Sum of electronic and zero-point Energies = -484.996895

Sum of electronic and thermal Energies = -484.989625

Sum of electronic and thermal Enthalpies = -484.988681

Sum of electronic and thermal Free Energies = -485.028459

|   |           |           |           |
|---|-----------|-----------|-----------|
| C | 1.170023  | 1.271065  | -0.000902 |
| C | 1.573346  | -0.037199 | 0.002406  |
| C | 0.682426  | -1.079210 | 0.001581  |
| C | -0.647098 | -0.758407 | -0.005310 |
| C | -1.128183 | 0.538131  | -0.009825 |
| C | -0.181043 | 1.550046  | -0.006706 |
| H | 1.905937  | 2.065357  | 0.002305  |
| H | 1.007508  | -2.111818 | 0.006823  |
| H | -0.518158 | 2.580111  | -0.009534 |
| N | -2.485902 | 0.784989  | -0.065195 |
| H | -3.084527 | 0.047717  | 0.281793  |
| H | -2.770840 | 1.703118  | 0.248210  |
| F | -1.557958 | -1.756197 | -0.004369 |
| F | 2.896244  | -0.320019 | 0.008737  |

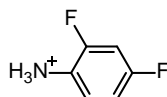

SMD(MeCN)-CAM-B3LYP/6-311+G(d,p)

E = -486.476773

Zero-point correction = 0.116352 (Hartree/Particle)

Thermal correction to Energy = 0.123760

Thermal correction to Enthalpy = 0.124704

Thermal correction to Gibbs Free Energy = 0.084486

Sum of electronic and zero-point Energies = -486.360421

Sum of electronic and thermal Energies = -486.353013

Sum of electronic and thermal Enthalpies = -486.352069

Sum of electronic and thermal Free Energies = -486.392287

|   |           |           |           |
|---|-----------|-----------|-----------|
| C | -1.201303 | -1.294640 | -0.000028 |
| C | -1.618316 | 0.020315  | -0.000010 |
| C | -0.750814 | 1.095341  | 0.000012  |
| C | 0.593472  | 0.802755  | 0.000008  |
| C | 1.056967  | -0.500444 | -0.000008 |
| C | 0.161270  | -1.552213 | -0.000023 |
| H | -1.926348 | -2.097448 | -0.000048 |
| H | -1.103308 | 2.118154  | 0.000033  |
| H | 0.527757  | -2.571723 | -0.000044 |

|   |           |           |           |
|---|-----------|-----------|-----------|
| N | 2.495971  | -0.738572 | 0.000012  |
| H | 2.952736  | -0.334836 | 0.827331  |
| H | 2.699867  | -1.743858 | -0.000220 |
| H | 2.952819  | -0.334456 | -0.827074 |
| F | 1.494315  | 1.800680  | 0.000022  |
| F | -2.941312 | 0.277929  | 0.000003  |

SMD(MeCN)-B3LYP/6-311+G(d,p)

E = -486.677318

Zero-point correction = 0.115129 (Hartree/Particle)

Thermal correction to Energy = 0.122624

Thermal correction to Enthalpy = 0.123569

Thermal correction to Gibbs Free Energy = 0.083191

Sum of electronic and zero-point Energies = -486.562190

Sum of electronic and thermal Energies = -486.554694

Sum of electronic and thermal Enthalpies = -486.553750

Sum of electronic and thermal Free Energies = -486.594127

|   |           |           |           |
|---|-----------|-----------|-----------|
| C | 1.205052  | -1.300991 | 0.000025  |
| C | 1.625712  | 0.019025  | 0.000043  |
| C | 0.754215  | 1.098385  | 0.000007  |
| C | -0.596562 | 0.807270  | 0.000020  |
| C | -1.062554 | -0.501645 | 0.000009  |
| C | -0.163214 | -1.558038 | -0.000027 |
| H | 1.927987  | -2.106316 | 0.000027  |
| H | 1.107300  | 2.121424  | -0.000021 |
| H | -0.529796 | -2.577918 | -0.000033 |
| N | -2.507588 | -0.743885 | -0.000004 |
| H | -2.966327 | -0.341471 | -0.827557 |
| H | -2.709264 | -1.749949 | 0.000345  |
| H | -2.966461 | -0.340842 | 0.827172  |
| F | -1.497770 | 1.813300  | -0.000009 |
| F | 2.954857  | 0.277614  | -0.000032 |

SMD(MeCN)-LC-BLYP/6-311+G(d,p)

E = -485.536671

Zero-point correction = 0.117719 (Hartree/Particle)

Thermal correction to Energy = 0.125023

Thermal correction to Enthalpy = 0.125968

Thermal correction to Gibbs Free Energy = 0.085938

Sum of electronic and zero-point Energies = -485.418952

Sum of electronic and thermal Energies = -485.411648

Sum of electronic and thermal Enthalpies = -485.410704

Sum of electronic and thermal Free Energies = -485.450734

|   |           |           |           |
|---|-----------|-----------|-----------|
| C | -1.195478 | -1.285223 | -0.000037 |
| C | -1.608202 | 0.021966  | -0.000008 |
| C | -0.745207 | 1.089674  | 0.000019  |
| C | 0.589368  | 0.796206  | 0.000016  |
| C | 1.049418  | -0.499434 | -0.000008 |
| C | 0.158161  | -1.543237 | -0.000033 |
| H | -1.923982 | -2.085283 | -0.000063 |
| H | -1.096963 | 2.113107  | 0.000043  |
| H | 0.523979  | -2.563424 | -0.000059 |
| N | 2.478734  | -0.731717 | 0.000007  |

|   |           |           |           |
|---|-----------|-----------|-----------|
| H | 2.934990  | -0.325348 | 0.828327  |
| H | 2.688085  | -1.737657 | -0.000166 |
| H | 2.935052  | -0.325065 | -0.828140 |
| F | 1.490011  | 1.783958  | 0.000042  |
| F | -2.923418 | 0.278928  | -0.000007 |

2-chloroaniline

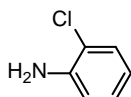

SMD(MeCN)-CAM-B3LYP/6-311+G(d,p)

E = -747.163010

Zero-point correction = 0.108388 (Hartree/Particle)

Thermal correction to Energy = 0.115200

Thermal correction to Enthalpy = 0.116144

Thermal correction to Gibbs Free Energy = 0.077195

Sum of electronic and zero-point Energies = -747.054622

Sum of electronic and thermal Energies = -747.047810

Sum of electronic and thermal Enthalpies = -747.046866

Sum of electronic and thermal Free Energies = -747.085815

|    |           |           |           |
|----|-----------|-----------|-----------|
| C  | 2.347708  | -0.005772 | 0.000211  |
| C  | 1.825877  | -1.295897 | 0.006356  |
| C  | 0.450064  | -1.466844 | 0.007217  |
| C  | -0.382754 | -0.359758 | -0.000338 |
| C  | 0.114604  | 0.947361  | -0.006055 |
| C  | 1.508849  | 1.093883  | -0.004699 |
| H  | 3.420710  | 0.146339  | 0.001656  |
| H  | 2.478883  | -2.159454 | 0.011528  |
| H  | 0.015933  | -2.458806 | 0.013501  |
| H  | 1.919745  | 2.097606  | -0.007852 |
| N  | -0.711334 | 2.054422  | -0.068633 |
| H  | -1.649403 | 1.943507  | 0.289701  |
| H  | -0.283877 | 2.924325  | 0.218104  |
| Cl | -2.124043 | -0.608960 | -0.003668 |

SMD(MeCN)-B3LYP/6-311+G(d,p)

E = -747.325278

Zero-point correction = 0.107098 (Hartree/Particle)

Thermal correction to Energy = 0.114009

Thermal correction to Enthalpy = 0.114953

Thermal correction to Gibbs Free Energy = 0.075814

Sum of electronic and zero-point Energies = -747.218180

Sum of electronic and thermal Energies = -747.211269

Sum of electronic and thermal Enthalpies = -747.210325

Sum of electronic and thermal Free Energies = -747.249464

|   |           |           |           |
|---|-----------|-----------|-----------|
| C | 2.358817  | -0.011309 | 0.001116  |
| C | 1.831430  | -1.304929 | 0.004959  |
| C | 0.448753  | -1.473693 | 0.005478  |
| C | -0.383392 | -0.359947 | -0.000741 |
| C | 0.118054  | 0.953449  | -0.005159 |
| C | 1.519512  | 1.095130  | -0.002517 |
| H | 3.432840  | 0.138259  | 0.003801  |

|    |           |           |           |
|----|-----------|-----------|-----------|
| H  | 2.481978  | -2.171198 | 0.009091  |
| H  | 0.013059  | -2.465470 | 0.010917  |
| H  | 1.933983  | 2.098079  | -0.003551 |
| N  | -0.706206 | 2.065768  | -0.072442 |
| H  | -1.645999 | 1.956150  | 0.284783  |
| H  | -0.278163 | 2.933908  | 0.222260  |
| Cl | -2.138430 | -0.608371 | -0.002295 |

SMD(MeCN)-LC-BLYP/6-311+G(d,p)

E = -746.199571

Zero-point correction = 0.109863 (Hartree/Particle)

Thermal correction to Energy = 0.116589

Thermal correction to Enthalpy = 0.117533

Thermal correction to Gibbs Free Energy = 0.078759

Sum of electronic and zero-point Energies = -746.089707

Sum of electronic and thermal Energies = -746.082982

Sum of electronic and thermal Enthalpies = -746.082038

Sum of electronic and thermal Free Energies = -746.120811

|    |           |           |           |
|----|-----------|-----------|-----------|
| C  | 2.331047  | 0.000972  | -0.000458 |
| C  | 1.817049  | -1.283472 | 0.007277  |
| C  | 0.451295  | -1.455954 | 0.008329  |
| C  | -0.382201 | -0.359432 | 0.000047  |
| C  | 0.110023  | 0.939224  | -0.007106 |
| C  | 1.494384  | 1.090679  | -0.006433 |
| H  | 3.403558  | 0.156309  | 0.000038  |
| H  | 2.473384  | -2.144267 | 0.013092  |
| H  | 0.019409  | -2.449157 | 0.015083  |
| H  | 1.901336  | 2.095804  | -0.011367 |
| N  | -0.715097 | 2.037137  | -0.058992 |
| H  | -1.663729 | 1.929196  | 0.270594  |
| H  | -0.292844 | 2.919311  | 0.195397  |
| Cl | -2.103825 | -0.609368 | -0.004696 |

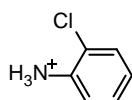

SMD(MeCN)-CAM-B3LYP/6-311+G(d,p)

E = -747.602424

Zero-point correction = 0.123187 (Hartree/Particle)

Thermal correction to Energy = 0.130257

Thermal correction to Enthalpy = 0.131201

Thermal correction to Gibbs Free Energy = 0.091367

Sum of electronic and zero-point Energies = -747.479237

Sum of electronic and thermal Energies = -747.472168

Sum of electronic and thermal Enthalpies = -747.471224

Sum of electronic and thermal Free Energies = -747.511057

|   |           |           |           |
|---|-----------|-----------|-----------|
| C | -2.369210 | 0.040433  | 0.004090  |
| C | -1.877832 | -1.256979 | -0.002064 |
| C | -0.510008 | -1.491791 | -0.004443 |
| C | 0.365616  | -0.419530 | -0.001695 |
| C | -0.128322 | 0.877598  | -0.001703 |
| C | -1.490402 | 1.112906  | 0.003417  |



|    |           |           |           |
|----|-----------|-----------|-----------|
| H  | -3.435977 | 0.223522  | 0.007801  |
| H  | -2.559824 | -2.098101 | -0.004903 |
| H  | -0.121242 | -2.501581 | -0.008609 |
| H  | -1.855059 | 2.133104  | 0.006723  |
| N  | 0.786951  | 2.018233  | -0.003808 |
| H  | 1.468368  | 1.973602  | -0.770674 |
| H  | 0.266403  | 2.895310  | -0.118500 |
| H  | 1.314653  | 2.098736  | 0.874113  |
| Cl | 2.086763  | -0.707532 | 0.003241  |

SMD(MeCN)-B3LYP/6-311+G(d,p)

E = -747.766337

Zero-point correction = 0.122144 (Hartree/Particle)

Thermal correction to Energy = 0.129178

Thermal correction to Enthalpy = 0.130123

Thermal correction to Gibbs Free Energy = 0.090528

Sum of electronic and zero-point Energies = -747.644193

Sum of electronic and thermal Energies = -747.637158

Sum of electronic and thermal Enthalpies = -747.636214

Sum of electronic and thermal Free Energies = -747.675809

|    |           |           |           |
|----|-----------|-----------|-----------|
| C  | -2.379762 | 0.032505  | 0.002531  |
| C  | -1.881515 | -1.268225 | -0.000419 |
| C  | -0.507310 | -1.499300 | -0.002207 |
| C  | 0.368282  | -0.419264 | -0.001022 |
| C  | -0.132339 | 0.881927  | -0.002245 |
| C  | -1.501372 | 1.112341  | 0.000764  |
| H  | -3.447648 | 0.212282  | 0.004515  |
| H  | -2.560295 | -2.112714 | -0.001620 |
| H  | -0.115766 | -2.508448 | -0.004484 |
| H  | -1.870233 | 2.131578  | 0.001378  |
| N  | 0.779269  | 2.034032  | -0.000986 |
| H  | 1.474390  | 1.987629  | -0.755766 |
| H  | 0.253657  | 2.905924  | -0.133021 |
| H  | 1.291979  | 2.127835  | 0.885171  |
| Cl | 2.101361  | -0.707189 | 0.001548  |

SMD(MeCN)-LC-BLYP/6-311+G(d,p)

E = -746.635447

Zero-point correction = 0.124324 (Hartree/Particle)

Thermal correction to Energy = 0.131415

Thermal correction to Enthalpy = 0.132359

Thermal correction to Gibbs Free Energy = 0.092203

Sum of electronic and zero-point Energies = -746.511124

Sum of electronic and thermal Energies = -746.504032

Sum of electronic and thermal Enthalpies = -746.503088

Sum of electronic and thermal Free Energies = -746.543245

|   |           |           |           |
|---|-----------|-----------|-----------|
| C | -2.353238 | 0.057337  | -0.000140 |
| C | -1.875566 | -1.235664 | -0.000058 |
| C | -0.518125 | -1.479326 | 0.000204  |
| C | 0.359085  | -0.420755 | 0.000128  |
| C | -0.121097 | 0.872130  | 0.000062  |
| C | -1.471902 | 1.117107  | 0.000094  |
| H | -3.418832 | 0.247892  | -0.000610 |

|    |           |           |           |
|----|-----------|-----------|-----------|
| H  | -2.564759 | -2.071003 | -0.000223 |
| H  | -0.135827 | -2.491915 | 0.000513  |
| H  | -1.830765 | 2.139269  | 0.000403  |
| N  | 0.806393  | 1.989429  | 0.000004  |
| H  | 1.422728  | 1.984839  | -0.823770 |
| H  | 0.301512  | 2.885297  | -0.009728 |
| H  | 1.410078  | 1.995763  | 0.833198  |
| Cl | 2.062128  | -0.710654 | -0.000091 |

2,5-dichloroaniline

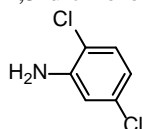

SMD(MeCN)-CAM-B3LYP/6-311+G(d,p)

E = -1206.789791  
 Zero-point correction = 0.098586 (Hartree/Particle)  
 Thermal correction to Energy = 0.106656  
 Thermal correction to Enthalpy = 0.107600  
 Thermal correction to Gibbs Free Energy = 0.065176  
 Sum of electronic and zero-point Energies = -1206.691205  
 Sum of electronic and thermal Energies = -1206.683135  
 Sum of electronic and thermal Enthalpies = -1206.682191  
 Sum of electronic and thermal Free Energies = -1206.724615

|    |           |           |           |
|----|-----------|-----------|-----------|
| C  | 1.522504  | -0.120205 | -0.000867 |
| C  | 0.967681  | -1.390561 | 0.003191  |
| C  | -0.414900 | -1.492718 | 0.004854  |
| C  | -1.202048 | -0.355396 | -0.000263 |
| C  | -0.646905 | 0.930428  | -0.005755 |
| C  | 0.751494  | 1.023548  | -0.003712 |
| H  | 1.588561  | -2.275714 | 0.005852  |
| H  | -0.884039 | -2.468248 | 0.009733  |
| H  | 1.212354  | 2.003372  | -0.004890 |
| N  | -1.418631 | 2.068470  | -0.066572 |
| H  | -2.370167 | 2.003230  | 0.265237  |
| H  | -0.958222 | 2.927026  | 0.201505  |
| Cl | -2.948114 | -0.529097 | -0.001393 |
| Cl | 3.270171  | 0.044419  | 0.001620  |

SMD(MeCN)-B3LYP/6-311+G(d,p)

E = -1206.948613  
 Zero-point correction = 0.097331 (Hartree/Particle)  
 Thermal correction to Energy = 0.105512  
 Thermal correction to Enthalpy = 0.106456  
 Thermal correction to Gibbs Free Energy = 0.063818  
 Sum of electronic and zero-point Energies = -1206.851282  
 Sum of electronic and thermal Energies = -1206.843101  
 Sum of electronic and thermal Enthalpies = -1206.842157  
 Sum of electronic and thermal Free Energies = -1206.884794

|   |           |           |           |
|---|-----------|-----------|-----------|
| C | 1.527887  | -0.121403 | -0.001245 |
| C | 0.970822  | -1.396743 | 0.000813  |
| C | -0.418295 | -1.498173 | 0.002835  |

|    |           |           |           |
|----|-----------|-----------|-----------|
| C  | -1.207051 | -0.355849 | -0.000721 |
| C  | -0.649754 | 0.936998  | -0.005278 |
| C  | 0.755745  | 1.028218  | -0.002177 |
| H  | 1.589794  | -2.283766 | 0.002048  |
| H  | -0.886563 | -2.474630 | 0.007051  |
| H  | 1.216904  | 2.008371  | -0.001009 |
| N  | -1.421405 | 2.078829  | -0.070322 |
| H  | -2.373661 | 2.014044  | 0.262669  |
| H  | -0.961028 | 2.937075  | 0.202341  |
| Cl | -2.965791 | -0.531526 | 0.000532  |
| Cl | 3.288630  | 0.042633  | 0.002632  |

SMD(MeCN)-LC-BLYP/6-311+G(d,p)

E = -1205.563480

Zero-point correction = 0.100111 (Hartree/Particle)

Thermal correction to Energy = 0.108056

Thermal correction to Enthalpy = 0.109000

Thermal correction to Gibbs Free Energy = 0.066831

Sum of electronic and zero-point Energies = -1205.463369

Sum of electronic and thermal Energies = -1205.455424

Sum of electronic and thermal Enthalpies = -1205.454480

Sum of electronic and thermal Free Energies = -1205.496649

|    |           |           |           |
|----|-----------|-----------|-----------|
| C  | 1.514556  | -0.118301 | -0.000589 |
| C  | 0.962743  | -1.381363 | 0.004799  |
| C  | -0.409840 | -1.483448 | 0.006163  |
| C  | -1.195159 | -0.354677 | 0.000275  |
| C  | -0.643057 | 0.921917  | -0.006388 |
| C  | 0.745793  | 1.016105  | -0.004802 |
| H  | 1.585743  | -2.265245 | 0.008271  |
| H  | -0.879801 | -2.458926 | 0.011249  |
| H  | 1.205986  | 1.996486  | -0.007544 |
| N  | -1.411721 | 2.052338  | -0.055551 |
| H  | -2.374828 | 1.993157  | 0.241559  |
| H  | -0.954220 | 2.923179  | 0.174714  |
| Cl | -2.923003 | -0.526123 | -0.002920 |
| Cl | 3.243530  | 0.046334  | 0.000794  |

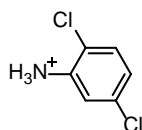

SMD(MeCN)-CAM-B3LYP/6-311+G(d,p)

E = -1207.225276

Zero-point correction = 0.113658 (Hartree/Particle)

Thermal correction to Energy = 0.121921

Thermal correction to Enthalpy = 0.122866

Thermal correction to Gibbs Free Energy = 0.079583

Sum of electronic and zero-point Energies = -1207.111617

Sum of electronic and thermal Energies = -1207.103354

Sum of electronic and thermal Enthalpies = -1207.102410

Sum of electronic and thermal Free Energies = -1207.145693

|   |           |           |          |
|---|-----------|-----------|----------|
| C | -1.556158 | -0.121960 | 0.000000 |
|---|-----------|-----------|----------|

|    |           |           |           |
|----|-----------|-----------|-----------|
| C  | -1.003175 | -1.391305 | 0.002400  |
| C  | 0.375365  | -1.534315 | 0.002014  |
| C  | 1.186811  | -0.413027 | 0.000229  |
| C  | 0.612642  | 0.850134  | -0.001372 |
| C  | -0.759263 | 1.009952  | -0.002093 |
| H  | -1.636720 | -2.268366 | 0.004066  |
| H  | 0.817444  | -2.521666 | 0.003125  |
| H  | -1.188818 | 2.003870  | -0.004317 |
| N  | 1.455582  | 2.041798  | 0.002816  |
| H  | 2.107693  | 2.063418  | -0.790296 |
| H  | 0.884299  | 2.892601  | -0.059686 |
| H  | 2.012236  | 2.122080  | 0.862842  |
| Cl | 2.919357  | -0.591500 | -0.001739 |
| Cl | -3.291271 | 0.063182  | -0.000762 |

SMD(MeCN)-B3LYP/6-311+G(d,p)

E = -1207.385693

Zero-point correction = 0.112491 (Hartree/Particle)

Thermal correction to Energy = 0.120799

Thermal correction to Enthalpy = 0.121743

Thermal correction to Gibbs Free Energy = 0.078508

Sum of electronic and zero-point Energies = -1207.273202

Sum of electronic and thermal Energies = -1207.264895

Sum of electronic and thermal Enthalpies = -1207.263950

Sum of electronic and thermal Free Energies = -1207.307185

|    |           |           |           |
|----|-----------|-----------|-----------|
| C  | -1.561883 | -0.123471 | 0.000522  |
| C  | -1.005975 | -1.397939 | 0.005596  |
| C  | 0.378343  | -1.539817 | 0.005237  |
| C  | 1.192639  | -0.413105 | 0.001356  |
| C  | 0.614974  | 0.855194  | -0.000782 |
| C  | -0.763182 | 1.014301  | -0.002434 |
| H  | -1.637629 | -2.276827 | 0.008712  |
| H  | 0.820252  | -2.527700 | 0.007703  |
| H  | -1.192940 | 2.008404  | -0.006421 |
| N  | 1.457681  | 2.055245  | 0.005401  |
| H  | 2.121330  | 2.073326  | -0.778727 |
| H  | 0.883521  | 2.903150  | -0.072294 |
| H  | 2.002439  | 2.145201  | 0.872809  |
| Cl | 2.935765  | -0.595331 | -0.004679 |
| Cl | -3.308132 | 0.061023  | -0.002766 |

SMD(MeCN)-LC-BLYP/6-311+G(d,p)

E = -1205.995438

Zero-point correction = 0.115072 (Hartree/Particle)

Thermal correction to Energy = 0.123196

Thermal correction to Enthalpy = 0.124141

Thermal correction to Gibbs Free Energy = 0.081127

Sum of electronic and zero-point Energies = -1205.880366

Sum of electronic and thermal Energies = -1205.872242

Sum of electronic and thermal Enthalpies = -1205.871298

Sum of electronic and thermal Free Energies = -1205.914312

|   |           |           |          |
|---|-----------|-----------|----------|
| C | -1.548145 | -0.119794 | 0.000039 |
| C | -0.999051 | -1.381178 | 0.000057 |

|    |           |           |           |
|----|-----------|-----------|-----------|
| C  | 0.370507  | -1.525629 | 0.000076  |
| C  | 1.178259  | -0.412976 | 0.000044  |
| C  | 0.609135  | 0.842907  | 0.000069  |
| C  | -0.753289 | 1.002987  | 0.000055  |
| H  | -1.635193 | -2.256834 | 0.000063  |
| H  | 0.812453  | -2.513423 | 0.000094  |
| H  | -1.182833 | 1.997467  | 0.000059  |
| N  | 1.453009  | 2.021503  | 0.000020  |
| H  | 2.059403  | 2.067107  | -0.829909 |
| H  | 0.886718  | 2.879987  | 0.001037  |
| H  | 2.060983  | 2.066126  | 0.828834  |
| Cl | 2.894956  | -0.586026 | -0.000072 |
| Cl | -3.266550 | 0.066682  | -0.000066 |

2,6-dichloroaniline

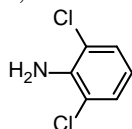

SMD(MeCN)-CAM-B3LYP/6-311+G(d,p)

E = -1206.787930

Zero-point correction = 0.099057 (Hartree/Particle)

Thermal correction to Energy = 0.107015

Thermal correction to Enthalpy = 0.107959

Thermal correction to Gibbs Free Energy = 0.065841

Sum of electronic and zero-point Energies = -1206.688873

Sum of electronic and thermal Energies = -1206.680915

Sum of electronic and thermal Enthalpies = -1206.679971

Sum of electronic and thermal Free Energies = -1206.722090

|    |           |           |           |
|----|-----------|-----------|-----------|
| C  | -1.197830 | 1.598030  | 0.004812  |
| C  | 0.000002  | 2.297177  | 0.007189  |
| C  | 1.197833  | 1.598026  | 0.004753  |
| C  | 1.185906  | 0.216144  | 0.001502  |
| C  | -0.000002 | -0.533717 | 0.001201  |
| C  | -1.185906 | 0.216147  | 0.001553  |
| H  | -2.144304 | 2.123188  | 0.005876  |
| H  | 0.000005  | 3.379371  | 0.009918  |
| H  | 2.144307  | 2.123184  | 0.005774  |
| N  | -0.000016 | -1.906335 | -0.054166 |
| H  | 0.843495  | -2.374134 | 0.244641  |
| H  | -0.843431 | -2.374136 | 0.244909  |
| Cl | 2.715577  | -0.643647 | -0.007652 |
| Cl | -2.715576 | -0.643645 | -0.007526 |

SMD(MeCN)-B3LYP/6-311+G(d,p)

E = -1206.946518

Zero-point correction = 0.097696 (Hartree/Particle)

Thermal correction to Energy = 0.105792

Thermal correction to Enthalpy = 0.106736

Thermal correction to Gibbs Free Energy = 0.064344

Sum of electronic and zero-point Energies = -1206.848821

Sum of electronic and thermal Energies = -1206.840726

Sum of electronic and thermal Enthalpies = -1206.839782  
 Sum of electronic and thermal Free Energies = -1206.882174

|    |           |           |           |
|----|-----------|-----------|-----------|
| C  | -1.203572 | 1.605180  | 0.004779  |
| C  | -0.000019 | 2.306250  | 0.007087  |
| C  | 1.203560  | 1.605144  | 0.004760  |
| C  | 1.190575  | 0.218016  | 0.001755  |
| C  | -0.000006 | -0.538093 | 0.001718  |
| C  | -1.190519 | 0.218033  | 0.001702  |
| H  | -2.149891 | 2.131445  | 0.006084  |
| H  | 0.000105  | 3.389126  | 0.009771  |
| H  | 2.149836  | 2.131485  | 0.006069  |
| N  | -0.000012 | -1.913933 | -0.057275 |
| H  | 0.843732  | -2.380736 | 0.245908  |
| H  | -0.843341 | -2.380789 | 0.246984  |
| Cl | 2.732388  | -0.646468 | -0.007191 |
| Cl | -2.732416 | -0.646484 | -0.007204 |

SMD(MeCN)-LC-BLYP/6-311+G(d,p)

E = -1205.561920  
 Zero-point correction = 0.100561 (Hartree/Particle)  
 Thermal correction to Energy = 0.108417  
 Thermal correction to Enthalpy = 0.109361  
 Thermal correction to Gibbs Free Energy = 0.067453  
 Sum of electronic and zero-point Energies = -1205.461360  
 Sum of electronic and thermal Energies = -1205.453503  
 Sum of electronic and thermal Enthalpies = -1205.452559  
 Sum of electronic and thermal Free Energies = -1205.494467

|    |           |           |           |
|----|-----------|-----------|-----------|
| C  | -1.188988 | 1.586947  | 0.005069  |
| C  | 0.000003  | 2.283254  | 0.007650  |
| C  | 1.188991  | 1.586946  | 0.005069  |
| C  | 1.179409  | 0.213618  | 0.001434  |
| C  | 0.000000  | -0.528671 | 0.000110  |
| C  | -1.179409 | 0.213621  | 0.001437  |
| H  | -2.136120 | 2.111563  | 0.006027  |
| H  | 0.000002  | 3.365302  | 0.010623  |
| H  | 2.136125  | 2.111559  | 0.006027  |
| N  | -0.000002 | -1.893116 | -0.043835 |
| H  | 0.848776  | -2.374696 | 0.214584  |
| H  | -0.848806 | -2.374690 | 0.214508  |
| Cl | 2.692176  | -0.638870 | -0.007928 |
| Cl | -2.692176 | -0.638866 | -0.007927 |

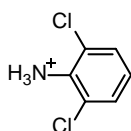

SMD(MeCN)-CAM-B3LYP/6-311+G(d,p)

E = -1207.218880  
 Zero-point correction = 0.114047 (Hartree/Particle)  
 Thermal correction to Energy = 0.122076  
 Thermal correction to Enthalpy = 0.123020  
 Thermal correction to Gibbs Free Energy = 0.080576

Sum of electronic and zero-point Energies = -1207.104833  
Sum of electronic and thermal Energies = -1207.096804  
Sum of electronic and thermal Enthalpies = -1207.095860  
Sum of electronic and thermal Free Energies = -1207.138304

|    |           |           |           |
|----|-----------|-----------|-----------|
| C  | 1.211292  | 1.620980  | -0.000021 |
| C  | 0.010514  | 2.310926  | 0.000009  |
| C  | -1.197952 | 1.632308  | 0.000030  |
| C  | -1.197630 | 0.249479  | 0.000014  |
| C  | -0.001994 | -0.460453 | 0.000021  |
| C  | 1.199688  | 0.237267  | 0.000002  |
| H  | 2.154788  | 2.149873  | -0.000060 |
| H  | 0.016433  | 3.393433  | 0.000003  |
| H  | -2.136340 | 2.170291  | 0.000046  |
| N  | -0.022350 | -1.917365 | 0.000024  |
| H  | -0.495612 | -2.299278 | -0.829480 |
| H  | 0.925595  | -2.313199 | 0.000004  |
| H  | -0.495557 | -2.299279 | 0.829566  |
| Cl | -2.713509 | -0.609134 | -0.000025 |
| Cl | 2.716076  | -0.621650 | -0.000010 |

SMD(MeCN)-B3LYP/6-311+G(d,p)

E = -1207.379288

Zero-point correction = 0.112672 (Hartree/Particle)

Thermal correction to Energy = 0.120835

Thermal correction to Enthalpy = 0.121779

Thermal correction to Gibbs Free Energy = 0.079036

Sum of electronic and zero-point Energies = -1207.266616

Sum of electronic and thermal Energies = -1207.258453

Sum of electronic and thermal Enthalpies = -1207.257508

Sum of electronic and thermal Free Energies = -1207.300252

|    |           |           |           |
|----|-----------|-----------|-----------|
| C  | 1.216600  | 1.628502  | -0.000031 |
| C  | 0.010203  | 2.320185  | 0.000007  |
| C  | -1.203602 | 1.639500  | 0.000029  |
| C  | -1.202912 | 0.250776  | 0.000009  |
| C  | -0.002109 | -0.462978 | 0.000005  |
| C  | 1.204545  | 0.239122  | -0.000032 |
| H  | 2.159948  | 2.158389  | -0.000068 |
| H  | 0.016012  | 3.403309  | 0.000024  |
| H  | -2.141845 | 2.178451  | 0.000073  |
| N  | -0.021082 | -1.926104 | 0.000007  |
| H  | -0.493993 | -2.308957 | -0.829728 |
| H  | 0.928575  | -2.319213 | 0.000130  |
| H  | -0.494203 | -2.308960 | 0.829613  |
| Cl | -2.729446 | -0.612001 | -0.000012 |
| Cl | 2.731607  | -0.623936 | 0.000011  |

SMD(MeCN)-LC-BLYP/6-311+G(d,p)

E = -1205.989072

Zero-point correction = 0.115549 (Hartree/Particle)

Thermal correction to Energy = 0.123439

Thermal correction to Enthalpy = 0.124383

Thermal correction to Gibbs Free Energy = 0.082205

Sum of electronic and zero-point Energies = -1205.873523

Sum of electronic and thermal Energies = -1205.865633  
 Sum of electronic and thermal Enthalpies = -1205.864689  
 Sum of electronic and thermal Free Energies = -1205.906867

|    |           |           |           |
|----|-----------|-----------|-----------|
| C  | 1.203341  | 1.609311  | 0.000070  |
| C  | 0.011300  | 2.296338  | -0.000098 |
| C  | -1.189161 | 1.621526  | -0.000149 |
| C  | -1.189885 | 0.247668  | 0.000035  |
| C  | -0.001926 | -0.457355 | -0.000066 |
| C  | 1.192638  | 0.234089  | -0.000043 |
| H  | 2.147516  | 2.137773  | 0.000143  |
| H  | 0.017505  | 3.378961  | -0.000184 |
| H  | -2.128086 | 2.159332  | -0.000226 |
| N  | -0.025190 | -1.904736 | -0.000266 |
| H  | -0.499985 | -2.286796 | -0.831039 |
| H  | 0.921826  | -2.306683 | -0.000361 |
| H  | -0.499911 | -2.287108 | 0.830389  |
| Cl | -2.690364 | -0.604028 | 0.000158  |
| Cl | 2.693872  | -0.617842 | 0.000116  |

2-Amino-1,1,3,3-tetracyano-1-propene

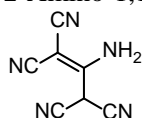

SMD(MeCN)-CAM-B3LYP/6-311+G(d,p)

E = -542.128103

Zero-point correction = 0.094384 (Hartree/Particle)

Thermal correction to Energy = 0.105806

Thermal correction to Enthalpy = 0.106750

Thermal correction to Gibbs Free Energy = 0.055586

Sum of electronic and zero-point Energies = -542.033719

Sum of electronic and thermal Energies = -542.022297

Sum of electronic and thermal Enthalpies = -542.021353

Sum of electronic and thermal Free Energies = -542.072517

|   |           |           |           |
|---|-----------|-----------|-----------|
| C | -1.171081 | 0.340891  | -0.115866 |
| H | -0.911297 | 1.344459  | -0.467064 |
| C | 0.103870  | -0.491921 | 0.043205  |
| C | 1.335128  | 0.120515  | -0.076315 |
| C | 1.481435  | 1.498512  | -0.365939 |
| N | 1.615046  | 2.617529  | -0.600301 |
| C | 2.517404  | -0.640723 | 0.105229  |
| N | 3.455888  | -1.289164 | 0.256984  |
| C | -2.077032 | -0.233549 | -1.116561 |
| N | -2.774658 | -0.670046 | -1.911524 |
| C | -1.849301 | 0.500217  | 1.176186  |
| N | -2.362819 | 0.640448  | 2.189094  |
| N | -0.059745 | -1.773961 | 0.311088  |
| H | -0.978221 | -2.188184 | 0.407976  |
| H | 0.730998  | -2.393580 | 0.442060  |

SMD(MeCN)-B3LYP/6-311+G(d,p)

E = -542.391373

Zero-point correction = 0.092640 (Hartree/Particle)



Thermal correction to Energy = 0.104286  
 Thermal correction to Enthalpy = 0.105231  
 Thermal correction to Gibbs Free Energy = 0.053033  
 Sum of electronic and zero-point Energies = -542.298733  
 Sum of electronic and thermal Energies = -542.287086  
 Sum of electronic and thermal Enthalpies = -542.286142  
 Sum of electronic and thermal Free Energies = -542.338339

|   |           |           |           |
|---|-----------|-----------|-----------|
| C | -1.178417 | 0.336353  | -0.113828 |
| H | -0.910877 | 1.340603  | -0.461829 |
| C | 0.102665  | -0.500492 | 0.048924  |
| C | 1.340947  | 0.117794  | -0.073311 |
| C | 1.486475  | 1.496390  | -0.361942 |
| N | 1.627959  | 2.621614  | -0.596052 |
| C | 2.528671  | -0.636913 | 0.104020  |
| N | 3.481159  | -1.277977 | 0.251291  |
| C | -2.083241 | -0.231048 | -1.124272 |
| N | -2.782157 | -0.660269 | -1.930735 |
| C | -1.865231 | 0.498881  | 1.176914  |
| N | -2.386592 | 0.643926  | 2.192030  |
| N | -0.059570 | -1.786964 | 0.319992  |
| H | -0.977829 | -2.202495 | 0.415566  |
| H | 0.731910  | -2.406204 | 0.451552  |

SMD(MeCN)-LC-BLYP/6-311+G(d,p)

E = -540.929643  
 Zero-point correction = 0.096502 (Hartree/Particle)  
 Thermal correction to Energy = 0.107685  
 Thermal correction to Enthalpy = 0.108629  
 Thermal correction to Gibbs Free Energy = 0.057972  
 Sum of electronic and zero-point Energies = -540.833141  
 Sum of electronic and thermal Energies = -540.821958  
 Sum of electronic and thermal Enthalpies = -540.821014  
 Sum of electronic and thermal Free Energies = -540.871671

|   |           |           |           |
|---|-----------|-----------|-----------|
| C | -1.161448 | 0.345513  | -0.119898 |
| H | -0.908695 | 1.347126  | -0.480727 |
| C | 0.102891  | -0.483123 | 0.036667  |
| C | 1.325377  | 0.120566  | -0.080758 |
| C | 1.474551  | 1.493988  | -0.374994 |
| N | 1.603806  | 2.603411  | -0.612461 |
| C | 2.499239  | -0.645629 | 0.107700  |
| N | 3.423392  | -1.297036 | 0.265643  |
| C | -2.069709 | -0.237850 | -1.102680 |
| N | -2.767514 | -0.684678 | -1.879368 |
| C | -1.824130 | 0.509154  | 1.171550  |
| N | -2.325008 | 0.649283  | 2.181230  |
| N | -0.064833 | -1.758274 | 0.304069  |
| H | -0.985707 | -2.170555 | 0.404281  |
| H | 0.724875  | -2.381228 | 0.437128  |

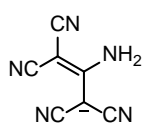

SMD(MeCN)-CAM-B3LYP/6-311+G(d,p)

E = -541.696925  
 Zero-point correction = 0.081151 (Hartree/Particle)  
 Thermal correction to Energy = 0.092525  
 Thermal correction to Enthalpy = 0.093469  
 Thermal correction to Gibbs Free Energy = 0.042744  
 Sum of electronic and zero-point Energies = -541.615775  
 Sum of electronic and thermal Energies = -541.604401  
 Sum of electronic and thermal Enthalpies = -541.603457  
 Sum of electronic and thermal Free Energies = -541.654181

|   |           |           |           |
|---|-----------|-----------|-----------|
| C | 1.248829  | 0.000349  | 0.039043  |
| C | 0.000000  | 0.676968  | 0.000000  |
| C | -1.248829 | 0.000349  | -0.039042 |
| C | -1.385433 | -1.337215 | -0.450577 |
| N | -1.536537 | -2.423730 | -0.813485 |
| C | -2.439491 | 0.708874  | 0.207866  |
| N | -3.410816 | 1.300463  | 0.413945  |
| C | 2.439491  | 0.708873  | -0.207867 |
| N | 3.410816  | 1.300463  | -0.413944 |
| C | 1.385433  | -1.337215 | 0.450579  |
| N | 1.536537  | -2.423730 | 0.813484  |
| N | 0.000000  | 2.016319  | -0.000001 |
| H | 0.845560  | 2.542808  | 0.163323  |
| H | -0.845560 | 2.542808  | -0.163324 |

SMD(MeCN)-B3LYP/6-311+G(d,p)

E = -541.959797  
 Zero-point correction = 0.079759 (Hartree/Particle)  
 Thermal correction to Energy = 0.091271  
 Thermal correction to Enthalpy = 0.092215  
 Thermal correction to Gibbs Free Energy = 0.041437  
 Sum of electronic and zero-point Energies = -541.880038  
 Sum of electronic and thermal Energies = -541.868526  
 Sum of electronic and thermal Enthalpies = -541.867582  
 Sum of electronic and thermal Free Energies = -541.918360

|   |           |           |           |
|---|-----------|-----------|-----------|
| C | -1.255279 | 0.002076  | -0.043827 |
| C | 0.000001  | 0.681341  | -0.000001 |
| C | 1.255279  | 0.002075  | 0.043827  |
| C | 1.395920  | -1.334925 | 0.460102  |
| N | 1.559058  | -2.425682 | 0.827253  |
| C | 2.448301  | 0.706138  | -0.212492 |
| N | 3.429146  | 1.292811  | -0.426499 |
| C | -2.448300 | 0.706142  | 0.212487  |
| N | -3.429143 | 1.292812  | 0.426509  |
| C | -1.395921 | -1.334926 | -0.460095 |
| N | -1.559062 | -2.425678 | -0.827258 |
| N | 0.000001  | 2.026551  | -0.000004 |
| H | -0.843570 | 2.553390  | -0.174726 |
| H | 0.843571  | 2.553390  | 0.174717  |

SMD(MeCN)-LC-BLYP/6-311+G(d,p)

E = -540.501627  
 Zero-point correction = 0.083059 (Hartree/Particle)  
 Thermal correction to Energy = 0.094133

Thermal correction to Enthalpy = 0.095077  
 Thermal correction to Gibbs Free Energy = 0.045333  
 Sum of electronic and zero-point Energies = -540.418568  
 Sum of electronic and thermal Energies = -540.407495  
 Sum of electronic and thermal Enthalpies = -540.406551  
 Sum of electronic and thermal Free Energies = -540.456294

|   |           |           |           |
|---|-----------|-----------|-----------|
| C | 1.242323  | -0.001123 | 0.025024  |
| C | 0.000000  | 0.667523  | -0.000001 |
| C | -1.242323 | -0.001122 | -0.025024 |
| C | -1.386187 | -1.351380 | -0.374439 |
| N | -1.540112 | -2.445029 | -0.680348 |
| C | -2.425083 | 0.725718  | 0.177982  |
| N | -3.382028 | 1.334924  | 0.344482  |
| C | 2.425083  | 0.725717  | -0.177985 |
| N | 3.382028  | 1.334924  | -0.344478 |
| C | 1.386187  | -1.351379 | 0.374442  |
| N | 1.540111  | -2.445030 | 0.680346  |
| N | 0.000000  | 2.000195  | -0.000002 |
| H | 0.852146  | 2.528190  | 0.128578  |
| H | -0.852145 | 2.528190  | -0.128581 |

1,1,3,3-tetracyano-2-methyl-1-propene

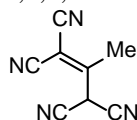

SMD(MeCN)-CAM-B3LYP/6-311+G(d,p)

E = -526.056754  
 Zero-point correction = 0.104630 (Hartree/Particle)  
 Thermal correction to Energy = 0.116430  
 Thermal correction to Enthalpy = 0.117374  
 Thermal correction to Gibbs Free Energy = 0.065874  
 Sum of electronic and zero-point Energies = -525.952124  
 Sum of electronic and thermal Energies = -525.940324  
 Sum of electronic and thermal Enthalpies = -525.939380  
 Sum of electronic and thermal Free Energies = -525.990880

|   |           |           |           |
|---|-----------|-----------|-----------|
| C | -1.160448 | 0.347564  | -0.182743 |
| H | -0.909848 | 1.278924  | -0.702082 |
| C | 0.095949  | -0.492884 | 0.061066  |
| C | 1.302679  | 0.082043  | -0.098757 |
| C | 1.478126  | 1.443244  | -0.505485 |
| N | 1.628963  | 2.533979  | -0.828238 |
| C | 2.514620  | -0.641513 | 0.143349  |
| N | 3.497787  | -1.202943 | 0.328698  |
| C | -2.128901 | -0.357957 | -1.030953 |
| N | -2.873338 | -0.896925 | -1.712840 |
| C | -1.779022 | 0.726184  | 1.095154  |
| N | -2.241161 | 1.036752  | 2.095201  |
| C | -0.100150 | -1.902545 | 0.480863  |
| H | -0.559051 | -2.466382 | -0.336985 |
| H | 0.835125  | -2.384876 | 0.755539  |
| H | -0.789114 | -1.948534 | 1.328823  |

SMD(MeCN)-B3LYP/6-311+G(d,p)

E = -526.322511  
 Zero-point correction = 0.102865 (Hartree/Particle)  
 Thermal correction to Energy = 0.114789  
 Thermal correction to Enthalpy = 0.115733  
 Thermal correction to Gibbs Free Energy = 0.063992  
 Sum of electronic and zero-point Energies = -526.219646  
 Sum of electronic and thermal Energies = -526.207722  
 Sum of electronic and thermal Enthalpies = -526.206778  
 Sum of electronic and thermal Free Energies = -526.258520

|   |           |           |           |
|---|-----------|-----------|-----------|
| C | -1.168806 | 0.344787  | -0.176741 |
| H | -0.910320 | 1.281311  | -0.686123 |
| C | 0.093809  | -0.502023 | 0.064565  |
| C | 1.308198  | 0.080717  | -0.096786 |
| C | 1.485180  | 1.442812  | -0.498986 |
| N | 1.646336  | 2.539654  | -0.820157 |
| C | 2.523497  | -0.638575 | 0.140456  |
| N | 3.518649  | -1.193866 | 0.321938  |
| C | -2.137010 | -0.347452 | -1.041155 |
| N | -2.883395 | -0.875016 | -1.739816 |
| C | -1.794049 | 0.717234  | 1.103379  |
| N | -2.262038 | 1.026709  | 2.108024  |
| C | -0.097697 | -1.916663 | 0.480585  |
| H | -0.564549 | -2.479899 | -0.335452 |
| H | 0.840868  | -2.400034 | 0.745536  |
| H | -0.781602 | -1.968757 | 1.334212  |

SMD(MeCN)-LC-BLYP/6-311+G(d,p)

E = -524.862116  
 Zero-point correction = 0.107001 (Hartree/Particle)  
 Thermal correction to Energy = 0.118618  
 Thermal correction to Enthalpy = 0.119562  
 Thermal correction to Gibbs Free Energy = 0.068244  
 Sum of electronic and zero-point Energies = -524.755115  
 Sum of electronic and thermal Energies = -524.743498  
 Sum of electronic and thermal Enthalpies = -524.742553  
 Sum of electronic and thermal Free Energies = -524.793872

|   |           |           |           |
|---|-----------|-----------|-----------|
| C | -1.150545 | 0.351779  | -0.190480 |
| H | -0.907992 | 1.277441  | -0.722682 |
| C | 0.096039  | -0.481301 | 0.055326  |
| C | 1.294276  | 0.082041  | -0.101490 |
| C | 1.471702  | 1.438540  | -0.512067 |
| N | 1.616741  | 2.520161  | -0.836180 |
| C | 2.497645  | -0.647636 | 0.146459  |
| N | 3.464894  | -1.216820 | 0.336418  |
| C | -2.119108 | -0.365946 | -1.015843 |
| N | -2.861911 | -0.916915 | -1.675387 |
| C | -1.755484 | 0.737935  | 1.083193  |
| N | -2.206910 | 1.049386  | 2.078164  |
| C | -0.107810 | -1.881244 | 0.478183  |
| H | -0.555967 | -2.446793 | -0.342624 |
| H | 0.821174  | -2.365397 | 0.768110  |
| H | -0.807205 | -1.920940 | 1.316416  |

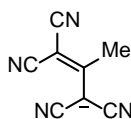

SMD(MeCN)-CAM-B3LYP/6-311+G(d,p)

E = -525.630755

Zero-point correction = 0.092176 (Hartree/Particle)

Thermal correction to Energy = 0.103651

Thermal correction to Enthalpy = 0.104595

Thermal correction to Gibbs Free Energy = 0.053470

Sum of electronic and zero-point Energies = -525.538579

Sum of electronic and thermal Energies = -525.527105

Sum of electronic and thermal Enthalpies = -525.526160

Sum of electronic and thermal Free Energies = -525.577285

|   |           |           |           |
|---|-----------|-----------|-----------|
| C | -1.248822 | -0.014268 | 0.000539  |
| C | 0.003942  | -0.637867 | -0.003624 |
| C | 1.244156  | 0.017728  | -0.004074 |
| C | 1.445693  | 1.416013  | -0.056522 |
| N | 1.675775  | 2.545507  | -0.106274 |
| C | 2.439977  | -0.737977 | 0.028853  |
| N | 3.422797  | -1.342773 | 0.058736  |
| C | -2.445166 | -0.771877 | -0.029102 |
| N | -3.439795 | -1.356666 | -0.055565 |
| C | -1.467452 | 1.383832  | 0.056314  |
| N | -1.710941 | 2.509915  | 0.108588  |
| C | 0.049666  | -2.140360 | -0.000456 |
| H | -0.939836 | -2.587130 | -0.042964 |
| H | 0.627239  | -2.502022 | -0.853401 |
| H | 0.545778  | -2.494066 | 0.906402  |

SMD(MeCN)-B3LYP/6-311+G(d,p)

E = -525.897254

Zero-point correction = 0.090714 (Hartree/Particle)

Thermal correction to Energy = 0.102304

Thermal correction to Enthalpy = 0.103248

Thermal correction to Gibbs Free Energy = 0.051845

Sum of electronic and zero-point Energies = -525.806540

Sum of electronic and thermal Energies = -525.794950

Sum of electronic and thermal Enthalpies = -525.794006

Sum of electronic and thermal Free Energies = -525.845410

|   |           |           |           |
|---|-----------|-----------|-----------|
| C | -1.254938 | 0.014575  | -0.001197 |
| C | 0.003985  | 0.643993  | 0.003418  |
| C | 1.250682  | -0.015679 | 0.004499  |
| C | 1.455247  | -1.414643 | 0.055420  |
| N | 1.694443  | -2.549284 | 0.104397  |
| C | 2.449716  | 0.736850  | -0.027918 |
| N | 3.443345  | 1.337278  | -0.057374 |
| C | -2.454178 | 0.769343  | 0.028566  |
| N | -3.458802 | 1.350842  | 0.055217  |
| C | -1.476175 | -1.384046 | -0.055477 |
| N | -1.728511 | -2.515258 | -0.106967 |
| C | 0.046874  | 2.151676  | 0.000044  |
| H | -0.945424 | 2.594860  | 0.042697  |
| H | 0.623188  | 2.517748  | 0.853795  |

H 0.541639 2.509926 -0.907538

SMD(MeCN)-LC-BLYP/6-311+G(d,p)

E = -524.437937

Zero-point correction = 0.094168 (Hartree/Particle)

Thermal correction to Energy = 0.105500

Thermal correction to Enthalpy = 0.106444

Thermal correction to Gibbs Free Energy = 0.055557

Sum of electronic and zero-point Energies = -524.343770

Sum of electronic and thermal Energies = -524.332438

Sum of electronic and thermal Enthalpies = -524.331494

Sum of electronic and thermal Free Energies = -524.382381

|   |           |           |           |
|---|-----------|-----------|-----------|
| C | -1.240244 | -0.014554 | -0.000135 |
| C | 0.003825  | -0.631179 | -0.004111 |
| C | 1.235142  | 0.019514  | -0.003742 |
| C | 1.431942  | 1.414231  | -0.062505 |
| N | 1.650456  | 2.536355  | -0.118319 |
| C | 2.425243  | -0.737135 | 0.032121  |
| N | 3.395640  | -1.344392 | 0.064437  |
| C | -2.431726 | -0.772087 | -0.032001 |
| N | -3.414540 | -1.358597 | -0.060210 |
| C | -1.454436 | 1.380160  | 0.062401  |
| N | -1.686642 | 2.498857  | 0.121012  |
| C | 0.052809  | -2.124374 | -0.001405 |
| H | -0.933094 | -2.577070 | -0.044318 |
| H | 0.633061  | -2.482024 | -0.852640 |
| H | 0.550305  | -2.473917 | 0.904776  |

1,1,3,3-tetracyanopropene

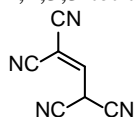

SMD(MeCN)-CAM-B3LYP/6-311+G(d,p)

E = -486.748416,  $\nu_{\min} = 8.96i \text{ cm}^{-1}$  (first-order saddle point)

Zero-point correction = 0.076846 (Hartree/Particle)

Thermal correction to Energy = 0.086221

Thermal correction to Enthalpy = 0.087165

Thermal correction to Gibbs Free Energy = 0.041357

Sum of electronic and zero-point Energies = -486.671569

Sum of electronic and thermal Energies = -486.662195

Sum of electronic and thermal Enthalpies = -486.661251

Sum of electronic and thermal Free Energies = -486.707058

|   |           |           |           |
|---|-----------|-----------|-----------|
| C | 1.200812  | 0.198526  | 0.066337  |
| H | 0.984679  | 1.220178  | 0.396456  |
| C | -0.071798 | -0.581903 | -0.180022 |
| C | -1.297222 | -0.076387 | -0.021957 |
| C | -1.550728 | 1.269788  | 0.400753  |
| N | -1.757818 | 2.345580  | 0.739106  |
| C | -2.451091 | -0.888653 | -0.277442 |
| N | -3.377957 | -1.532875 | -0.478494 |
| C | 1.992042  | -0.445071 | 1.122982  |
| N | 2.589751  | -0.944086 | 1.961727  |
| C | 1.981110  | 0.295313  | -1.174036 |

|   |          |           |           |
|---|----------|-----------|-----------|
| N | 2.567671 | 0.382825  | -2.152864 |
| H | 0.045035 | -1.609967 | -0.502470 |

SMD(MeCN)-B3LYP/6-311+G(d,p)

E = -486.989588  
Zero-point correction = 0.075548 (Hartree/Particle)  
Thermal correction to Energy = 0.085919  
Thermal correction to Enthalpy = 0.086863  
Thermal correction to Gibbs Free Energy = 0.037397  
Sum of electronic and zero-point Energies = -486.914040  
Sum of electronic and thermal Energies = -486.903669  
Sum of electronic and thermal Enthalpies = -486.902725  
Sum of electronic and thermal Free Energies = -486.952191

|   |           |           |           |
|---|-----------|-----------|-----------|
| C | 1.208134  | 0.205012  | -0.008807 |
| H | 0.986316  | 1.278148  | -0.057754 |
| C | -0.069542 | -0.616278 | 0.030273  |
| C | -1.302737 | -0.081870 | 0.005231  |
| C | -1.556472 | 1.326988  | -0.059417 |
| N | -1.771922 | 2.458832  | -0.109589 |
| C | -2.458545 | -0.929332 | 0.042995  |
| N | -3.395618 | -1.600644 | 0.073779  |
| C | 1.998735  | -0.023733 | 1.211277  |
| N | 2.596583  | -0.192083 | 2.179774  |
| C | 1.992793  | -0.134008 | -1.206777 |
| N | 2.584313  | -0.389840 | -2.159866 |
| H | 0.045986  | -1.692677 | 0.080409  |

SMD(MeCN)-LC-BLYP/6-311+G(d,p)

E = -485.653596  
Zero-point correction = 0.078852 (Hartree/Particle)  
Thermal correction to Energy = 0.088985  
Thermal correction to Enthalpy = 0.089929  
Thermal correction to Gibbs Free Energy = 0.039923  
Sum of electronic and zero-point Energies = -485.574744  
Sum of electronic and thermal Energies = -485.564611  
Sum of electronic and thermal Enthalpies = -485.563667  
Sum of electronic and thermal Free Energies = -485.613673

|   |           |           |           |
|---|-----------|-----------|-----------|
| C | 1.189241  | 0.206265  | -0.009801 |
| H | 0.976091  | 1.279270  | -0.059917 |
| C | -0.075603 | -0.605966 | 0.025233  |
| C | -1.288764 | -0.078940 | 0.002338  |
| C | -1.533445 | 1.329628  | -0.060261 |
| N | -1.728341 | 2.449435  | -0.108337 |
| C | -2.443120 | -0.923987 | 0.039801  |
| N | -3.364454 | -1.590536 | 0.070414  |
| C | 1.970119  | -0.027195 | 1.203021  |
| N | 2.559669  | -0.201401 | 2.158272  |
| C | 1.973511  | -0.136876 | -1.194044 |
| N | 2.566348  | -0.396551 | -2.127612 |
| H | 0.039730  | -1.683471 | 0.073036  |

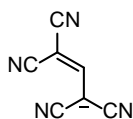

SMD(MeCN)-CAM-B3LYP/6-311+G(d,p)

E = -486.329242  
 Zero-point correction = 0.064721 (Hartree/Particle)  
 Thermal correction to Energy = 0.074531  
 Thermal correction to Enthalpy = 0.075476  
 Thermal correction to Gibbs Free Energy = 0.029092  
 Sum of electronic and zero-point Energies = -486.264521  
 Sum of electronic and thermal Energies = -486.254711  
 Sum of electronic and thermal Enthalpies = -486.253766  
 Sum of electronic and thermal Free Energies = -486.300151

|   |           |           |           |
|---|-----------|-----------|-----------|
| C | 0.000000  | 1.263396  | 0.217682  |
| C | 0.000000  | 0.000000  | 0.794228  |
| C | 0.000000  | -1.263396 | 0.217682  |
| C | -0.026933 | -1.519150 | -1.173982 |
| N | -0.055274 | -1.755755 | -2.302084 |
| C | 0.016221  | -2.402288 | 1.058666  |
| N | 0.031497  | -3.333346 | 1.739748  |
| C | -0.016221 | 2.402288  | 1.058666  |
| N | -0.031497 | 3.333346  | 1.739748  |
| C | 0.026933  | 1.519150  | -1.173982 |
| N | 0.055274  | 1.755755  | -2.302084 |
| H | 0.000000  | 0.000000  | 1.878941  |

SMD(MeCN)-B3LYP/6-311+G(d,p)

E = -486.571664  
 Zero-point correction = 0.063560 (Hartree/Particle)  
 Thermal correction to Energy = 0.073463  
 Thermal correction to Enthalpy = 0.074408  
 Thermal correction to Gibbs Free Energy = 0.026826  
 Sum of electronic and zero-point Energies = -486.508105  
 Sum of electronic and thermal Energies = -486.498201  
 Sum of electronic and thermal Enthalpies = -486.497257  
 Sum of electronic and thermal Free Energies = -486.544838

|   |           |           |           |
|---|-----------|-----------|-----------|
| C | -1.271110 | 0.215025  | -0.000281 |
| C | 0.000000  | 0.792465  | 0.000000  |
| C | 1.271110  | 0.215026  | 0.000281  |
| C | 1.538843  | -1.175275 | 0.016802  |
| N | 1.797829  | -2.305729 | 0.034625  |
| C | 2.408343  | 1.060220  | -0.009800 |
| N | 3.344284  | 1.746313  | -0.019283 |
| C | -2.408343 | 1.060219  | 0.009800  |
| N | -3.344285 | 1.746312  | 0.019284  |
| C | -1.538843 | -1.175275 | -0.016803 |
| N | -1.797828 | -2.305730 | -0.034625 |
| H | 0.000000  | 1.877410  | 0.000000  |

SMD(MeCN)-LC-BLYP/6-311+G(d,p)

E = -485.235670  
 Zero-point correction = 0.066518 (Hartree/Particle)  
 Thermal correction to Energy = 0.076104



Thermal correction to Enthalpy = 0.077048  
 Thermal correction to Gibbs Free Energy = 0.031028  
 Sum of electronic and zero-point Energies = -485.169152  
 Sum of electronic and thermal Energies = -485.159566  
 Sum of electronic and thermal Enthalpies = -485.158622  
 Sum of electronic and thermal Free Energies = -485.204643

|   |           |           |           |
|---|-----------|-----------|-----------|
| C | 0.000000  | 1.254126  | 0.218613  |
| C | 0.000000  | 0.000000  | 0.791382  |
| C | 0.000000  | -1.254126 | 0.218613  |
| C | -0.017639 | -1.502196 | -1.171023 |
| N | -0.035654 | -1.725435 | -2.292699 |
| C | 0.010184  | -2.391093 | 1.055420  |
| N | 0.019755  | -3.314796 | 1.731193  |
| C | -0.010184 | 2.391093  | 1.055420  |
| N | -0.019755 | 3.314796  | 1.731193  |
| C | 0.017639  | 1.502196  | -1.171023 |
| N | 0.035654  | 1.725435  | -2.292699 |
| H | 0.000000  | 0.000000  | 1.876673  |

1,1,3,3-tetracyano-2-trifluoromethyl-1-propene

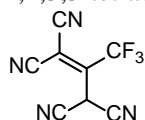

SMD(MeCN)-CAM-B3LYP/6-311+G(d,p)

E = -823.797564  
 Zero-point correction = 0.081153 (Hartree/Particle)  
 Thermal correction to Energy = 0.094981  
 Thermal correction to Enthalpy = 0.095925  
 Thermal correction to Gibbs Free Energy = 0.038942  
 Sum of electronic and zero-point Energies = -823.716411  
 Sum of electronic and thermal Energies = -823.702583  
 Sum of electronic and thermal Enthalpies = -823.701639  
 Sum of electronic and thermal Free Energies = -823.758622

|   |           |           |           |
|---|-----------|-----------|-----------|
| C | -1.156943 | 0.944617  | -0.058709 |
| H | -0.888755 | 1.999508  | -0.181286 |
| C | 0.115944  | 0.113304  | -0.014872 |
| C | 1.329068  | 0.677573  | -0.035018 |
| C | 1.514197  | 2.098188  | -0.102208 |
| N | 1.674777  | 3.231343  | -0.157718 |
| C | 2.540986  | -0.090245 | -0.002673 |
| N | 3.522486  | -0.680517 | 0.017375  |
| C | -2.006328 | 0.603831  | -1.207496 |
| N | -2.657533 | 0.366505  | -2.117604 |
| C | -1.908934 | 0.848590  | 1.199741  |
| N | -2.479003 | 0.802320  | 2.190546  |
| C | -0.024344 | -1.403042 | 0.046143  |
| F | 0.682581  | -1.920700 | 1.053552  |
| F | 0.402115  | -1.972021 | -1.086031 |
| F | -1.302275 | -1.751053 | 0.221773  |

SMD(MeCN)-B3LYP/6-311+G(d,p)

E = -824.111424  
 Zero-point correction = 0.079266 (Hartree/Particle)

Thermal correction to Energy = 0.093275  
 Thermal correction to Enthalpy = 0.094219  
 Thermal correction to Gibbs Free Energy = 0.036789  
 Sum of electronic and zero-point Energies = -824.032158  
 Sum of electronic and thermal Energies = -824.018150  
 Sum of electronic and thermal Enthalpies = -824.017205  
 Sum of electronic and thermal Free Energies = -824.074635

|   |           |           |           |
|---|-----------|-----------|-----------|
| C | -1.162195 | 0.944755  | -0.058310 |
| H | -0.883557 | 1.998500  | -0.180616 |
| C | 0.113313  | 0.104010  | -0.013568 |
| C | 1.334998  | 0.675682  | -0.034866 |
| C | 1.519102  | 2.095977  | -0.100999 |
| N | 1.689413  | 3.234662  | -0.155205 |
| C | 2.552665  | -0.081631 | -0.004430 |
| N | 3.550979  | -0.656812 | 0.012998  |
| C | -2.013955 | 0.614655  | -1.212575 |
| N | -2.669560 | 0.390776  | -2.130561 |
| C | -1.917052 | 0.859290  | 1.202934  |
| N | -2.489751 | 0.824874  | 2.199750  |
| C | -0.028538 | -1.417697 | 0.047274  |
| F | 0.677447  | -1.939188 | 1.064018  |
| F | 0.405102  | -1.992591 | -1.088934 |
| F | -1.312998 | -1.770804 | 0.218138  |

SMD(MeCN)-LC-BLYP/6-311+G(d,p)

E = -822.248825  
 Zero-point correction = 0.083629 (Hartree/Particle)  
 Thermal correction to Energy = 0.097210  
 Thermal correction to Enthalpy = 0.098155  
 Thermal correction to Gibbs Free Energy = 0.041658  
 Sum of electronic and zero-point Energies = -822.165196  
 Sum of electronic and thermal Energies = -822.151614  
 Sum of electronic and thermal Enthalpies = -822.150670  
 Sum of electronic and thermal Free Energies = -822.207167

|   |           |           |           |
|---|-----------|-----------|-----------|
| C | -1.148028 | 0.945971  | -0.056496 |
| H | -0.888686 | 2.003481  | -0.172257 |
| C | 0.117809  | 0.124114  | -0.014726 |
| C | 1.321983  | 0.675498  | -0.032498 |
| C | 1.512979  | 2.092783  | -0.094543 |
| N | 1.669598  | 3.217530  | -0.145687 |
| C | 2.522601  | -0.105571 | -0.002007 |
| N | 3.483122  | -0.712633 | 0.016815  |
| C | -1.987735 | 0.602911  | -1.202697 |
| N | -2.629023 | 0.357357  | -2.107016 |
| C | -1.899790 | 0.832490  | 1.192237  |
| N | -2.469819 | 0.767369  | 2.172157  |
| C | -0.024448 | -1.383256 | 0.043707  |
| F | 0.669638  | -1.898359 | 1.050699  |
| F | 0.408464  | -1.946795 | -1.078570 |
| F | -1.298178 | -1.723788 | 0.207928  |

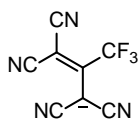

SMD(MeCN)-CAM-B3LYP/6-311+G(d,p)

E = -823.380575  
 Zero-point correction = 0.068780 (Hartree/Particle)  
 Thermal correction to Energy = 0.082027  
 Thermal correction to Enthalpy = 0.082972  
 Thermal correction to Gibbs Free Energy = 0.027535  
 Sum of electronic and zero-point Energies = -823.311795  
 Sum of electronic and thermal Energies = -823.298547  
 Sum of electronic and thermal Enthalpies = -823.297603  
 Sum of electronic and thermal Free Energies = -823.353040

|   |           |           |           |
|---|-----------|-----------|-----------|
| C | 1.251442  | 0.565974  | -0.083902 |
| C | -0.000056 | -0.052499 | -0.051526 |
| C | -1.227525 | 0.610204  | 0.017202  |
| C | -1.317832 | 1.978620  | 0.375084  |
| N | -1.435267 | 3.075724  | 0.706793  |
| C | -2.497112 | 0.003617  | -0.163095 |
| N | -3.563197 | -0.413352 | -0.292831 |
| C | 2.479005  | -0.096614 | 0.172215  |
| N | 3.504750  | -0.572761 | 0.392239  |
| C | 1.408977  | 1.938215  | -0.398806 |
| N | 1.583700  | 3.037159  | -0.697913 |
| C | -0.026876 | -1.578088 | -0.016127 |
| F | -0.091603 | -2.019299 | 1.252751  |
| F | -1.081845 | -2.085107 | -0.665107 |
| F | 1.056776  | -2.129367 | -0.572564 |

SMD(MeCN)-B3LYP/6-311+G(d,p)

E = -823.695873  
 Zero-point correction = 0.067168 (Hartree/Particle)  
 Thermal correction to Energy = 0.080582  
 Thermal correction to Enthalpy = 0.081526  
 Thermal correction to Gibbs Free Energy = 0.025757  
 Sum of electronic and zero-point Energies = -823.628705  
 Sum of electronic and thermal Energies = -823.615291  
 Sum of electronic and thermal Enthalpies = -823.614347  
 Sum of electronic and thermal Free Energies = -823.670116

|   |           |           |           |
|---|-----------|-----------|-----------|
| C | -1.259259 | -0.564520 | -0.086357 |
| C | 0.000581  | 0.057721  | -0.052397 |
| C | 1.232202  | -0.615597 | 0.022019  |
| C | 1.317982  | -1.984681 | 0.381364  |
| N | 1.439351  | -3.087711 | 0.715868  |
| C | 2.506393  | -0.020405 | -0.163641 |
| N | 3.583571  | 0.386575  | -0.296143 |
| C | -2.487689 | 0.093220  | 0.177698  |
| N | -3.522432 | 0.564146  | 0.403671  |
| C | -1.420635 | -1.935931 | -0.405880 |
| N | -1.606949 | -3.038549 | -0.711026 |
| C | 0.031566  | 1.587297  | -0.017940 |
| F | 0.101767  | 2.037047  | 1.257673  |

|   |           |          |           |
|---|-----------|----------|-----------|
| F | 1.091382  | 2.096615 | -0.674085 |
| F | -1.057775 | 2.147022 | -0.574231 |

SMD(MeCN)-LC-BLYP/6-311+G(d,p)

E = -821.833074  
 Zero-point correction = 0.070871 (Hartree/Particle)  
 Thermal correction to Energy = 0.083956  
 Thermal correction to Enthalpy = 0.084900  
 Thermal correction to Gibbs Free Energy = 0.029112  
 Sum of electronic and zero-point Energies = -821.762203  
 Sum of electronic and thermal Energies = -821.749118  
 Sum of electronic and thermal Enthalpies = -821.748174  
 Sum of electronic and thermal Free Energies = -821.803961

|   |           |           |           |
|---|-----------|-----------|-----------|
| C | 1.241451  | 0.566821  | -0.079286 |
| C | 0.000506  | -0.046809 | -0.051760 |
| C | -1.221420 | 0.601865  | 0.009865  |
| C | -1.319354 | 1.967837  | 0.361408  |
| N | -1.438013 | 3.057294  | 0.685859  |
| C | -2.483547 | -0.016181 | -0.159209 |
| N | -3.536601 | -0.443243 | -0.280337 |
| C | 2.466018  | -0.098081 | 0.167205  |
| N | 3.481736  | -0.576774 | 0.379951  |
| C | 1.395144  | 1.937778  | -0.385762 |
| N | 1.560520  | 3.030898  | -0.675909 |
| C | -0.020633 | -1.564604 | -0.016001 |
| F | -0.077607 | -1.996777 | 1.246348  |
| F | -1.070620 | -2.070969 | -0.655658 |
| F | 1.056840  | -2.106585 | -0.573549 |

1,1,2,3,3-pentacyanopropene

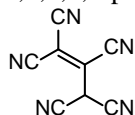

SMD(MeCN)-CAM-B3LYP/6-311+G(d,p)

E = -578.953136  
 Zero-point correction = 0.075409 (Hartree/Particle)  
 Thermal correction to Energy = 0.087425  
 Thermal correction to Enthalpy = 0.088369  
 Thermal correction to Gibbs Free Energy = 0.036068  
 Sum of electronic and zero-point Energies = -578.877727  
 Sum of electronic and thermal Energies = -578.865711  
 Sum of electronic and thermal Enthalpies = -578.864767  
 Sum of electronic and thermal Free Energies = -578.917068

|   |           |           |           |
|---|-----------|-----------|-----------|
| C | 1.170805  | -0.563238 | -0.146525 |
| H | 0.903489  | -1.565891 | -0.498333 |
| C | -0.096232 | 0.280190  | -0.023444 |
| C | -1.328586 | -0.253362 | -0.093070 |
| C | 0.062471  | 1.682700  | 0.193262  |
| N | 0.215378  | 2.806250  | 0.364171  |
| C | -1.551818 | -1.651570 | -0.301528 |
| N | -1.746729 | -2.768607 | -0.467907 |
| C | -2.501296 | 0.556478  | 0.046028  |
| N | -3.445967 | 1.195687  | 0.156148  |

|   |          |           |           |
|---|----------|-----------|-----------|
| C | 2.101650 | -0.000642 | -1.131082 |
| N | 2.815354 | 0.429867  | -1.914566 |
| C | 1.820705 | -0.723695 | 1.161171  |
| N | 2.309151 | -0.862521 | 2.186364  |

SMD(MeCN)-B3LYP/6-311+G(d,p)

E = -579.235766

Zero-point correction = 0.073770 (Hartree/Particle)

Thermal correction to Energy = 0.085922

Thermal correction to Enthalpy = 0.086866

Thermal correction to Gibbs Free Energy = 0.034194

Sum of electronic and zero-point Energies = -579.161996

Sum of electronic and thermal Energies = -579.149845

Sum of electronic and thermal Enthalpies = -579.148900

Sum of electronic and thermal Free Energies = -579.201573

|   |           |           |           |
|---|-----------|-----------|-----------|
| C | 1.177074  | -0.563108 | -0.144740 |
| H | 0.900342  | -1.565406 | -0.494440 |
| C | -0.093641 | 0.290734  | -0.020577 |
| C | -1.336921 | -0.248772 | -0.091932 |
| C | 0.068881  | 1.689390  | 0.194646  |
| N | 0.232082  | 2.818807  | 0.365717  |
| C | -1.563760 | -1.645050 | -0.299634 |
| N | -1.772564 | -2.766792 | -0.465653 |
| C | -2.510540 | 0.558255  | 0.045173  |
| N | -3.466485 | 1.193381  | 0.153280  |
| C | 2.110444  | -0.009432 | -1.136201 |
| N | 2.829298  | 0.411653  | -1.928928 |
| C | 1.829887  | -0.727480 | 1.164373  |
| N | 2.322113  | -0.871594 | 2.193841  |

SMD(MeCN)-LC-BLYP/6-311+G(d,p)

E = -577.661023

Zero-point correction = 0.077663 (Hartree/Particle)

Thermal correction to Energy = 0.089468

Thermal correction to Enthalpy = 0.090412

Thermal correction to Gibbs Free Energy = 0.038606

Sum of electronic and zero-point Energies = -577.583360

Sum of electronic and thermal Energies = -577.571555

Sum of electronic and thermal Enthalpies = -577.570611

Sum of electronic and thermal Free Energies = -577.622417

|   |           |           |           |
|---|-----------|-----------|-----------|
| C | 1.161670  | -0.565304 | -0.147167 |
| H | 0.902737  | -1.570193 | -0.498207 |
| C | -0.097691 | 0.267745  | -0.025315 |
| C | -1.318406 | -0.255851 | -0.092503 |
| C | 0.061524  | 1.670626  | 0.190566  |
| N | 0.209374  | 2.785557  | 0.359710  |
| C | -1.542565 | -1.652238 | -0.299582 |
| N | -1.728431 | -2.761708 | -0.463958 |
| C | -2.485273 | 0.558879  | 0.046941  |
| N | -3.415188 | 1.203219  | 0.157948  |
| C | 2.085599  | 0.001740  | -1.125643 |
| N | 2.790821  | 0.439070  | -1.900652 |
| C | 1.808595  | -0.718184 | 1.155083  |

N 2.294359 -0.848177 2.173228

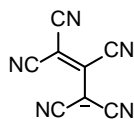

SMD(MeCN)-CAM-B3LYP/6-311+G(d,p)

E = -578.540545

Zero-point correction = 0.062887 (Hartree/Particle)

Thermal correction to Energy = 0.074529

Thermal correction to Enthalpy = 0.075473

Thermal correction to Gibbs Free Energy = 0.023932

Sum of electronic and zero-point Energies = -578.477658

Sum of electronic and thermal Energies = -578.466017

Sum of electronic and thermal Enthalpies = -578.465072

Sum of electronic and thermal Free Energies = -578.516613

|   |           |           |           |
|---|-----------|-----------|-----------|
| C | -1.264595 | -0.184686 | -0.002396 |
| C | 0.000002  | 0.410764  | 0.000003  |
| C | 1.264597  | -0.184690 | 0.002400  |
| C | 0.000004  | 1.851337  | 0.000005  |
| N | 0.000004  | 2.997972  | 0.000016  |
| C | 1.480616  | -1.582310 | 0.043524  |
| N | 1.709424  | -2.710496 | 0.082811  |
| C | 2.437915  | 0.607483  | -0.022792 |
| N | 3.403624  | 1.235894  | -0.045017 |
| C | -2.437912 | 0.607489  | 0.022794  |
| N | -3.403619 | 1.235906  | 0.044981  |
| C | -1.480620 | -1.582305 | -0.043522 |
| N | -1.709439 | -2.710489 | -0.082806 |

SMD(MeCN)-B3LYP/6-311+G(d,p)

E = -578.824215

Zero-point correction = 0.061579 (Hartree/Particle)

Thermal correction to Energy = 0.073322

Thermal correction to Enthalpy = 0.074267

Thermal correction to Gibbs Free Energy = 0.022546

Sum of electronic and zero-point Energies = -578.762636

Sum of electronic and thermal Energies = -578.750893

Sum of electronic and thermal Enthalpies = -578.749949

Sum of electronic and thermal Free Energies = -578.801669

|   |           |           |           |
|---|-----------|-----------|-----------|
| C | 1.272330  | 0.183651  | -0.002489 |
| C | 0.000008  | -0.419341 | -0.000103 |
| C | -1.272323 | 0.183684  | 0.002304  |
| C | -0.000019 | -1.857154 | -0.000023 |
| N | -0.000074 | -3.010763 | 0.000002  |
| C | -1.490227 | 1.581253  | 0.040688  |
| N | -1.728655 | 2.714629  | 0.077667  |
| C | -2.448464 | -0.604677 | -0.021302 |
| N | -3.425767 | -1.228087 | -0.041954 |
| C | 2.448504  | -0.604713 | 0.021269  |
| N | 3.425830  | -1.228068 | 0.042179  |
| C | 1.490252  | 1.581236  | -0.040723 |
| N | 1.728614  | 2.714627  | -0.077569 |

SMD(MeCN)-LC-BLYP/6-311+G(d,p)

E = -577.250122

Zero-point correction = 0.064797 (Hartree/Particle)

Thermal correction to Energy = 0.076262

Thermal correction to Enthalpy = 0.077206

Thermal correction to Gibbs Free Energy = 0.026097

Sum of electronic and zero-point Energies = -577.185325

Sum of electronic and thermal Energies = -577.173860

Sum of electronic and thermal Enthalpies = -577.172915

Sum of electronic and thermal Free Energies = -577.224025

|   |           |           |           |
|---|-----------|-----------|-----------|
| C | -1.254719 | -0.185273 | -0.002706 |
| C | 0.000000  | 0.400946  | -0.000001 |
| C | 1.254719  | -0.185273 | 0.002705  |
| C | 0.000000  | 1.840317  | -0.000002 |
| N | 0.000000  | 2.977746  | -0.000002 |
| C | 1.469340  | -1.579927 | 0.047486  |
| N | 1.687797  | -2.700624 | 0.089544  |
| C | 2.421927  | 0.609496  | -0.024523 |
| N | 3.373958  | 1.241813  | -0.048554 |
| C | -2.421927 | 0.609496  | 0.024524  |
| N | -3.373958 | 1.241813  | 0.048555  |
| C | -1.469339 | -1.579927 | -0.047485 |
| N | -1.687797 | -2.700625 | -0.089541 |

1,1-bis(phenylsulfonyl)ethylene

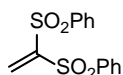

SMD(DCE)-CAM-B3LYP/6-311+G(d,p)

E = -1637.714023

Zero-point correction = 0.236542 (Hartree/Particle)

Thermal correction to Energy = 0.254205

Thermal correction to Enthalpy = 0.255149

Thermal correction to Gibbs Free Energy = 0.188855

Sum of electronic and zero-point Energies = -1637.477482

Sum of electronic and thermal Energies = -1637.459818

Sum of electronic and thermal Enthalpies = -1637.458874

Sum of electronic and thermal Free Energies = -1637.525168

|   |           |           |           |
|---|-----------|-----------|-----------|
| C | 0.000000  | 0.000000  | 2.636667  |
| H | 0.784401  | -0.503230 | 3.190080  |
| H | -0.784401 | 0.503230  | 3.190080  |
| C | 0.000000  | 0.000000  | 1.315296  |
| S | -1.318242 | 0.823085  | 0.407441  |
| O | -1.652342 | -0.016576 | -0.737774 |
| O | -2.342107 | 1.138095  | 1.399453  |
| S | 1.318242  | -0.823085 | 0.407441  |
| O | 1.652342  | 0.016576  | -0.737774 |
| O | 2.342107  | -1.138095 | 1.399453  |
| C | -0.627012 | 2.353862  | -0.181447 |
| C | -0.243813 | 2.454652  | -1.510471 |
| C | -0.515589 | 3.419535  | 0.702998  |

|   |           |           |           |
|---|-----------|-----------|-----------|
| C | 0.262412  | 3.663848  | -1.965108 |
| H | -0.343152 | 1.606368  | -2.173447 |
| C | 0.000000  | 4.618344  | 0.236111  |
| H | -0.831831 | 3.319277  | 1.733635  |
| C | 0.386411  | 4.738789  | -1.094284 |
| H | 0.561476  | 3.763363  | -3.001187 |
| H | 0.093650  | 5.460542  | 0.910394  |
| H | 0.784954  | 5.679700  | -1.454637 |
| C | 0.627012  | -2.353862 | -0.181447 |
| C | 0.243813  | -2.454652 | -1.510471 |
| C | 0.515589  | -3.419535 | 0.702998  |
| C | -0.262412 | -3.663848 | -1.965108 |
| H | 0.343152  | -1.606368 | -2.173447 |
| C | 0.000000  | -4.618344 | 0.236111  |
| H | 0.831831  | -3.319277 | 1.733635  |
| C | -0.386411 | -4.738789 | -1.094284 |
| H | -0.561476 | -3.763363 | -3.001187 |
| H | -0.093650 | -5.460542 | 0.910394  |
| H | -0.784954 | -5.679700 | -1.454637 |

### TS-AD\_tBu\_1a

SMD(DCE)-CAM-B3LYP/6-311+G(d,p)

E = -2553.236330

Zero-point correction = 0.638689 (Hartree/Particle)

Thermal correction to Energy = 0.679834

Thermal correction to Enthalpy = 0.680778

Thermal correction to Gibbs Free Energy = 0.562339

Sum of electronic and zero-point Energies = -2552.597754

Sum of electronic and thermal Energies = -2552.556609

Sum of electronic and thermal Enthalpies = -2552.555665

Sum of electronic and thermal Free Energies = -2552.674104

|   |           |           |           |
|---|-----------|-----------|-----------|
| C | -0.524392 | -0.793879 | 0.143550  |
| H | 0.123113  | -0.532651 | 0.970763  |
| H | -0.490405 | -1.822921 | -0.183953 |
| C | -1.746307 | -0.154567 | 0.052789  |
| S | -3.039332 | -0.866959 | -0.923600 |
| O | -3.769523 | 0.192822  | -1.620108 |
| O | -2.409595 | -1.929629 | -1.711592 |
| S | -2.077236 | 1.314757  | 0.975675  |
| O | -3.481184 | 1.280378  | 1.386657  |
| O | -1.032151 | 1.405509  | 1.996815  |
| C | -4.177267 | -1.656707 | 0.205954  |
| C | -5.401074 | -1.059603 | 0.465068  |
| C | -3.816780 | -2.868448 | 0.782033  |
| C | -6.287780 | -1.696991 | 1.321785  |
| H | -5.650797 | -0.114201 | 0.003884  |
| C | -4.708317 | -3.491133 | 1.642215  |
| H | -2.860900 | -3.324492 | 0.556873  |
| C | -5.940943 | -2.906120 | 1.910836  |
| H | -7.249386 | -1.244298 | 1.530693  |
| H | -4.442304 | -4.436568 | 2.098901  |
| H | -6.635350 | -3.397524 | 2.582063  |



|    |           |           |           |
|----|-----------|-----------|-----------|
| C  | -1.869160 | 2.724112  | -0.104386 |
| C  | -2.926804 | 3.133534  | -0.906080 |
| C  | -0.653429 | 3.394389  | -0.099722 |
| C  | -2.752025 | 4.237351  | -1.727617 |
| H  | -3.863235 | 2.593873  | -0.891409 |
| C  | -0.492498 | 4.497543  | -0.926123 |
| H  | 0.144538  | 3.066574  | 0.552934  |
| C  | -1.538283 | 4.915037  | -1.740020 |
| H  | -3.567913 | 4.569842  | -2.357781 |
| H  | 0.448323  | 5.034430  | -0.928405 |
| H  | -1.409426 | 5.777411  | -2.383387 |
| C  | 0.878839  | -0.136479 | -1.276769 |
| C  | 1.641149  | -1.326483 | -1.462358 |
| C  | 0.073085  | 0.373220  | -2.432552 |
| H  | 1.299068  | 0.623609  | -0.628933 |
| H  | 1.240632  | -2.032818 | -2.177809 |
| C  | 2.756355  | -1.707204 | -0.778875 |
| H  | -0.444516 | -0.437430 | -2.948031 |
| H  | -0.660134 | 1.119915  | -2.128178 |
| H  | 0.746665  | 0.850272  | -3.153963 |
| O  | 3.341329  | -0.896734 | 0.123121  |
| Si | 4.348545  | 0.470444  | 0.193102  |
| C  | 3.999899  | 1.590039  | -1.261466 |
| C  | 6.142663  | -0.050607 | 0.125138  |
| C  | 3.954146  | 1.268663  | 1.866856  |
| H  | 4.765801  | 2.370201  | -1.308972 |
| H  | 4.049799  | 1.033052  | -2.201649 |
| H  | 3.026992  | 2.081533  | -1.211413 |
| H  | 6.775591  | 0.813320  | 0.350036  |
| H  | 6.382813  | -0.832962 | 0.848554  |
| H  | 6.424044  | -0.404845 | -0.868849 |
| C  | 4.891304  | 2.468237  | 2.082729  |
| H  | 4.649736  | 2.962350  | 3.030684  |
| H  | 5.941222  | 2.168704  | 2.130267  |
| H  | 4.791089  | 3.217924  | 1.291818  |
| C  | 4.167146  | 0.253765  | 2.999123  |
| H  | 3.498406  | -0.605292 | 2.903581  |
| H  | 5.194219  | -0.120872 | 3.028057  |
| H  | 3.963351  | 0.724548  | 3.967900  |
| C  | 2.503706  | 1.763988  | 1.902466  |
| H  | 2.281778  | 2.210552  | 2.878609  |
| H  | 2.320870  | 2.532371  | 1.146596  |
| H  | 1.786862  | 0.955247  | 1.747689  |
| C  | 3.380827  | -3.092513 | -0.889442 |
| C  | 4.827239  | -2.980002 | -1.393391 |
| C  | 3.382987  | -3.727337 | 0.512582  |
| C  | 2.605777  | -4.008609 | -1.840267 |
| H  | 4.873194  | -2.471221 | -2.360016 |
| H  | 5.458437  | -2.442500 | -0.688527 |
| H  | 5.248246  | -3.980563 | -1.519719 |
| H  | 2.365522  | -3.840217 | 0.896304  |
| H  | 3.838211  | -4.719762 | 0.464488  |
| H  | 3.951071  | -3.124260 | 1.221440  |

|   |          |           |           |
|---|----------|-----------|-----------|
| H | 3.084158 | -4.990457 | -1.853605 |
| H | 1.570325 | -4.148982 | -1.522629 |
| H | 2.604360 | -3.629824 | -2.865014 |

**TS-AD\_tBu\_1b**

SMD(DCE)-CAM-B3LYP/6-311+G(d,p)

E = -2553.235106  
 Zero-point correction = 0.638702 (Hartree/Particle)  
 Thermal correction to Energy = 0.679994  
 Thermal correction to Enthalpy = 0.680938  
 Thermal correction to Gibbs Free Energy = 0.560535  
 Sum of electronic and zero-point Energies = -2552.596469  
 Sum of electronic and thermal Energies = -2552.555177  
 Sum of electronic and thermal Enthalpies = -2552.554233  
 Sum of electronic and thermal Free Energies = -2552.674636

|   |           |           |           |
|---|-----------|-----------|-----------|
| C | -0.383747 | -0.223752 | 0.742838  |
| H | 0.375491  | 0.539521  | 0.637411  |
| H | -0.278915 | -0.886182 | 1.590758  |
| C | -1.668424 | 0.061249  | 0.329083  |
| S | -3.048270 | -0.764988 | 1.069117  |
| O | -2.511346 | -1.513591 | 2.208396  |
| O | -4.087122 | 0.240128  | 1.301403  |
| S | -1.951190 | 1.386617  | -0.804470 |
| O | -0.670279 | 1.609999  | -1.479468 |
| O | -3.136436 | 1.089611  | -1.609475 |
| C | -3.726443 | -1.977880 | -0.058385 |
| C | -3.388591 | -3.312851 | 0.118999  |
| C | -4.615919 | -1.575602 | -1.046447 |
| C | -3.946545 | -4.264316 | -0.723251 |
| H | -2.711570 | -3.601930 | 0.911655  |
| C | -5.164172 | -2.536760 | -1.882700 |
| H | -4.868119 | -0.531072 | -1.161171 |
| C | -4.828628 | -3.876379 | -1.723747 |
| H | -3.694615 | -5.309756 | -0.592705 |
| H | -5.858767 | -2.237221 | -2.658063 |
| H | -5.262572 | -4.622190 | -2.379315 |
| C | -2.300305 | 2.856027  | 0.151711  |
| C | -1.237278 | 3.626661  | 0.605050  |
| C | -3.618592 | 3.206705  | 0.406134  |
| C | -1.506854 | 4.776349  | 1.333007  |
| H | -0.217795 | 3.343245  | 0.377491  |
| C | -3.873948 | 4.361237  | 1.131978  |
| H | -4.425869 | 2.585624  | 0.044250  |
| C | -2.821897 | 5.141638  | 1.595861  |
| H | -0.688484 | 5.390474  | 1.688649  |
| H | -4.897896 | 4.650591  | 1.334805  |
| H | -3.027884 | 6.042126  | 2.162444  |
| C | 0.710677  | -1.407126 | -0.647042 |
| C | 1.595775  | -2.100447 | 0.220566  |
| C | -0.307519 | -2.187575 | -1.414891 |
| H | 1.087431  | -0.528353 | -1.151590 |
| H | 1.233880  | -3.036931 | 0.624419  |
| C | 2.817232  | -1.672534 | 0.655831  |

|    |           |           |           |
|----|-----------|-----------|-----------|
| H  | -0.742589 | -2.987628 | -0.814326 |
| H  | -1.111003 | -1.555110 | -1.794342 |
| H  | 0.177009  | -2.651597 | -2.282243 |
| O  | 3.357473  | -0.522144 | 0.221209  |
| Si | 4.106712  | 0.220283  | -1.108880 |
| C  | 3.229230  | -0.216565 | -2.699990 |
| C  | 5.876699  | -0.362202 | -1.243007 |
| C  | 4.022033  | 2.070447  | -0.705456 |
| H  | 3.865935  | 0.064288  | -3.544732 |
| H  | 3.055799  | -1.293983 | -2.772876 |
| H  | 2.271047  | 0.291076  | -2.825375 |
| H  | 6.384875  | 0.212978  | -2.023787 |
| H  | 6.439246  | -0.231427 | -0.316725 |
| H  | 5.930865  | -1.414762 | -1.532051 |
| C  | 4.416229  | 2.869396  | -1.958480 |
| H  | 4.411054  | 3.942060  | -1.733441 |
| H  | 5.421031  | 2.617847  | -2.311154 |
| H  | 3.719502  | 2.706713  | -2.785134 |
| C  | 4.995246  | 2.412607  | 0.431772  |
| H  | 4.771106  | 1.852390  | 1.343973  |
| H  | 6.033665  | 2.207505  | 0.158084  |
| H  | 4.925562  | 3.479084  | 0.676134  |
| C  | 2.600815  | 2.465696  | -0.283736 |
| H  | 2.555773  | 3.545584  | -0.098810 |
| H  | 1.857241  | 2.233582  | -1.050175 |
| H  | 2.304171  | 1.959861  | 0.638353  |
| C  | 3.633993  | -2.392257 | 1.721415  |
| C  | 4.952806  | -2.893434 | 1.112206  |
| C  | 3.944757  | -1.394494 | 2.850247  |
| C  | 2.888475  | -3.588975 | 2.317986  |
| H  | 4.769679  | -3.575262 | 0.277499  |
| H  | 5.570951  | -2.070744 | 0.756962  |
| H  | 5.523011  | -3.434970 | 1.871388  |
| H  | 3.026728  | -1.027574 | 3.317126  |
| H  | 4.541856  | -1.887883 | 3.621160  |
| H  | 4.505743  | -0.536267 | 2.479851  |
| H  | 3.508738  | -4.041360 | 3.094978  |
| H  | 1.942587  | -3.294025 | 2.777548  |
| H  | 2.684524  | -4.359559 | 1.571207  |

### TS-AD\_tBu\_1c

SMD(DCE)-CAM-B3LYP/6-311+G(d,p)

E = -2553.233965

Zero-point correction = 0.638493 (Hartree/Particle)

Thermal correction to Energy = 0.679850

Thermal correction to Enthalpy = 0.680794

Thermal correction to Gibbs Free Energy = 0.559989

Sum of electronic and zero-point Energies = -2552.595441

Sum of electronic and thermal Energies = -2552.554084

Sum of electronic and thermal Enthalpies = -2552.553140

Sum of electronic and thermal Free Energies = -2552.673945

|   |           |           |          |
|---|-----------|-----------|----------|
| C | -0.359568 | -0.690999 | 0.132543 |
| H | 0.199550  | 0.188358  | 0.428485 |

|    |           |           |           |
|----|-----------|-----------|-----------|
| H  | -0.277859 | -1.546025 | 0.788317  |
| C  | -1.555910 | -0.527016 | -0.534124 |
| S  | -2.681013 | -1.896537 | -0.646339 |
| O  | -2.977396 | -2.224037 | -2.038638 |
| O  | -2.097750 | -2.942008 | 0.201021  |
| S  | -1.934820 | 1.006742  | -1.321431 |
| O  | -0.711457 | 1.490900  | -1.963968 |
| O  | -3.149739 | 0.832414  | -2.115325 |
| C  | -4.201882 | -1.368852 | 0.125108  |
| C  | -5.302463 | -1.083031 | -0.668464 |
| C  | -4.255987 | -1.289617 | 1.511390  |
| C  | -6.488564 | -0.705174 | -0.053411 |
| H  | -5.225955 | -1.155181 | -1.744707 |
| C  | -5.445310 | -0.907903 | 2.112690  |
| H  | -3.386596 | -1.528560 | 2.111232  |
| C  | -6.558374 | -0.616655 | 1.331161  |
| H  | -7.358378 | -0.480873 | -0.658768 |
| H  | -5.504846 | -0.843307 | 3.192274  |
| H  | -7.486696 | -0.321684 | 1.806149  |
| C  | -2.317103 | 2.154888  | -0.003688 |
| C  | -1.299808 | 2.931881  | 0.533191  |
| C  | -3.626812 | 2.254366  | 0.447178  |
| C  | -1.603263 | 3.822876  | 1.552899  |
| H  | -0.292650 | 2.853913  | 0.146361  |
| C  | -3.917071 | 3.150504  | 1.465804  |
| H  | -4.407277 | 1.651397  | 0.001703  |
| C  | -2.907829 | 3.929427  | 2.019331  |
| H  | -0.820066 | 4.439352  | 1.977152  |
| H  | -4.935370 | 3.243258  | 1.823248  |
| H  | -3.140868 | 4.628691  | 2.813601  |
| C  | 1.213977  | -1.292603 | -1.168201 |
| C  | 2.006410  | -2.083712 | -0.291118 |
| C  | 0.535315  | -1.960001 | -2.322471 |
| H  | 1.529754  | -0.273304 | -1.345692 |
| H  | 1.704043  | -3.117044 | -0.181066 |
| C  | 3.051756  | -1.661132 | 0.475798  |
| H  | 0.099037  | -2.919558 | -2.038035 |
| H  | -0.241865 | -1.333663 | -2.759591 |
| H  | 1.277734  | -2.155156 | -3.105264 |
| O  | 3.524275  | -0.403591 | 0.396589  |
| Si | 4.422330  | 0.615601  | -0.623765 |
| C  | 3.937344  | 0.377575  | -2.412598 |
| C  | 6.244773  | 0.236700  | -0.463095 |
| C  | 4.024933  | 2.353690  | 0.018258  |
| H  | 4.693511  | 0.849721  | -3.047545 |
| H  | 3.912422  | -0.683203 | -2.677320 |
| H  | 2.970705  | 0.815492  | -2.667660 |
| H  | 6.812553  | 0.976728  | -1.036189 |
| H  | 6.599129  | 0.272238  | 0.568728  |
| H  | 6.486144  | -0.746236 | -0.875230 |
| C  | 4.648840  | 3.390512  | -0.929585 |
| H  | 4.441527  | 4.402418  | -0.562973 |
| H  | 5.735602  | 3.286290  | -0.997859 |

|   |          |           |           |
|---|----------|-----------|-----------|
| H | 4.239771 | 3.320108  | -1.941311 |
| C | 4.603813 | 2.548823  | 1.426799  |
| H | 4.196796 | 1.825247  | 2.138470  |
| H | 5.693087 | 2.456598  | 1.438448  |
| H | 4.356073 | 3.550450  | 1.797401  |
| C | 2.507129 | 2.569920  | 0.067640  |
| H | 2.287005 | 3.586404  | 0.414696  |
| H | 2.041889 | 2.452649  | -0.914868 |
| H | 2.026150 | 1.872227  | 0.757605  |
| C | 3.712777 | -2.514957 | 1.550026  |
| C | 5.206171 | -2.691396 | 1.238617  |
| C | 3.560688 | -1.784346 | 2.896119  |
| C | 3.073323 | -3.900544 | 1.670321  |
| H | 5.354575 | -3.167632 | 0.265789  |
| H | 5.733381 | -1.739095 | 1.242090  |
| H | 5.663936 | -3.329355 | 1.998837  |
| H | 2.506865 | -1.660916 | 3.159921  |
| H | 4.041316 | -2.366965 | 3.686075  |
| H | 4.025017 | -0.798128 | 2.867252  |
| H | 3.571443 | -4.452422 | 2.470647  |
| H | 2.011466 | -3.841854 | 1.918686  |
| H | 3.181374 | -4.481843 | 0.751797  |

#### TS-AD\_tBu\_1d

SMD(DCE)-CAM-B3LYP/6-311+G(d,p)

E = -2553.233375

Zero-point correction = 0.638778 (Hartree/Particle)

Thermal correction to Energy = 0.679986

Thermal correction to Enthalpy = 0.680930

Thermal correction to Gibbs Free Energy = 0.561552

Sum of electronic and zero-point Energies = -2552.594719

Sum of electronic and thermal Energies = -2552.553511

Sum of electronic and thermal Enthalpies = -2552.552567

Sum of electronic and thermal Free Energies = -2552.671946

|   |           |           |           |
|---|-----------|-----------|-----------|
| C | 0.250216  | 0.459558  | -0.203877 |
| H | -0.290632 | -0.251347 | 0.405752  |
| H | 0.136591  | 1.500439  | 0.069307  |
| C | 1.456783  | 0.068933  | -0.746614 |
| S | 2.623863  | 1.290516  | -1.262666 |
| O | 3.714226  | 0.619344  | -1.967511 |
| O | 1.893607  | 2.374007  | -1.922216 |
| S | 1.796888  | -1.657255 | -0.964711 |
| O | 0.689700  | -2.349603 | -0.297573 |
| O | 2.046707  | -1.959586 | -2.373104 |
| C | 3.296469  | 1.973767  | 0.248764  |
| C | 4.422134  | 1.388121  | 0.812511  |
| C | 2.685297  | 3.080840  | 0.822876  |
| C | 4.939316  | 1.922967  | 1.983842  |
| H | 4.892732  | 0.536926  | 0.337685  |
| C | 3.210921  | 3.603742  | 1.995719  |
| H | 1.825229  | 3.537337  | 0.350543  |
| C | 4.333404  | 3.024697  | 2.575452  |
| H | 5.820831  | 1.480049  | 2.431108  |

|    |           |           |           |
|----|-----------|-----------|-----------|
| H  | 2.747062  | 4.469928  | 2.451695  |
| H  | 4.742540  | 3.439045  | 3.489267  |
| C  | 3.287938  | -2.018899 | -0.053610 |
| C  | 3.216104  | -2.119686 | 1.330375  |
| C  | 4.473909  | -2.223050 | -0.742892 |
| C  | 4.367615  | -2.428361 | 2.038110  |
| H  | 2.275847  | -1.967460 | 1.845441  |
| C  | 5.618832  | -2.534456 | -0.022219 |
| H  | 4.494772  | -2.136652 | -1.820446 |
| C  | 5.565483  | -2.634844 | 1.362457  |
| H  | 4.328177  | -2.513438 | 3.117194  |
| H  | 6.552796  | -2.699591 | -0.545462 |
| H  | 6.462358  | -2.878651 | 1.919772  |
| C  | -1.327391 | 0.429760  | -1.632223 |
| C  | -2.133257 | 1.512579  | -1.184993 |
| C  | -0.664503 | 0.529232  | -2.970421 |
| H  | -1.631057 | -0.566775 | -1.340786 |
| H  | -1.876109 | 2.489290  | -1.573468 |
| C  | -3.143317 | 1.457555  | -0.269339 |
| H  | -0.212814 | 1.510032  | -3.123601 |
| H  | 0.104592  | -0.232288 | -3.104943 |
| H  | -1.418546 | 0.375256  | -3.751417 |
| O  | -3.542740 | 0.294803  | 0.274754  |
| Si | -4.389082 | -1.137868 | -0.065643 |
| C  | -3.967470 | -1.779743 | -1.769520 |
| C  | -6.229119 | -0.817077 | -0.011570 |
| C  | -3.857479 | -2.320079 | 1.316888  |
| H  | -4.706388 | -2.535981 | -2.052290 |
| H  | -4.021034 | -0.982791 | -2.516598 |
| H  | -2.980832 | -2.241891 | -1.834021 |
| H  | -6.758439 | -1.770101 | -0.112253 |
| H  | -6.554643 | -0.353394 | 0.921372  |
| H  | -6.548039 | -0.180769 | -0.840948 |
| C  | -4.369244 | -3.731198 | 0.984533  |
| H  | -4.098170 | -4.423975 | 1.789457  |
| H  | -5.458042 | -3.763544 | 0.881583  |
| H  | -3.932054 | -4.118253 | 0.060085  |
| C  | -4.453231 | -1.875524 | 2.660377  |
| H  | -4.133389 | -0.866335 | 2.934972  |
| H  | -5.546328 | -1.891051 | 2.649927  |
| H  | -4.123494 | -2.552590 | 3.457126  |
| C  | -2.328690 | -2.356044 | 1.434771  |
| H  | -2.030551 | -3.079712 | 2.202818  |
| H  | -1.841508 | -2.653863 | 0.503447  |
| H  | -1.926747 | -1.382600 | 1.726105  |
| C  | -3.838247 | 2.688569  | 0.297767  |
| C  | -5.342562 | 2.627183  | -0.006023 |
| C  | -3.630808 | 2.693647  | 1.822656  |
| C  | -3.278603 | 3.992218  | -0.277274 |
| H  | -5.527645 | 2.574782  | -1.082222 |
| H  | -5.814128 | 1.768646  | 0.468728  |
| H  | -5.828575 | 3.528581  | 0.375750  |
| H  | -2.569027 | 2.758435  | 2.075395  |

|   |           |          |           |
|---|-----------|----------|-----------|
| H | -4.136187 | 3.558877 | 2.259119  |
| H | -4.037707 | 1.792133 | 2.281683  |
| H | -3.799341 | 4.834956 | 0.182955  |
| H | -2.212581 | 4.107553 | -0.069667 |
| H | -3.429397 | 4.060618 | -1.357072 |

**TS-AD\_tBu\_2a**

SMD(DCE)-CAM-B3LYP/6-311+G(d,p)

E = -2553.233131  
 Zero-point correction = 0.638673 (Hartree/Particle)  
 Thermal correction to Energy = 0.679926  
 Thermal correction to Enthalpy = 0.680871  
 Thermal correction to Gibbs Free Energy = 0.561481  
 Sum of electronic and zero-point Energies = -2552.594458  
 Sum of electronic and thermal Energies = -2552.553204  
 Sum of electronic and thermal Enthalpies = -2552.552260  
 Sum of electronic and thermal Free Energies = -2552.671650

|   |           |           |           |
|---|-----------|-----------|-----------|
| C | -0.281165 | -0.053656 | -0.904917 |
| H | -0.138671 | -0.535771 | -1.863917 |
| H | 0.418699  | 0.724196  | -0.635429 |
| C | -1.573279 | 0.048403  | -0.439198 |
| S | -1.950127 | 1.201747  | 0.851153  |
| O | -2.921894 | 0.613276  | 1.775863  |
| O | -0.657673 | 1.641917  | 1.381206  |
| S | -2.904796 | -0.760921 | -1.279190 |
| O | -4.054475 | 0.144568  | -1.232630 |
| O | -2.383721 | -1.184726 | -2.580966 |
| C | -2.721801 | 2.626206  | 0.093841  |
| C | -4.046357 | 2.914269  | 0.380419  |
| C | -1.959115 | 3.435905  | -0.737574 |
| C | -4.619398 | 4.048623  | -0.178110 |
| H | -4.616016 | 2.260134  | 1.026397  |
| C | -2.545248 | 4.561382  | -1.296058 |
| H | -0.923647 | 3.196650  | -0.945946 |
| C | -3.872552 | 4.867122  | -1.015492 |
| H | -5.653204 | 4.288627  | 0.038701  |
| H | -1.963820 | 5.202002  | -1.947863 |
| H | -4.326050 | 5.748687  | -1.452972 |
| C | -3.378793 | -2.255709 | -0.411696 |
| C | -4.029569 | -2.165002 | 0.812449  |
| C | -3.141883 | -3.479071 | -1.022292 |
| C | -4.435083 | -3.332895 | 1.440920  |
| H | -4.202925 | -1.200624 | 1.269918  |
| C | -3.559612 | -4.639553 | -0.385234 |
| H | -2.645787 | -3.519252 | -1.982558 |
| C | -4.200241 | -4.566862 | 0.844824  |
| H | -4.940211 | -3.277235 | 2.397580  |
| H | -3.384879 | -5.600386 | -0.854020 |
| H | -4.523049 | -5.475098 | 1.340061  |
| C | 0.994019  | -1.526867 | 0.004491  |
| C | 1.388609  | -0.964365 | 1.242887  |
| C | 0.150215  | -2.762294 | -0.006501 |
| H | 1.682996  | -1.425280 | -0.823758 |

|    |           |           |           |
|----|-----------|-----------|-----------|
| H  | 0.740759  | -1.148747 | 2.088912  |
| C  | 2.468215  | -0.155112 | 1.450397  |
| H  | -0.665781 | -2.698230 | 0.715765  |
| H  | -0.264719 | -2.963728 | -0.994057 |
| H  | 0.766293  | -3.626187 | 0.271184  |
| O  | 3.322711  | 0.139616  | 0.452545  |
| Si | 4.573766  | -0.546083 | -0.466516 |
| C  | 4.333838  | -2.394509 | -0.607456 |
| C  | 6.210629  | -0.217807 | 0.373425  |
| C  | 4.493392  | 0.343225  | -2.140224 |
| H  | 5.266568  | -2.852218 | -0.951101 |
| H  | 4.099556  | -2.831916 | 0.367449  |
| H  | 3.545409  | -2.682170 | -1.305066 |
| H  | 7.027783  | -0.460788 | -0.313051 |
| H  | 6.326144  | 0.826356  | 0.671846  |
| H  | 6.335969  | -0.843065 | 1.260671  |
| C  | 5.497619  | -0.317187 | -3.098996 |
| H  | 5.482534  | 0.199130  | -4.065662 |
| H  | 6.523170  | -0.269696 | -2.721989 |
| H  | 5.256382  | -1.367396 | -3.286500 |
| C  | 4.863336  | 1.823856  | -1.969254 |
| H  | 4.181015  | 2.338441  | -1.287091 |
| H  | 5.879933  | 1.950420  | -1.587630 |
| H  | 4.810080  | 2.336708  | -2.936712 |
| C  | 3.088874  | 0.248974  | -2.749482 |
| H  | 3.073991  | 0.740163  | -3.729443 |
| H  | 2.773849  | -0.787444 | -2.901763 |
| H  | 2.343486  | 0.742762  | -2.122383 |
| C  | 2.756353  | 0.560628  | 2.761441  |
| C  | 4.125253  | 0.122345  | 3.303650  |
| C  | 2.780124  | 2.074527  | 2.485128  |
| C  | 1.691634  | 0.274832  | 3.823405  |
| H  | 4.162613  | -0.959292 | 3.460418  |
| H  | 4.934001  | 0.402895  | 2.630714  |
| H  | 4.308920  | 0.607990  | 4.265436  |
| H  | 1.810804  | 2.416274  | 2.115134  |
| H  | 3.001857  | 2.611810  | 3.410908  |
| H  | 3.543691  | 2.331767  | 1.750056  |
| H  | 1.935473  | 0.834463  | 4.729484  |
| H  | 0.700350  | 0.587613  | 3.491053  |
| H  | 1.654828  | -0.784262 | 4.090122  |

### TS-AD\_tBu\_2b

SMD(DCE)-CAM-B3LYP/6-311+G(d,p)

E = -2553.234706

Zero-point correction = 0.638815 (Hartree/Particle)

Thermal correction to Energy = 0.680168

Thermal correction to Enthalpy = 0.681112

Thermal correction to Gibbs Free Energy = 0.561151

Sum of electronic and zero-point Energies = -2552.595891

Sum of electronic and thermal Energies = -2552.554538

Sum of electronic and thermal Enthalpies = -2552.553594

Sum of electronic and thermal Free Energies = -2552.673555



|    |           |           |           |
|----|-----------|-----------|-----------|
| C  | -0.301024 | -0.457803 | -0.131401 |
| H  | 0.032954  | -1.399616 | 0.283038  |
| H  | 0.230328  | -0.096470 | -0.999969 |
| C  | -1.646991 | -0.172890 | -0.039641 |
| S  | -2.377819 | 1.046869  | -1.087163 |
| O  | -1.416904 | 1.302914  | -2.162550 |
| O  | -3.728415 | 0.597175  | -1.426544 |
| S  | -2.679477 | -1.119518 | 1.040085  |
| O  | -1.767880 | -1.868874 | 1.909630  |
| O  | -3.685486 | -0.250991 | 1.652469  |
| C  | -2.533872 | 2.571607  | -0.165216 |
| C  | -1.583089 | 3.565880  | -0.352910 |
| C  | -3.611389 | 2.744524  | 0.694424  |
| C  | -1.713222 | 4.759007  | 0.344412  |
| H  | -0.766053 | 3.412465  | -1.044708 |
| C  | -3.727466 | 3.940654  | 1.386571  |
| H  | -4.338182 | 1.954911  | 0.824072  |
| C  | -2.780066 | 4.943658  | 1.214563  |
| H  | -0.982159 | 5.545760  | 0.202652  |
| H  | -4.562364 | 4.089892  | 2.060418  |
| H  | -2.878378 | 5.876539  | 1.757108  |
| C  | -3.539875 | -2.317569 | 0.030650  |
| C  | -2.860922 | -3.458620 | -0.377827 |
| C  | -4.866982 | -2.097291 | -0.304992 |
| C  | -3.532717 | -4.397677 | -1.145744 |
| H  | -1.828702 | -3.617607 | -0.092828 |
| C  | -5.530001 | -3.048357 | -1.067872 |
| H  | -5.367371 | -1.197402 | 0.024285  |
| C  | -4.864218 | -4.192318 | -1.489480 |
| H  | -3.017164 | -5.293306 | -1.470327 |
| H  | -6.568275 | -2.892347 | -1.334330 |
| H  | -5.385865 | -4.930318 | -2.087424 |
| C  | 0.922126  | 0.597072  | 1.249853  |
| C  | 1.623189  | 1.530372  | 0.440320  |
| C  | 0.001025  | 1.100586  | 2.317625  |
| H  | 1.453895  | -0.313515 | 1.493199  |
| H  | 1.216453  | 2.530285  | 0.373556  |
| C  | 2.738741  | 1.248659  | -0.294347 |
| H  | -0.648671 | 1.898338  | 1.953902  |
| H  | -0.615027 | 0.301316  | 2.728470  |
| H  | 0.597830  | 1.511192  | 3.140629  |
| O  | 3.228371  | -0.003608 | -0.306692 |
| Si | 4.432120  | -0.988702 | 0.372815  |
| C  | 4.763483  | -0.369995 | 2.102240  |
| C  | 5.983498  | -0.906301 | -0.667475 |
| C  | 3.742209  | -2.760160 | 0.332631  |
| H  | 5.474267  | -1.026371 | 2.613287  |
| H  | 5.199891  | 0.632468  | 2.080843  |
| H  | 3.853712  | -0.328074 | 2.705401  |
| H  | 6.768443  | -1.505904 | -0.197095 |
| H  | 5.822567  | -1.303344 | -1.673011 |
| H  | 6.368429  | 0.110047  | -0.764210 |
| C  | 4.908139  | -3.742937 | 0.540162  |

|   |          |           |           |
|---|----------|-----------|-----------|
| H | 4.523434 | -4.768584 | 0.571475  |
| H | 5.638964 | -3.692499 | -0.270175 |
| H | 5.436956 | -3.567088 | 1.482263  |
| C | 3.091180 | -3.043228 | -1.028796 |
| H | 2.236059 | -2.388845 | -1.213488 |
| H | 3.795127 | -2.912960 | -1.855895 |
| H | 2.733745 | -4.079037 | -1.064320 |
| C | 2.711837 | -2.998794 | 1.444735  |
| H | 2.363734 | -4.037698 | 1.410170  |
| H | 3.133690 | -2.829414 | 2.439052  |
| H | 1.830794 | -2.362434 | 1.340194  |
| C | 3.458641 | 2.268712  | -1.167607 |
| C | 4.737646 | 2.734824  | -0.448932 |
| C | 3.820634 | 1.623709  | -2.513856 |
| C | 2.590813 | 3.501534  | -1.442428 |
| H | 4.495397 | 3.231929  | 0.493476  |
| H | 5.417115 | 1.910366  | -0.234637 |
| H | 5.274015 | 3.447721  | -1.080745 |
| H | 2.923717 | 1.284086  | -3.038532 |
| H | 4.323287 | 2.359512  | -3.146132 |
| H | 4.486223 | 0.770342  | -2.392245 |
| H | 3.135062 | 4.176732  | -2.106780 |
| H | 1.653310 | 3.232184  | -1.934014 |
| H | 2.360396 | 4.056885  | -0.531256 |

### TS-AD\_tBu\_2c

SMD(DCE)-CAM-B3LYP/6-311+G(d,p)

E = -2553.233127

Zero-point correction = 0.638682 (Hartree/Particle)

Thermal correction to Energy = 0.679970

Thermal correction to Enthalpy = 0.680915

Thermal correction to Gibbs Free Energy = 0.561170

Sum of electronic and zero-point Energies = -2552.594445

Sum of electronic and thermal Energies = -2552.553157

Sum of electronic and thermal Enthalpies = -2552.552212

Sum of electronic and thermal Free Energies = -2552.671957

|   |           |           |           |
|---|-----------|-----------|-----------|
| C | 0.051153  | 0.287696  | 0.128668  |
| H | -0.213456 | 1.333728  | 0.207302  |
| H | -0.396331 | -0.266304 | -0.683889 |
| C | 1.318166  | -0.075027 | 0.535854  |
| S | 1.873660  | -1.729997 | 0.220969  |
| O | 1.922759  | -2.492732 | 1.468496  |
| O | 1.016432  | -2.232333 | -0.857272 |
| S | 2.312200  | 1.051620  | 1.459213  |
| O | 1.410187  | 2.077059  | 1.990848  |
| O | 3.175246  | 0.313005  | 2.379464  |
| C | 3.537220  | -1.623180 | -0.413765 |
| C | 4.597724  | -1.989075 | 0.401740  |
| C | 3.727074  | -1.230690 | -1.733491 |
| C | 5.882949  | -1.960790 | -0.122439 |
| H | 4.415546  | -2.294186 | 1.423204  |
| C | 5.015796  | -1.203083 | -2.242711 |
| H | 2.882688  | -0.961253 | -2.355474 |

|    |           |           |           |
|----|-----------|-----------|-----------|
| C  | 6.090021  | -1.569096 | -1.438639 |
| H  | 6.721917  | -2.247683 | 0.499752  |
| H  | 5.180884  | -0.902081 | -3.269963 |
| H  | 7.095259  | -1.550206 | -1.842947 |
| C  | 3.376700  | 1.863349  | 0.270091  |
| C  | 2.806436  | 2.598859  | -0.762424 |
| C  | 4.749823  | 1.786871  | 0.438939  |
| C  | 3.638075  | 3.268283  | -1.645343 |
| H  | 1.730805  | 2.650209  | -0.878712 |
| C  | 5.572742  | 2.468565  | -0.449413 |
| H  | 5.165080  | 1.206741  | 1.252122  |
| C  | 5.019330  | 3.203977  | -1.487835 |
| H  | 3.208097  | 3.844035  | -2.455876 |
| H  | 6.647900  | 2.420497  | -0.326942 |
| H  | 5.665071  | 3.731629  | -2.179795 |
| C  | -1.475295 | -0.261982 | 1.499960  |
| C  | -2.054575 | -1.428562 | 0.927669  |
| C  | -0.781616 | -0.377060 | 2.822658  |
| H  | -1.992471 | 0.672509  | 1.327155  |
| H  | -1.612226 | -2.375149 | 1.207443  |
| C  | -3.067607 | -1.460951 | 0.015795  |
| H  | -0.102221 | -1.231617 | 2.847642  |
| H  | -0.222934 | 0.525511  | 3.067549  |
| H  | -1.532269 | -0.528029 | 3.607411  |
| O  | -3.676408 | -0.333109 | -0.399543 |
| Si | -4.777820 | 0.841144  | 0.140388  |
| C  | -4.683272 | 1.011864  | 1.999214  |
| C  | -6.512674 | 0.325550  | -0.325276 |
| C  | -4.290626 | 2.428844  | -0.776414 |
| H  | -5.571579 | 1.542858  | 2.354855  |
| H  | -4.679534 | 0.030079  | 2.481527  |
| H  | -3.806523 | 1.561579  | 2.345761  |
| H  | -7.193977 | 1.168857  | -0.174571 |
| H  | -6.591994 | 0.016414  | -1.369657 |
| H  | -6.868050 | -0.494873 | 0.302669  |
| C  | -5.124427 | 3.593995  | -0.218767 |
| H  | -4.878509 | 4.517404  | -0.755556 |
| H  | -6.199098 | 3.427284  | -0.335274 |
| H  | -4.924483 | 3.770182  | 0.841930  |
| C  | -4.575068 | 2.282151  | -2.278387 |
| H  | -4.012356 | 1.455578  | -2.721188 |
| H  | -5.636133 | 2.112979  | -2.479779 |
| H  | -4.283550 | 3.198117  | -2.805604 |
| C  | -2.802258 | 2.742928  | -0.580904 |
| H  | -2.550322 | 3.684389  | -1.083067 |
| H  | -2.539752 | 2.857542  | 0.474786  |
| H  | -2.169052 | 1.961617  | -1.006331 |
| C  | -3.537185 | -2.725836 | -0.688422 |
| C  | -5.034954 | -2.943316 | -0.426911 |
| C  | -3.309392 | -2.542505 | -2.199396 |
| C  | -2.774375 | -3.968745 | -0.223585 |
| H  | -5.244309 | -3.017786 | 0.643775  |
| H  | -5.637021 | -2.137151 | -0.842548 |

|   |           |           |           |
|---|-----------|-----------|-----------|
| H | -5.355586 | -3.875887 | -0.897966 |
| H | -2.247436 | -2.411543 | -2.422972 |
| H | -3.661087 | -3.428634 | -2.733987 |
| H | -3.851307 | -1.675872 | -2.579941 |
| H | -3.141929 | -4.837197 | -0.774972 |
| H | -1.702371 | -3.884890 | -0.411654 |
| H | -2.924714 | -4.164696 | 0.840722  |

### TS-AD\_tBu\_2d

SMD(DCE)-CAM-B3LYP/6-311+G(d,p)

E = -2553.233387

Zero-point correction = 0.638784 (Hartree/Particle)

Thermal correction to Energy = 0.680046

Thermal correction to Enthalpy = 0.680990

Thermal correction to Gibbs Free Energy = 0.561578

Sum of electronic and zero-point Energies = -2552.594602

Sum of electronic and thermal Energies = -2552.553341

Sum of electronic and thermal Enthalpies = -2552.552397

Sum of electronic and thermal Free Energies = -2552.671809

|   |           |           |           |
|---|-----------|-----------|-----------|
| C | 0.418635  | -0.369952 | -0.149695 |
| H | 0.163493  | -1.347138 | 0.237490  |
| H | -0.033610 | 0.474569  | 0.353193  |
| C | 1.668272  | -0.219348 | -0.703756 |
| S | 2.306994  | 1.388689  | -1.058433 |
| O | 3.729357  | 1.251506  | -1.371521 |
| O | 1.433130  | 2.058370  | -2.023776 |
| S | 2.616391  | -1.650960 | -1.145030 |
| O | 1.764132  | -2.795533 | -0.806638 |
| O | 3.119683  | -1.536629 | -2.511841 |
| C | 2.165536  | 2.281665  | 0.485554  |
| C | 3.011330  | 1.941556  | 1.534413  |
| C | 1.240251  | 3.307654  | 0.596454  |
| C | 2.919851  | 2.648573  | 2.722714  |
| H | 3.733533  | 1.141615  | 1.424286  |
| C | 1.160937  | 4.011354  | 1.792000  |
| H | 0.601793  | 3.555508  | -0.241528 |
| C | 1.995684  | 3.680943  | 2.850634  |
| H | 3.573484  | 2.396993  | 3.548943  |
| H | 0.446380  | 4.819283  | 1.892285  |
| H | 1.930457  | 4.232267  | 3.781167  |
| C | 4.020070  | -1.695984 | -0.041343 |
| C | 3.832168  | -2.157039 | 1.256134  |
| C | 5.265894  | -1.301142 | -0.504625 |
| C | 4.923673  | -2.216581 | 2.109150  |
| H | 2.852142  | -2.473214 | 1.590936  |
| C | 6.351317  | -1.370577 | 0.358211  |
| H | 5.377390  | -0.944431 | -1.519039 |
| C | 6.180059  | -1.824001 | 1.660064  |
| H | 4.794561  | -2.576992 | 3.122448  |
| H | 7.331850  | -1.068847 | 0.010573  |
| H | 7.031005  | -1.875210 | 2.329153  |
| C | -1.164378 | -0.501187 | -1.603179 |
| C | -1.826762 | 0.750530  | -1.493690 |

|    |           |           |           |
|----|-----------|-----------|-----------|
| C  | -0.464776 | -0.841337 | -2.881724 |
| H  | -1.606255 | -1.336070 | -1.076061 |
| H  | -1.441282 | 1.554489  | -2.105804 |
| C  | -2.864365 | 1.041681  | -0.656644 |
| H  | 0.158051  | -0.015307 | -3.229321 |
| H  | 0.149861  | -1.735933 | -2.786454 |
| H  | -1.214540 | -1.040936 | -3.656608 |
| O  | -3.398724 | 0.106909  | 0.151594  |
| Si | -4.400727 | -1.263456 | 0.119037  |
| C  | -4.251641 | -2.137125 | -1.526193 |
| C  | -6.177852 | -0.737135 | 0.361029  |
| C  | -3.819970 | -2.328037 | 1.577572  |
| H  | -5.093258 | -2.827100 | -1.641385 |
| H  | -4.303191 | -1.424166 | -2.354232 |
| H  | -3.331884 | -2.714729 | -1.633587 |
| H  | -6.790376 | -1.617623 | 0.579248  |
| H  | -6.298552 | -0.035101 | 1.188863  |
| H  | -6.584681 | -0.275598 | -0.541880 |
| C  | -4.562571 | -3.673461 | 1.529689  |
| H  | -4.263154 | -4.293756 | 2.382224  |
| H  | -5.647974 | -3.550012 | 1.583401  |
| H  | -4.332612 | -4.235875 | 0.620367  |
| C  | -4.138409 | -1.626159 | 2.905828  |
| H  | -3.637021 | -0.657565 | 2.985643  |
| H  | -5.211381 | -1.461600 | 3.035547  |
| H  | -3.797735 | -2.242853 | 3.745795  |
| C  | -2.310672 | -2.590026 | 1.502803  |
| H  | -2.002936 | -3.237880 | 2.331981  |
| H  | -2.023671 | -3.093097 | 0.574791  |
| H  | -1.738350 | -1.663106 | 1.579066  |
| C  | -3.460461 | 2.432904  | -0.492553 |
| C  | -4.938265 | 2.413229  | -0.913479 |
| C  | -3.363704 | 2.831936  | 0.989972  |
| C  | -2.729631 | 3.481786  | -1.334390 |
| H  | -5.050568 | 2.082285  | -1.949447 |
| H  | -5.529829 | 1.759472  | -0.274773 |
| H  | -5.353890 | 3.421004  | -0.834726 |
| H  | -2.322582 | 2.871410  | 1.321171  |
| H  | -3.802006 | 3.822863  | 1.132953  |
| H  | -3.898399 | 2.126733  | 1.626869  |
| H  | -3.181307 | 4.459965  | -1.154322 |
| H  | -1.671101 | 3.550825  | -1.074637 |
| H  | -2.807780 | 3.274273  | -2.403967 |

### TS-AD\_Mes\_1a

SMD(DCE)-CAM-B3LYP/6-311+G(d,p)

E = -2744.925309

Zero-point correction = 0.690118 (Hartree/Particle)

Thermal correction to Energy = 0.735605

Thermal correction to Enthalpy = 0.736549

Thermal correction to Gibbs Free Energy = 0.607942

Sum of electronic and zero-point Energies = -2744.235263

Sum of electronic and thermal Energies = -2744.189776  
 Sum of electronic and thermal Enthalpies = -2744.188832  
 Sum of electronic and thermal Free Energies = -2744.317439

|    |           |           |           |
|----|-----------|-----------|-----------|
| C  | -0.928913 | -0.707348 | 0.022983  |
| H  | -0.348428 | -0.238135 | 0.806160  |
| H  | -0.638364 | -1.709369 | -0.260049 |
| C  | -2.273258 | -0.403202 | -0.055355 |
| S  | -3.378299 | -1.482514 | -0.920124 |
| O  | -4.346637 | -0.690858 | -1.679561 |
| O  | -2.530365 | -2.441702 | -1.632437 |
| S  | -2.918322 | 1.030437  | 0.745748  |
| O  | -4.272413 | 0.724491  | 1.207424  |
| O  | -1.907675 | 1.451287  | 1.717710  |
| C  | -4.280841 | -2.399264 | 0.319921  |
| C  | -5.586914 | -2.040319 | 0.615835  |
| C  | -3.654253 | -3.467925 | 0.948550  |
| C  | -6.282631 | -2.775272 | 1.565209  |
| H  | -6.045909 | -1.200685 | 0.112908  |
| C  | -4.358340 | -4.189678 | 1.900264  |
| H  | -2.638065 | -3.739489 | 0.692513  |
| C  | -5.669294 | -3.843471 | 2.207290  |
| H  | -7.305046 | -2.509587 | 1.804691  |
| H  | -3.883982 | -5.026896 | 2.397448  |
| H  | -6.216343 | -4.411539 | 2.950420  |
| C  | -3.044525 | 2.333074  | -0.472587 |
| C  | -4.195352 | 2.430517  | -1.244497 |
| C  | -1.993958 | 3.230105  | -0.610224 |
| C  | -4.287066 | 3.450229  | -2.179560 |
| H  | -4.998429 | 1.718514  | -1.116548 |
| C  | -2.099602 | 4.245705  | -1.550318 |
| H  | -1.117064 | 3.148226  | 0.018865  |
| C  | -3.241109 | 4.352796  | -2.334304 |
| H  | -5.179174 | 3.541341  | -2.787163 |
| H  | -1.290785 | 4.957129  | -1.664706 |
| H  | -3.319921 | 5.147583  | -3.066761 |
| C  | 0.208168  | 0.246726  | -1.465414 |
| C  | 1.389819  | -0.542883 | -1.469417 |
| C  | -0.655211 | 0.248736  | -2.689540 |
| H  | 0.263440  | 1.185935  | -0.925056 |
| H  | 1.446789  | -1.364398 | -2.175631 |
| C  | 2.446665  | -0.391957 | -0.622717 |
| H  | -0.805758 | -0.759676 | -3.078157 |
| H  | -1.629923 | 0.700286  | -2.503154 |
| H  | -0.167609 | 0.839920  | -3.473253 |
| O  | 2.404537  | 0.545960  | 0.341343  |
| Si | 3.495297  | 1.764613  | 0.838494  |
| C  | 3.733313  | 2.913173  | -0.613969 |
| C  | 5.148188  | 1.047700  | 1.331497  |
| C  | 2.616701  | 2.585215  | 2.300289  |
| H  | 4.363156  | 3.763462  | -0.336971 |
| H  | 4.234185  | 2.389449  | -1.432960 |
| H  | 2.787330  | 3.307474  | -0.992385 |
| H  | 5.809033  | 1.857947  | 1.654803  |

|   |          |           |           |
|---|----------|-----------|-----------|
| H | 5.077653 | 0.327920  | 2.149050  |
| H | 5.631946 | 0.554238  | 0.485620  |
| C | 3.498544 | 3.733343  | 2.821867  |
| H | 3.008061 | 4.219751  | 3.673020  |
| H | 4.475485 | 3.382698  | 3.166079  |
| H | 3.663440 | 4.501450  | 2.060404  |
| C | 2.398727 | 1.565969  | 3.427739  |
| H | 1.759361 | 0.739873  | 3.106424  |
| H | 3.340652 | 1.147506  | 3.792093  |
| H | 1.904404 | 2.050616  | 4.277924  |
| C | 1.258347 | 3.154220  | 1.871374  |
| H | 0.771597 | 3.643337  | 2.723804  |
| H | 1.358147 | 3.904942  | 1.081557  |
| H | 0.581982 | 2.371912  | 1.522221  |
| C | 3.637800 | -1.282615 | -0.682209 |
| C | 3.926016 | -2.119254 | 0.411880  |
| C | 4.455657 | -1.310263 | -1.822477 |
| C | 5.029470 | -2.960374 | 0.345893  |
| C | 5.558407 | -2.163111 | -1.838375 |
| C | 5.865846 | -2.990939 | -0.766619 |
| H | 5.238200 | -3.616570 | 1.184881  |
| H | 6.193254 | -2.176997 | -2.718424 |
| C | 3.059887 | -2.146840 | 1.643470  |
| H | 3.297616 | -1.319610 | 2.315881  |
| H | 1.998740 | -2.069498 | 1.398323  |
| H | 3.215176 | -3.075775 | 2.194290  |
| C | 4.188938 | -0.461397 | -3.039776 |
| H | 3.460283 | -0.939264 | -3.701442 |
| H | 3.793766 | 0.521827  | -2.783938 |
| H | 5.107540 | -0.325560 | -3.613110 |
| C | 7.073404 | -3.886884 | -0.797249 |
| H | 7.927017 | -3.406776 | -0.308568 |
| H | 6.883824 | -4.824740 | -0.271110 |
| H | 7.369139 | -4.120611 | -1.821444 |

### TS-AD\_Mes\_1b

SMD(DCE)-CAM-B3LYP/6-311+G(d,p)

E = -2744.923295

Zero-point correction = 0.689934 (Hartree/Particle)

Thermal correction to Energy = 0.735546

Thermal correction to Enthalpy = 0.736490

Thermal correction to Gibbs Free Energy = 0.607124

Sum of electronic and zero-point Energies = -2744.233329

Sum of electronic and thermal Energies = -2744.187718

Sum of electronic and thermal Enthalpies = -2744.186774

Sum of electronic and thermal Free Energies = -2744.316140

|   |           |           |          |
|---|-----------|-----------|----------|
| C | -0.848381 | -0.278433 | 0.548225 |
| H | -0.250831 | 0.616852  | 0.438420 |
| H | -0.521090 | -0.979954 | 1.303784 |
| C | -2.210521 | -0.195934 | 0.331834 |
| S | -3.317821 | -1.298598 | 1.164638 |
| O | -2.515257 | -2.001835 | 2.168167 |
| O | -4.471053 | -0.507503 | 1.597669 |

|    |           |           |           |
|----|-----------|-----------|-----------|
| S  | -2.868349 | 1.122928  | -0.644276 |
| O  | -1.738186 | 1.639924  | -1.420019 |
| O  | -4.058265 | 0.648591  | -1.351913 |
| C  | -3.924377 | -2.546055 | 0.034965  |
| C  | -3.336960 | -3.803948 | 0.053528  |
| C  | -4.999796 | -2.254851 | -0.794394 |
| C  | -3.833011 | -4.788630 | -0.789144 |
| H  | -2.515182 | -4.011276 | 0.725871  |
| C  | -5.484398 | -3.247966 | -1.632565 |
| H  | -5.443407 | -1.269499 | -0.786614 |
| C  | -4.901266 | -4.509872 | -1.632265 |
| H  | -3.386684 | -5.775596 | -0.781428 |
| H  | -6.323220 | -3.035170 | -2.284113 |
| H  | -5.286492 | -5.281756 | -2.288111 |
| C  | -3.383113 | 2.426116  | 0.464741  |
| C  | -2.434900 | 3.337492  | 0.911738  |
| C  | -4.715540 | 2.512459  | 0.841767  |
| C  | -2.836721 | 4.358509  | 1.760324  |
| H  | -1.404493 | 3.261938  | 0.589015  |
| C  | -5.104812 | 3.542023  | 1.686431  |
| H  | -5.430524 | 1.786688  | 0.480688  |
| C  | -4.168121 | 4.459328  | 2.146846  |
| H  | -2.109733 | 5.079235  | 2.114324  |
| H  | -6.142537 | 3.625751  | 1.985552  |
| H  | -4.477932 | 5.260277  | 2.807749  |
| C  | 0.189163  | -1.100190 | -1.083983 |
| C  | 1.390039  | -1.553001 | -0.469155 |
| C  | -0.715376 | -2.106159 | -1.721201 |
| H  | 0.229562  | -0.137069 | -1.578652 |
| H  | 1.451099  | -2.596629 | -0.178475 |
| C  | 2.458905  | -0.767254 | -0.163564 |
| H  | -0.821552 | -3.002572 | -1.108359 |
| H  | -1.705644 | -1.695520 | -1.921635 |
| H  | -0.289729 | -2.411366 | -2.684340 |
| O  | 2.419702  | 0.560398  | -0.394124 |
| Si | 3.193003  | 1.573032  | -1.528580 |
| C  | 2.393276  | 1.258381  | -3.186140 |
| C  | 5.014107  | 1.173286  | -1.614543 |
| C  | 2.873617  | 3.330449  | -0.895337 |
| H  | 2.922666  | 1.799581  | -3.975941 |
| H  | 2.431754  | 0.195290  | -3.440870 |
| H  | 1.346839  | 1.571571  | -3.208106 |
| H  | 5.516142  | 1.893605  | -2.268463 |
| H  | 5.498892  | 1.216262  | -0.637331 |
| H  | 5.184267  | 0.179688  | -2.036112 |
| C  | 3.141241  | 4.321613  | -2.040041 |
| H  | 3.010923  | 5.348158  | -1.678867 |
| H  | 4.161426  | 4.242347  | -2.428336 |
| H  | 2.451817  | 4.178685  | -2.876065 |
| C  | 3.810248  | 3.661931  | 0.275085  |
| H  | 3.683982  | 2.970627  | 1.112602  |
| H  | 4.861645  | 3.637639  | -0.022960 |
| H  | 3.598384  | 4.670741  | 0.648099  |



|   |          |           |           |
|---|----------|-----------|-----------|
| C | 1.417401 | 3.480176  | -0.434298 |
| H | 1.226744 | 4.517471  | -0.134427 |
| H | 0.704321 | 3.229934  | -1.224225 |
| H | 1.203235 | 2.840342  | 0.424701  |
| C | 3.675080 | -1.300740 | 0.511657  |
| C | 3.953199 | -0.903471 | 1.832674  |
| C | 4.526696 | -2.196331 | -0.147555 |
| C | 5.084887 | -1.404458 | 2.462344  |
| C | 3.032393 | 0.018562  | 2.587320  |
| C | 5.657647 | -2.666644 | 0.520512  |
| C | 4.264176 | -2.673775 | -1.552724 |
| C | 5.955268 | -2.283567 | 1.820891  |
| H | 5.289434 | -1.107111 | 3.486286  |
| H | 3.074179 | 1.037255  | 2.198028  |
| H | 1.992597 | -0.309676 | 2.514091  |
| H | 3.303394 | 0.048154  | 3.643271  |
| H | 6.322326 | -3.351118 | 0.003230  |
| H | 3.521989 | -3.476571 | -1.565727 |
| H | 3.886383 | -1.878916 | -2.196755 |
| H | 5.179725 | -3.066658 | -1.997490 |
| C | 7.181333 | -2.795151 | 2.525983  |
| H | 7.897438 | -1.987681 | 2.703006  |
| H | 6.926867 | -3.219192 | 3.500465  |
| H | 7.683858 | -3.566453 | 1.940556  |

### TS-AD\_Mes\_1c

#### SMD(DCE)-CAM-B3LYP/6-311+G(d,p)

E = -2744.921583

Zero-point correction = 0.689538 (Hartree/Particle)

Thermal correction to Energy = 0.735394

Thermal correction to Enthalpy = 0.736338

Thermal correction to Gibbs Free Energy = 0.604515

Sum of electronic and zero-point Energies = -2744.232028

Sum of electronic and thermal Energies = -2744.186172

Sum of electronic and thermal Enthalpies = -2744.185228

Sum of electronic and thermal Free Energies = -2744.317050

|   |           |           |           |
|---|-----------|-----------|-----------|
| C | -0.893491 | -0.746724 | -0.121799 |
| H | -0.382206 | 0.117284  | 0.282490  |
| H | -0.659525 | -1.698422 | 0.335141  |
| C | -2.162764 | -0.588379 | -0.634690 |
| S | -3.185776 | -2.017347 | -0.895255 |
| O | -3.579839 | -2.134595 | -2.297038 |
| O | -2.451596 | -3.131265 | -0.287021 |
| S | -2.735756 | 1.018930  | -1.091799 |
| O | -1.612081 | 1.725012  | -1.710465 |
| O | -3.991769 | 0.873334  | -1.824357 |
| C | -4.666897 | -1.758969 | 0.066361  |
| C | -5.854907 | -1.465665 | -0.585809 |
| C | -4.601928 | -1.896749 | 1.447614  |
| C | -7.008688 | -1.305157 | 0.169543  |
| H | -5.870020 | -1.365529 | -1.662426 |
| C | -5.760535 | -1.729755 | 2.190342  |
| H | -3.664502 | -2.135663 | 1.934590  |

|    |           |           |           |
|----|-----------|-----------|-----------|
| C  | -6.960632 | -1.435635 | 1.551710  |
| H  | -7.945507 | -1.079431 | -0.325205 |
| H  | -5.727695 | -1.835583 | 3.267793  |
| H  | -7.864510 | -1.309541 | 2.136116  |
| C  | -3.104855 | 1.865923  | 0.440011  |
| C  | -2.098611 | 2.574507  | 1.083532  |
| C  | -4.394976 | 1.804984  | 0.949589  |
| C  | -2.394286 | 3.230461  | 2.269651  |
| H  | -1.106661 | 2.629152  | 0.655385  |
| C  | -4.677997 | 2.468985  | 2.134859  |
| H  | -5.166455 | 1.259219  | 0.422232  |
| C  | -3.680180 | 3.176130  | 2.794416  |
| H  | -1.620260 | 3.791599  | 2.778956  |
| H  | -5.682030 | 2.436631  | 2.539916  |
| H  | -3.907285 | 3.694605  | 3.718461  |
| C  | 0.558142  | -0.899498 | -1.670775 |
| C  | 1.663361  | -1.469081 | -0.980868 |
| C  | -0.102718 | -1.694387 | -2.752103 |
| H  | 0.573370  | 0.173662  | -1.820708 |
| H  | 1.736553  | -2.551489 | -0.953709 |
| C  | 2.630732  | -0.778424 | -0.317198 |
| H  | -0.249271 | -2.737102 | -2.462334 |
| H  | -1.064494 | -1.271023 | -3.041648 |
| H  | 0.537020  | -1.686775 | -3.642510 |
| O  | 2.594425  | 0.569289  | -0.238289 |
| Si | 3.500200  | 1.780576  | -1.029206 |
| C  | 2.897350  | 1.866602  | -2.794623 |
| C  | 5.317540  | 1.352696  | -0.998870 |
| C  | 3.130932  | 3.371570  | -0.067919 |
| H  | 3.517911  | 2.553408  | -3.377903 |
| H  | 2.962197  | 0.886496  | -3.275717 |
| H  | 1.862109  | 2.208651  | -2.864762 |
| H  | 5.894819  | 2.194046  | -1.395433 |
| H  | 5.683382  | 1.141968  | 0.007773  |
| H  | 5.534851  | 0.486802  | -1.628653 |
| C  | 3.596312  | 4.571719  | -0.909142 |
| H  | 3.434861  | 5.500650  | -0.350450 |
| H  | 4.662081  | 4.521250  | -1.152313 |
| H  | 3.041078  | 4.654130  | -1.847026 |
| C  | 3.881443  | 3.384010  | 1.271081  |
| H  | 3.613253  | 2.532629  | 1.902227  |
| H  | 4.965530  | 3.368304  | 1.132073  |
| H  | 3.635712  | 4.295528  | 1.828527  |
| C  | 1.625571  | 3.502442  | 0.195879  |
| H  | 1.415375  | 4.451598  | 0.702922  |
| H  | 1.042708  | 3.490622  | -0.729182 |
| H  | 1.259719  | 2.695662  | 0.834701  |
| C  | 3.735116  | -1.461256 | 0.413649  |
| C  | 3.794840  | -1.353773 | 1.815614  |
| C  | 4.697673  | -2.213057 | -0.273838 |
| C  | 4.824858  | -1.988251 | 2.498105  |
| C  | 2.745582  | -0.604039 | 2.592865  |
| C  | 5.720388  | -2.824027 | 0.451780  |

|   |          |           |           |
|---|----------|-----------|-----------|
| C | 4.671203 | -2.390700 | -1.770193 |
| C | 5.805326 | -2.721510 | 1.833425  |
| H | 4.858231 | -1.915025 | 3.580674  |
| H | 2.810960 | 0.471882  | 2.424384  |
| H | 1.738531 | -0.912975 | 2.300734  |
| H | 2.858573 | -0.787713 | 3.661996  |
| H | 6.471654 | -3.394237 | -0.085389 |
| H | 3.984708 | -3.190622 | -2.061232 |
| H | 4.350763 | -1.487493 | -2.289590 |
| H | 5.662527 | -2.662135 | -2.136313 |
| C | 6.931225 | -3.365191 | 2.595074  |
| H | 7.688042 | -2.624156 | 2.869525  |
| H | 6.573971 | -3.821104 | 3.520961  |
| H | 7.423755 | -4.136161 | 2.000399  |

### TS-AD\_Mes\_1d

SMD(DCE)-CAM-B3LYP/6-311+G(d,p)

E = -2744.921835

Zero-point correction = 0.689369 (Hartree/Particle)

Thermal correction to Energy = 0.735243

Thermal correction to Enthalpy = 0.736188

Thermal correction to Gibbs Free Energy = 0.604143

Sum of electronic and zero-point Energies = -2744.232373

Sum of electronic and thermal Energies = -2744.186499

Sum of electronic and thermal Enthalpies = -2744.185555

Sum of electronic and thermal Free Energies = -2744.317599

|   |          |           |           |
|---|----------|-----------|-----------|
| C | 0.669037 | -0.527898 | 0.276737  |
| H | 0.172890 | 0.201671  | -0.349221 |
| H | 0.396380 | -1.563479 | 0.126988  |
| C | 1.967261 | -0.270988 | 0.673161  |
| S | 3.003615 | -1.591773 | 1.218756  |
| O | 3.945108 | -1.096062 | 2.221246  |
| O | 2.121935 | -2.712937 | 1.550159  |
| S | 2.505289 | 1.415593  | 0.776086  |
| O | 1.557114 | 2.174379  | -0.046132 |
| O | 2.668052 | 1.813021  | 2.174313  |
| C | 3.965267 | -2.088484 | -0.207441 |
| C | 5.343661 | -1.950738 | -0.167587 |
| C | 3.317822 | -2.643306 | -1.305710 |
| C | 6.092483 | -2.382539 | -1.255387 |
| H | 5.820292 | -1.518044 | 0.701633  |
| C | 4.075601 | -3.064018 | -2.386633 |
| H | 2.240374 | -2.752101 | -1.319450 |
| C | 5.460976 | -2.934482 | -2.360851 |
| H | 7.171032 | -2.284662 | -1.235052 |
| H | 3.585205 | -3.499009 | -3.248969 |
| H | 6.048707 | -3.268222 | -3.207852 |
| C | 4.103634 | 1.512049  | -0.007877 |
| C | 4.169884 | 1.478451  | -1.395714 |
| C | 5.235255 | 1.675742  | 0.776891  |
| C | 5.406119 | 1.610349  | -2.007944 |
| H | 3.270543 | 1.361008  | -1.987256 |
| C | 6.466902 | 1.810903  | 0.150201  |

|    |           |           |           |
|----|-----------|-----------|-----------|
| H  | 5.148342  | 1.701238  | 1.854747  |
| C  | 6.550749  | 1.778301  | -1.235689 |
| H  | 5.475328  | 1.588990  | -3.088595 |
| H  | 7.360490  | 1.944823  | 0.747591  |
| H  | 7.514320  | 1.886372  | -1.719607 |
| C  | -0.694542 | -0.163647 | 1.836314  |
| C  | -1.826912 | -0.907680 | 1.402393  |
| C  | 0.001143  | -0.573416 | 3.096905  |
| H  | -0.725018 | 0.903131  | 1.642104  |
| H  | -1.928104 | -1.929309 | 1.753205  |
| C  | -2.775320 | -0.457068 | 0.535644  |
| H  | 0.173557  | -1.650103 | 3.133701  |
| H  | 0.955064  | -0.058445 | 3.217382  |
| H  | -0.625745 | -0.303067 | 3.954611  |
| O  | -2.662737 | 0.769728  | -0.010405 |
| Si | -3.663355 | 2.152645  | 0.017208  |
| C  | -3.706677 | 2.763265  | 1.781266  |
| C  | -5.387489 | 1.728129  | -0.561021 |
| C  | -2.811830 | 3.380886  | -1.147937 |
| H  | -4.285564 | 3.688889  | 1.855746  |
| H  | -4.179171 | 2.029514  | 2.440151  |
| H  | -2.704385 | 2.963334  | 2.166597  |
| H  | -6.018459 | 2.620839  | -0.513484 |
| H  | -5.405842 | 1.361775  | -1.590078 |
| H  | -5.848676 | 0.970034  | 0.075840  |
| C  | -3.770233 | 4.555356  | -1.407445 |
| H  | -3.277103 | 5.302569  | -2.039627 |
| H  | -4.679495 | 4.238206  | -1.924874 |
| H  | -4.068653 | 5.060256  | -0.483470 |
| C  | -2.473359 | 2.711127  | -2.486679 |
| H  | -1.759104 | 1.894396  | -2.360945 |
| H  | -3.361716 | 2.310342  | -2.983457 |
| H  | -2.023066 | 3.444184  | -3.166301 |
| C  | -1.522503 | 3.923603  | -0.515574 |
| H  | -1.038530 | 4.625727  | -1.204985 |
| H  | -1.721135 | 4.466149  | 0.412849  |
| H  | -0.799253 | 3.134640  | -0.296782 |
| C  | -3.916169 | -1.308846 | 0.094437  |
| C  | -3.990753 | -1.710457 | -1.251892 |
| C  | -4.899742 | -1.718990 | 1.004684  |
| C  | -5.050488 | -2.510094 | -1.659919 |
| C  | -2.939488 | -1.312031 | -2.253433 |
| C  | -5.950652 | -2.514686 | 0.548689  |
| C  | -4.873020 | -1.317064 | 2.456986  |
| C  | -6.045226 | -2.920926 | -0.775458 |
| H  | -5.097177 | -2.827019 | -2.697247 |
| H  | -3.032116 | -0.261814 | -2.536104 |
| H  | -1.932053 | -1.447044 | -1.852969 |
| H  | -3.028250 | -1.913132 | -3.159186 |
| H  | -6.717200 | -2.820136 | 1.253483  |
| H  | -4.140329 | -1.899447 | 3.021220  |
| H  | -4.614584 | -0.264810 | 2.585541  |
| H  | -5.849334 | -1.485207 | 2.913969  |

|   |           |           |           |
|---|-----------|-----------|-----------|
| C | -7.180751 | -3.786350 | -1.249033 |
| H | -7.734059 | -3.303308 | -2.058617 |
| H | -6.811949 | -4.740536 | -1.635052 |
| H | -7.881568 | -3.999113 | -0.440519 |

**TS-AD\_Mes\_2a**

SMD(DCE)-CAM-B3LYP/6-311+G(d,p)

not determined => converged to **TS-AD\_Mes\_1a**

**TS-AD\_Mes\_2b**

SMD(DCE)-CAM-B3LYP/6-311+G(d,p)

E = -2744.923877

Zero-point correction = 0.689909 (Hartree/Particle)

Thermal correction to Energy = 0.735663

Thermal correction to Enthalpy = 0.736607

Thermal correction to Gibbs Free Energy = 0.605375

Sum of electronic and zero-point Energies = -2744.233967

Sum of electronic and thermal Energies = -2744.188214

Sum of electronic and thermal Enthalpies = -2744.187270

Sum of electronic and thermal Free Energies = -2744.318502

|   |           |           |           |
|---|-----------|-----------|-----------|
| C | 1.080190  | 0.778376  | 0.241733  |
| H | 1.154460  | 1.758916  | 0.692808  |
| H | 0.323463  | 0.650886  | -0.518812 |
| C | 2.248426  | 0.057694  | 0.118239  |
| S | 2.346457  | -1.310416 | -0.993124 |
| O | 1.223690  | -1.176758 | -1.924451 |
| O | 3.710543  | -1.359680 | -1.520793 |
| S | 3.700911  | 0.568641  | 0.990323  |
| O | 3.262398  | 1.615954  | 1.917814  |
| O | 4.399121  | -0.599222 | 1.529266  |
| C | 2.071335  | -2.818282 | -0.071125 |
| C | 0.833714  | -3.440534 | -0.160780 |
| C | 3.107255  | -3.356908 | 0.682911  |
| C | 0.628716  | -4.628205 | 0.528729  |
| H | 0.051945  | -3.010997 | -0.772300 |
| C | 2.887022  | -4.541559 | 1.368753  |
| H | 4.061984  | -2.852608 | 0.738334  |
| C | 1.650933  | -5.174430 | 1.293641  |
| H | -0.330007 | -5.127948 | 0.461617  |
| H | 3.684953  | -4.973421 | 1.960529  |
| H | 1.486958  | -6.101935 | 1.829573  |
| C | 4.783459  | 1.344029  | -0.201997 |
| C | 4.442077  | 2.594271  | -0.701900 |
| C | 5.950520  | 0.699236  | -0.579723 |
| C | 5.295509  | 3.208675  | -1.605378 |
| H | 3.529059  | 3.085056  | -0.388532 |
| C | 6.800576  | 1.328599  | -1.478788 |
| H | 6.185756  | -0.276320 | -0.176894 |
| C | 6.472447  | 2.576733  | -1.992024 |
| H | 5.043254  | 4.183612  | -2.004290 |
| H | 7.718412  | 0.838840  | -1.780574 |
| H | 7.137474  | 3.061737  | -2.696828 |

|    |           |           |           |
|----|-----------|-----------|-----------|
| C  | -0.196986 | 0.130591  | 1.811617  |
| C  | -1.204013 | -0.639525 | 1.172873  |
| C  | 0.697915  | -0.526844 | 2.816201  |
| H  | -0.457846 | 1.163632  | 2.013433  |
| H  | -1.126535 | -1.720403 | 1.201687  |
| C  | -2.256747 | -0.113014 | 0.483161  |
| H  | 1.090406  | -1.476656 | 2.447164  |
| H  | 1.532981  | 0.115355  | 3.094438  |
| H  | 0.125685  | -0.738371 | 3.727036  |
| O  | -2.340517 | 1.219019  | 0.334429  |
| Si | -3.592376 | 2.381157  | 0.336450  |
| C  | -4.554240 | 2.194312  | 1.925405  |
| C  | -4.726569 | 2.165534  | -1.129461 |
| C  | -2.640596 | 4.017473  | 0.251431  |
| H  | -5.218199 | 3.052671  | 2.066225  |
| H  | -5.180604 | 1.299044  | 1.903914  |
| H  | -3.899183 | 2.131856  | 2.797558  |
| H  | -5.514078 | 2.924413  | -1.088423 |
| H  | -4.207265 | 2.276731  | -2.083590 |
| H  | -5.214635 | 1.188701  | -1.117490 |
| C  | -3.641017 | 5.176249  | 0.113797  |
| H  | -3.102918 | 6.130787  | 0.091049  |
| H  | -4.223352 | 5.108233  | -0.809046 |
| H  | -4.342369 | 5.218988  | 0.952365  |
| C  | -1.701388 | 4.021770  | -0.963050 |
| H  | -0.958593 | 3.222408  | -0.904667 |
| H  | -2.246848 | 3.905703  | -1.903901 |
| H  | -1.161073 | 4.974298  | -1.014583 |
| C  | -1.814632 | 4.221373  | 1.529316  |
| H  | -1.259072 | 5.164532  | 1.469766  |
| H  | -2.446069 | 4.269809  | 2.420806  |
| H  | -1.086330 | 3.419693  | 1.677171  |
| C  | -3.282397 | -0.968546 | -0.176746 |
| C  | -3.288977 | -1.070008 | -1.580269 |
| C  | -4.213515 | -1.683018 | 0.587275  |
| C  | -4.242473 | -1.873575 | -2.190918 |
| C  | -5.161758 | -2.467960 | -0.069903 |
| C  | -5.195057 | -2.574568 | -1.453358 |
| H  | -4.240086 | -1.959144 | -3.273090 |
| H  | -5.891024 | -3.011254 | 0.522640  |
| C  | -2.269171 | -0.350802 | -2.422795 |
| H  | -2.387781 | 0.732593  | -2.361609 |
| H  | -1.250018 | -0.583868 | -2.104045 |
| H  | -2.367411 | -0.639702 | -3.469895 |
| C  | -4.216532 | -1.648637 | 2.094030  |
| H  | -3.491088 | -2.358204 | 2.502367  |
| H  | -3.961080 | -0.665102 | 2.487703  |
| H  | -5.198796 | -1.927901 | 2.478383  |
| C  | -6.234948 | -3.411824 | -2.145841 |
| H  | -6.989511 | -2.779205 | -2.622622 |
| H  | -5.788248 | -4.028452 | -2.929102 |
| H  | -6.747728 | -4.069355 | -1.442215 |

**TS-AD\_Mes\_2c****SMD(DCE)-CAM-B3LYP/6-311+G(d,p)**

E = -2744.920545  
Zero-point correction = 0.689346 (Hartree/Particle)  
Thermal correction to Energy = 0.735291  
Thermal correction to Enthalpy = 0.736235  
Thermal correction to Gibbs Free Energy = 0.604145  
Sum of electronic and zero-point Energies = -2744.231199  
Sum of electronic and thermal Energies = -2744.185254  
Sum of electronic and thermal Enthalpies = -2744.184310  
Sum of electronic and thermal Free Energies = -2744.316400

|   |           |           |           |
|---|-----------|-----------|-----------|
| C | 0.724670  | 0.750792  | 0.443142  |
| H | 0.733879  | 1.826160  | 0.563409  |
| H | 0.060220  | 0.349320  | -0.308012 |
| C | 1.901159  | 0.078416  | 0.694279  |
| S | 1.977829  | -1.655501 | 0.328512  |
| O | 1.937272  | -2.435207 | 1.565747  |
| O | 0.926005  | -1.890744 | -0.666300 |
| S | 3.236033  | 0.894106  | 1.507750  |
| O | 2.684104  | 2.109189  | 2.112955  |
| O | 3.960853  | -0.057181 | 2.348859  |
| C | 3.547522  | -1.969331 | -0.457379 |
| C | 4.544648  | -2.616465 | 0.257175  |
| C | 3.712751  | -1.611531 | -1.790084 |
| C | 5.739821  | -2.912200 | -0.384235 |
| H | 4.381900  | -2.886098 | 1.291832  |
| C | 4.912538  | -1.908990 | -2.416906 |
| H | 2.914384  | -1.118969 | -2.330813 |
| C | 5.921980  | -2.559371 | -1.715059 |
| H | 6.527326  | -3.421302 | 0.157892  |
| H | 5.057005  | -1.639475 | -3.455929 |
| H | 6.856203  | -2.794246 | -2.211515 |
| C | 4.358374  | 1.421589  | 0.215968  |
| C | 3.905956  | 2.299137  | -0.762685 |
| C | 5.673544  | 0.987177  | 0.253736  |
| C | 4.797153  | 2.744625  | -1.725249 |
| H | 2.875513  | 2.632481  | -0.776695 |
| C | 6.559079  | 1.446791  | -0.713536 |
| H | 5.997311  | 0.304596  | 1.027985  |
| C | 6.122176  | 2.319730  | -1.699628 |
| H | 4.458564  | 3.427384  | -2.495000 |
| H | 7.590847  | 1.117725  | -0.693725 |
| H | 6.815588  | 2.673981  | -2.453195 |
| C | -0.720350 | 0.516428  | 1.991806  |
| C | -1.605973 | -0.487742 | 1.518496  |
| C | 0.070695  | 0.257358  | 3.236782  |
| H | -1.047886 | 1.538967  | 1.838954  |
| H | -1.466419 | -1.506765 | 1.862568  |
| C | -2.612905 | -0.269648 | 0.625748  |
| H | 0.559574  | -0.718695 | 3.206214  |
| H | 0.825821  | 1.024841  | 3.402844  |
| H | -0.604432 | 0.262219  | 4.100525  |
| O | -2.762403 | 0.955085  | 0.090890  |

|    |           |           |           |
|----|-----------|-----------|-----------|
| Si | -4.078511 | 1.957582  | -0.328169 |
| C  | -5.140506 | 2.185814  | 1.190145  |
| C  | -5.087977 | 1.217811  | -1.712599 |
| C  | -3.223854 | 3.562495  | -0.863808 |
| H  | -5.861902 | 2.992841  | 1.029590  |
| H  | -5.710262 | 1.279867  | 1.411380  |
| H  | -4.546666 | 2.438526  | 2.071759  |
| H  | -5.909962 | 1.896307  | -1.961356 |
| H  | -4.503544 | 1.055779  | -2.620719 |
| H  | -5.530456 | 0.264138  | -1.417476 |
| C  | -4.278694 | 4.543721  | -1.399458 |
| H  | -3.797887 | 5.485702  | -1.687162 |
| H  | -4.789018 | 4.154531  | -2.284614 |
| H  | -5.039231 | 4.783252  | -0.650418 |
| C  | -2.202510 | 3.273945  | -1.973213 |
| H  | -1.416345 | 2.595119  | -1.633669 |
| H  | -2.670819 | 2.831588  | -2.857151 |
| H  | -1.721773 | 4.206637  | -2.290981 |
| C  | -2.504150 | 4.206335  | 0.329593  |
| H  | -1.998688 | 5.125634  | 0.011403  |
| H  | -3.199652 | 4.475841  | 1.129188  |
| H  | -1.745748 | 3.543562  | 0.754506  |
| C  | -3.521908 | -1.357800 | 0.167677  |
| C  | -3.390616 | -1.853726 | -1.143147 |
| C  | -4.483012 | -1.895203 | 1.031699  |
| C  | -4.239542 | -2.866136 | -1.566880 |
| C  | -5.323442 | -2.904890 | 0.558989  |
| C  | -5.219756 | -3.401638 | -0.731996 |
| H  | -4.130994 | -3.253260 | -2.575371 |
| H  | -6.076463 | -3.311979 | 1.226163  |
| C  | -2.328678 | -1.330729 | -2.073344 |
| H  | -2.479000 | -0.274883 | -2.306257 |
| H  | -1.334966 | -1.429997 | -1.628678 |
| H  | -2.336401 | -1.886789 | -3.011615 |
| C  | -4.632886 | -1.438081 | 2.459944  |
| H  | -3.943597 | -1.978786 | 3.115084  |
| H  | -4.425000 | -0.375430 | 2.581592  |
| H  | -5.644996 | -1.633572 | 2.818061  |
| C  | -6.128800 | -4.493670 | -1.225221 |
| H  | -6.696940 | -4.167142 | -2.100326 |
| H  | -5.555035 | -5.375236 | -1.523507 |
| H  | -6.838390 | -4.797405 | -0.454310 |

### TS-AD\_Mes\_2d

SMD(DCE)-CAM-B3LYP/6-311+G(d,p)

E = -2744.919603

Zero-point correction = 0.689533 (Hartree/Particle)

Thermal correction to Energy = 0.735496

Thermal correction to Enthalpy = 0.736440

Thermal correction to Gibbs Free Energy = 0.604813

Sum of electronic and zero-point Energies = -2744.230070

Sum of electronic and thermal Energies = -2744.184108

Sum of electronic and thermal Enthalpies = -2744.183163



Sum of electronic and thermal Free Energies = -2744.314790

|    |           |           |           |
|----|-----------|-----------|-----------|
| C  | -0.873964 | 0.838754  | -0.519111 |
| H  | -0.933004 | 1.918163  | -0.473955 |
| H  | -0.189090 | 0.361447  | 0.166981  |
| C  | -2.015074 | 0.164433  | -0.892781 |
| S  | -2.174819 | -1.561045 | -0.561074 |
| O  | -3.235095 | -2.112726 | -1.402375 |
| O  | -0.829888 | -2.136219 | -0.617552 |
| S  | -3.324764 | 1.048366  | -1.702029 |
| O  | -2.942666 | 2.462805  | -1.622299 |
| O  | -3.605568 | 0.485920  | -3.020660 |
| C  | -2.728679 | -1.698299 | 1.136821  |
| C  | -4.039183 | -2.075289 | 1.388415  |
| C  | -1.831497 | -1.449104 | 2.169189  |
| C  | -4.459714 | -2.204723 | 2.705935  |
| H  | -4.714204 | -2.272586 | 0.566670  |
| C  | -2.265260 | -1.575610 | 3.479476  |
| H  | -0.806071 | -1.175007 | 1.957276  |
| C  | -3.577396 | -1.952325 | 3.747244  |
| H  | -5.479312 | -2.504821 | 2.914934  |
| H  | -1.575556 | -1.387514 | 4.293317  |
| H  | -3.909903 | -2.053953 | 4.773550  |
| C  | -4.787389 | 0.830270  | -0.701546 |
| C  | -4.885001 | 1.515500  | 0.503546  |
| C  | -5.813547 | 0.024361  | -1.170779 |
| C  | -6.041903 | 1.383138  | 1.255183  |
| H  | -4.075354 | 2.148317  | 0.845270  |
| C  | -6.969010 | -0.096147 | -0.409985 |
| H  | -5.706092 | -0.493101 | -2.114433 |
| C  | -7.081532 | 0.580042  | 0.797792  |
| H  | -6.134894 | 1.912292  | 2.195662  |
| H  | -7.781599 | -0.718431 | -0.764737 |
| H  | -7.985913 | 0.483767  | 1.386994  |
| C  | 0.631570  | 0.984383  | -2.041364 |
| C  | 1.544642  | -0.068168 | -1.781258 |
| C  | -0.128172 | 0.986131  | -3.330961 |
| H  | 0.914558  | 1.956252  | -1.652043 |
| H  | 1.458346  | -0.984260 | -2.354248 |
| C  | 2.523707  | -0.023689 | -0.832974 |
| H  | -0.587862 | 0.015790  | -3.528707 |
| H  | -0.902986 | 1.752136  | -3.347094 |
| H  | 0.560577  | 1.198850  | -4.157015 |
| O  | 2.598500  | 1.043373  | -0.018364 |
| Si | 3.832520  | 1.904854  | 0.788229  |
| C  | 5.090153  | 2.462040  | -0.473262 |
| C  | 4.652651  | 0.854584  | 2.095055  |
| C  | 2.888750  | 3.359194  | 1.555064  |
| H  | 5.778175  | 3.183935  | -0.022689 |
| H  | 5.689144  | 1.621388  | -0.831416 |
| H  | 4.622545  | 2.940685  | -1.336789 |
| H  | 5.415120  | 1.449512  | 2.607294  |
| H  | 3.948956  | 0.495284  | 2.849012  |
| H  | 5.154320  | -0.010517 | 1.656719  |

|   |          |           |           |
|---|----------|-----------|-----------|
| C | 3.850757 | 4.179631  | 2.429030  |
| H | 3.324513 | 5.042851  | 2.852299  |
| H | 4.244394 | 3.595603  | 3.265333  |
| H | 4.700633 | 4.565393  | 1.858326  |
| C | 1.737099 | 2.843883  | 2.429620  |
| H | 1.009964 | 2.273260  | 1.846514  |
| H | 2.093565 | 2.204864  | 3.242673  |
| H | 1.206910 | 3.687965  | 2.886017  |
| C | 2.319390 | 4.264635  | 0.453889  |
| H | 1.760613 | 5.094402  | 0.902255  |
| H | 3.108231 | 4.699295  | -0.166151 |
| H | 1.634593 | 3.723935  | -0.204593 |
| C | 3.485778 | -1.143996 | -0.628738 |
| C | 3.318787 | -1.999913 | 0.475037  |
| C | 4.532269 | -1.355764 | -1.533321 |
| C | 4.223068 | -3.034793 | 0.667122  |
| C | 5.425243 | -2.402323 | -1.295743 |
| C | 5.291474 | -3.247363 | -0.203510 |
| H | 4.089728 | -3.698057 | 1.516130  |
| H | 6.244017 | -2.557636 | -1.991007 |
| C | 2.155642 | -1.832936 | 1.416048  |
| H | 2.154330 | -0.848432 | 1.887781  |
| H | 1.209577 | -1.942668 | 0.879469  |
| H | 2.187317 | -2.585620 | 2.204891  |
| C | 4.711880 | -0.512258 | -2.768991 |
| H | 4.088240 | -0.887134 | -3.585943 |
| H | 4.437308 | 0.529429  | -2.606827 |
| H | 5.748665 | -0.545799 | -3.107512 |
| C | 6.264742 | -4.367471 | 0.042564  |
| H | 6.805782 | -4.217028 | 0.980897  |
| H | 5.747392 | -5.327280 | 0.118710  |
| H | 6.998437 | -4.440126 | -0.761604 |

### TS-AD\_Ph\_1a

SMD(DCE)-CAM-B3LYP/6-311+G(d,p)

E = -2627.023676

Zero-point correction = 0.607680 (Hartree/Particle)

Thermal correction to Energy = 0.647991

Thermal correction to Enthalpy = 0.648936

Thermal correction to Gibbs Free Energy = 0.530769

Sum of electronic and zero-point Energies = -2626.415996

Sum of electronic and thermal Energies = -2626.375685

Sum of electronic and thermal Enthalpies = -2626.374740

Sum of electronic and thermal Free Energies = -2626.492907

|   |           |           |           |
|---|-----------|-----------|-----------|
| C | -0.653987 | -0.833935 | -0.033454 |
| H | 0.035517  | -0.513669 | 0.736341  |
| H | -0.548786 | -1.850991 | -0.384893 |
| C | -1.927545 | -0.305153 | -0.027930 |
| S | -3.233155 | -1.134766 | -0.887613 |
| O | -4.105347 | -0.149662 | -1.527286 |
| O | -2.585989 | -2.154481 | -1.716457 |
| S | -2.286964 | 1.165428  | 0.881560  |

|    |           |           |           |
|----|-----------|-----------|-----------|
| O  | -3.643302 | 1.049866  | 1.416961  |
| O  | -1.165658 | 1.365385  | 1.801999  |
| C  | -4.195580 | -1.995580 | 0.347097  |
| C  | -5.435929 | -1.497774 | 0.714804  |
| C  | -3.682558 | -3.164339 | 0.895656  |
| C  | -6.183001 | -2.194571 | 1.654684  |
| H  | -5.806304 | -0.583004 | 0.272849  |
| C  | -4.435622 | -3.846984 | 1.838382  |
| H  | -2.715895 | -3.541071 | 0.586033  |
| C  | -5.683221 | -3.362620 | 2.216112  |
| H  | -7.156133 | -1.821357 | 1.949731  |
| H  | -4.049747 | -4.760527 | 2.274031  |
| H  | -6.269109 | -3.900827 | 2.951842  |
| C  | -2.270517 | 2.538831  | -0.262132 |
| C  | -3.429816 | 2.864587  | -0.953894 |
| C  | -1.095919 | 3.261902  | -0.422607 |
| C  | -3.403235 | 3.938499  | -1.831356 |
| H  | -4.331138 | 2.285385  | -0.810261 |
| C  | -1.083373 | 4.333467  | -1.304098 |
| H  | -0.214681 | 3.002983  | 0.149098  |
| C  | -2.233091 | 4.667422  | -2.009297 |
| H  | -4.299948 | 4.206099  | -2.376914 |
| H  | -0.175689 | 4.909984  | -1.435298 |
| H  | -2.219459 | 5.505008  | -2.696763 |
| C  | 0.549985  | 0.007186  | -1.537283 |
| C  | 1.579926  | -0.963903 | -1.604762 |
| C  | -0.345074 | 0.204007  | -2.720996 |
| H  | 0.763476  | 0.896449  | -0.955069 |
| H  | 1.455165  | -1.775558 | -2.312394 |
| C  | 2.658516  | -1.023259 | -0.766065 |
| H  | -0.662452 | -0.746984 | -3.151292 |
| H  | -1.232415 | 0.785591  | -2.468320 |
| H  | 0.197861  | 0.759118  | -3.494660 |
| O  | 2.816590  | -0.100275 | 0.204015  |
| C  | 3.630998  | -2.132317 | -0.791586 |
| Si | 3.871020  | 1.241120  | 0.308732  |
| C  | 3.888678  | -2.854347 | -1.962494 |
| C  | 4.306957  | -2.488975 | 0.378906  |
| C  | 3.336876  | 2.480780  | -0.981838 |
| C  | 5.625358  | 0.707209  | -0.042811 |
| C  | 3.650239  | 1.873783  | 2.078728  |
| C  | 4.789233  | -3.907624 | -1.956552 |
| H  | 3.397324  | -2.579833 | -2.887710 |
| C  | 5.201765  | -3.548526 | 0.383016  |
| H  | 4.113872  | -1.941069 | 1.291900  |
| H  | 3.955254  | 3.381839  | -0.925167 |
| H  | 3.455980  | 2.069017  | -1.988336 |
| H  | 2.294642  | 2.783821  | -0.863519 |
| H  | 6.266744  | 1.591403  | -0.108800 |
| H  | 6.035327  | 0.053749  | 0.729755  |
| H  | 5.697660  | 0.183786  | -0.999760 |
| C  | 5.448594  | -4.260558 | -0.784109 |
| H  | 4.984268  | -4.450511 | -2.874038 |

|   |          |           |           |
|---|----------|-----------|-----------|
| H | 5.709206 | -3.818676 | 1.301802  |
| H | 6.152869 | -5.084227 | -0.782168 |
| C | 4.735542 | 2.925926  | 2.360570  |
| H | 4.599978 | 3.338769  | 3.366635  |
| H | 5.742286 | 2.502338  | 2.313977  |
| H | 4.692082 | 3.763828  | 1.658107  |
| C | 3.797639 | 0.721074  | 3.081886  |
| H | 3.012919 | -0.028450 | 2.955255  |
| H | 4.764944 | 0.217863  | 2.993099  |
| H | 3.724036 | 1.107262  | 4.105206  |
| C | 2.270829 | 2.523472  | 2.255504  |
| H | 2.151956 | 2.868106  | 3.289413  |
| H | 2.147507 | 3.396015  | 1.607980  |
| H | 1.452155 | 1.829325  | 2.050573  |

### TS-AD\_Ph\_1b

SMD(DCE)-CAM-B3LYP/6-311+G(d,p)

E = -2627.016119

Zero-point correction = 0.607439 (Hartree/Particle)

Thermal correction to Energy = 0.647875

Thermal correction to Enthalpy = 0.648819

Thermal correction to Gibbs Free Energy = 0.529235

Sum of electronic and zero-point Energies = -2626.414650

Sum of electronic and thermal Energies = -2626.374214

Sum of electronic and thermal Enthalpies = -2626.373270

Sum of electronic and thermal Free Energies = -2626.492854

|   |           |           |           |
|---|-----------|-----------|-----------|
| C | 0.479918  | -0.231964 | -0.600187 |
| H | -0.174549 | 0.625568  | -0.524133 |
| H | 0.212976  | -0.974089 | -1.339610 |
| C | 1.821121  | -0.068139 | -0.332647 |
| S | 3.017205  | -1.144875 | -1.069511 |
| O | 2.300334  | -1.918200 | -2.086536 |
| O | 4.157158  | -0.319316 | -1.472048 |
| S | 2.365756  | 1.330561  | 0.600945  |
| O | 1.181514  | 1.812192  | 1.316423  |
| O | 3.558723  | 0.968015  | 1.366835  |
| C | 3.613944  | -2.325031 | 0.135853  |
| C | 3.105593  | -3.616645 | 0.110568  |
| C | 4.605292  | -1.948268 | 1.032846  |
| C | 3.595488  | -4.548575 | 1.014800  |
| H | 2.349673  | -3.889559 | -0.613617 |
| C | 5.083681  | -2.888992 | 1.932716  |
| H | 4.987564  | -0.937364 | 1.030312  |
| C | 4.578948  | -4.184305 | 1.925565  |
| H | 3.210858  | -5.561165 | 1.002500  |
| H | 5.856156  | -2.609261 | 2.638703  |
| H | 4.959286  | -4.914847 | 2.629852  |
| C | 2.832917  | 2.609037  | -0.557256 |
| C | 1.843638  | 3.435676  | -1.074447 |
| C | 4.167590  | 2.759738  | -0.904656 |
| C | 2.205660  | 4.436521  | -1.963938 |
| H | 0.811135  | 3.310675  | -0.774367 |
| C | 4.516498  | 3.768300  | -1.791432 |

|    |           |           |           |
|----|-----------|-----------|-----------|
| H  | 4.915005  | 2.098383  | -0.489381 |
| C  | 3.538784  | 4.601122  | -2.321680 |
| H  | 1.446087  | 5.091938  | -2.372329 |
| H  | 5.555076  | 3.901755  | -2.068719 |
| H  | 3.817573  | 5.385944  | -3.014966 |
| C  | -0.611003 | -1.091631 | 1.031882  |
| C  | -1.651279 | -1.761896 | 0.338690  |
| C  | 0.377739  | -1.896107 | 1.812826  |
| H  | -0.822600 | -0.111257 | 1.434680  |
| H  | -1.450135 | -2.784413 | 0.046838  |
| C  | -2.841366 | -1.227365 | -0.067619 |
| H  | 0.639017  | -2.824298 | 1.302439  |
| H  | 1.291940  | -1.338003 | 2.019001  |
| H  | -0.063525 | -2.163032 | 2.780573  |
| O  | -3.188082 | 0.034751  | 0.235254  |
| Si | -3.709072 | 1.047502  | 1.494480  |
| C  | -2.714600 | 0.759437  | 3.050476  |
| C  | -5.502542 | 0.705258  | 1.892096  |
| C  | -3.475764 | 2.791798  | 0.790962  |
| H  | -3.221837 | 1.250313  | 3.886927  |
| H  | -2.654910 | -0.305684 | 3.291297  |
| H  | -1.698981 | 1.155985  | 3.001943  |
| H  | -5.840213 | 1.422295  | 2.647396  |
| H  | -6.160434 | 0.800553  | 1.026571  |
| H  | -5.633311 | -0.294462 | 2.314335  |
| C  | -3.691948 | 3.813891  | 1.918691  |
| H  | -3.590788 | 4.831064  | 1.523211  |
| H  | -4.689130 | 3.735886  | 2.362205  |
| H  | -2.957025 | 3.701024  | 2.720349  |
| C  | -4.492996 | 3.058520  | -0.327711 |
| H  | -4.391500 | 2.344957  | -1.150154 |
| H  | -5.523239 | 3.010503  | 0.034812  |
| H  | -4.337987 | 4.061641  | -0.742029 |
| C  | -2.058241 | 2.958522  | 0.227480  |
| H  | -1.921293 | 3.985060  | -0.133012 |
| H  | -1.285599 | 2.768562  | 0.976619  |
| H  | -1.883448 | 2.285451  | -0.615522 |
| C  | -3.836556 | -1.957475 | -0.988562 |
| C  | -4.770295 | -1.233031 | -1.747189 |
| C  | -3.825129 | -3.359770 | -1.083530 |
| C  | -5.658332 | -1.893125 | -2.591719 |
| H  | -4.785056 | -0.149393 | -1.678693 |
| C  | -4.717643 | -4.014664 | -1.925376 |
| H  | -3.132493 | -3.940983 | -0.482447 |
| C  | -5.636767 | -3.285318 | -2.683642 |
| H  | -6.369125 | -1.319388 | -3.178811 |
| H  | -4.703524 | -5.098813 | -1.982654 |
| H  | -6.333274 | -3.800186 | -3.338356 |

### TS-AD\_Ph\_1c

SMD(DCE)-CAM-B3LYP/6-311+G(d,p)

E = -2627.021272

Zero-point correction = 0.607538 (Hartree/Particle)

Thermal correction to Energy = 0.647875  
 Thermal correction to Enthalpy = 0.648819  
 Thermal correction to Gibbs Free Energy = 0.530785  
 Sum of electronic and zero-point Energies = -2626.413729  
 Sum of electronic and thermal Energies = -2626.373392  
 Sum of electronic and thermal Enthalpies = -2626.372448  
 Sum of electronic and thermal Free Energies = -2626.490482

|    |           |           |           |
|----|-----------|-----------|-----------|
| C  | -0.589124 | -0.856389 | -0.034417 |
| H  | 0.013876  | -0.042973 | 0.348780  |
| H  | -0.485508 | -1.806979 | 0.470138  |
| C  | -1.812503 | -0.573534 | -0.597517 |
| S  | -2.992260 | -1.881695 | -0.828840 |
| O  | -3.370916 | -2.006716 | -2.234218 |
| O  | -2.406322 | -3.049247 | -0.162942 |
| S  | -2.181886 | 1.070366  | -1.128194 |
| O  | -0.973783 | 1.613407  | -1.751782 |
| O  | -3.435717 | 1.045341  | -1.878283 |
| C  | -4.448890 | -1.411433 | 0.089120  |
| C  | -5.578365 | -0.994506 | -0.598794 |
| C  | -4.427302 | -1.508529 | 1.475135  |
| C  | -6.717147 | -0.666687 | 0.124630  |
| H  | -5.560074 | -0.928587 | -1.677991 |
| C  | -5.569850 | -1.174341 | 2.185605  |
| H  | -3.536876 | -1.845783 | 1.990998  |
| C  | -6.711669 | -0.755449 | 1.510934  |
| H  | -7.608982 | -0.342792 | -0.397913 |
| H  | -5.570451 | -1.246743 | 3.266314  |
| H  | -7.603592 | -0.499391 | 2.070721  |
| C  | -2.468363 | 2.011698  | 0.365068  |
| C  | -1.391935 | 2.612109  | 1.004671  |
| C  | -3.763600 | 2.126677  | 0.851418  |
| C  | -1.622223 | 3.339119  | 2.163585  |
| H  | -0.394441 | 2.526766  | 0.594402  |
| C  | -3.980391 | 2.859492  | 2.009771  |
| H  | -4.587953 | 1.660725  | 0.327543  |
| C  | -2.912795 | 3.460744  | 2.665153  |
| H  | -0.792781 | 3.817497  | 2.670094  |
| H  | -4.986684 | 2.963427  | 2.396855  |
| H  | -3.088227 | 4.032627  | 3.568711  |
| C  | 0.876908  | -1.257256 | -1.524371 |
| C  | 1.865063  | -1.904926 | -0.746031 |
| C  | 0.161323  | -2.031877 | -2.585613 |
| H  | 1.016699  | -0.202894 | -1.728425 |
| H  | 1.786943  | -2.981337 | -0.645218 |
| C  | 2.853844  | -1.280291 | -0.034787 |
| H  | -0.095264 | -3.040136 | -2.253857 |
| H  | -0.746997 | -1.528029 | -2.916546 |
| H  | 0.815372  | -2.128450 | -3.460020 |
| O  | 2.968201  | 0.064867  | -0.052591 |
| Si | 3.996376  | 1.062674  | -0.986840 |
| C  | 3.342170  | 1.112754  | -2.734669 |
| C  | 5.714927  | 0.333340  | -0.993455 |
| C  | 3.919391  | 2.758120  | -0.145769 |

|   |          |           |           |
|---|----------|-----------|-----------|
| H | 4.034401 | 1.666800  | -3.375925 |
| H | 3.255673 | 0.104478  | -3.149089 |
| H | 2.363889 | 1.593234  | -2.806680 |
| H | 6.382142 | 0.968668  | -1.584407 |
| H | 6.141321 | 0.237316  | 0.006487  |
| H | 5.718516 | -0.656385 | -1.458767 |
| C | 4.589776 | 3.790658  | -1.067035 |
| H | 4.586750 | 4.774970  | -0.585260 |
| H | 5.632612 | 3.538679  | -1.282381 |
| H | 4.063862 | 3.892367  | -2.019921 |
| C | 4.660314 | 2.736231  | 1.198082  |
| H | 4.220268 | 2.019993  | 1.897011  |
| H | 5.718102 | 2.486391  | 1.079644  |
| H | 4.607796 | 3.725108  | 1.668355  |
| C | 2.460689 | 3.170450  | 0.091670  |
| H | 2.421866 | 4.169805  | 0.540809  |
| H | 1.886667 | 3.208368  | -0.838058 |
| H | 1.956456 | 2.480767  | 0.772536  |
| C | 3.781864 | -2.006427 | 0.853064  |
| C | 4.382339 | -1.338882 | 1.924780  |
| C | 4.072600 | -3.363009 | 0.663265  |
| C | 5.234729 | -2.009416 | 2.789548  |
| H | 4.165532 | -0.291454 | 2.085522  |
| C | 4.930394 | -4.028022 | 1.524327  |
| H | 3.643372 | -3.898598 | -0.173925 |
| C | 5.513390 | -3.355932 | 2.593313  |
| H | 5.682836 | -1.477535 | 3.620764  |
| H | 5.151305 | -5.075520 | 1.355860  |
| H | 6.183570 | -3.878695 | 3.265566  |

### TS-AD\_Ph\_1d

SMD(DCE)-CAM-B3LYP/6-311+G(d,p)

E = -2627.020448

Zero-point correction = 0.607252 (Hartree/Particle)

Thermal correction to Energy = 0.647830

Thermal correction to Enthalpy = 0.648774

Thermal correction to Gibbs Free Energy = 0.528865

Sum of electronic and zero-point Energies = -2626.413230

Sum of electronic and thermal Energies = -2626.372653

Sum of electronic and thermal Enthalpies = -2626.371708

Sum of electronic and thermal Free Energies = -2626.491617

|   |           |           |           |
|---|-----------|-----------|-----------|
| C | 0.322791  | 0.522799  | -0.257305 |
| H | -0.236485 | -0.217355 | 0.298221  |
| H | 0.104701  | 1.559870  | -0.046616 |
| C | 1.590806  | 0.211043  | -0.682969 |
| S | 2.704944  | 1.501475  | -1.149426 |
| O | 3.639298  | 1.001854  | -2.155921 |
| O | 1.886763  | 2.679013  | -1.445922 |
| S | 2.039304  | -1.496070 | -0.868837 |
| O | 1.010415  | -2.246300 | -0.142843 |
| O | 2.254180  | -1.817045 | -2.278987 |
| C | 3.660184  | 1.883630  | 0.315769  |
| C | 5.028987  | 1.667337  | 0.299832  |

|    |           |           |           |
|----|-----------|-----------|-----------|
| C  | 3.019283  | 2.428887  | 1.422524  |
| C  | 5.774566  | 2.008753  | 1.421510  |
| H  | 5.501438  | 1.244786  | -0.576688 |
| C  | 3.773351  | 2.759166  | 2.536871  |
| H  | 1.949732  | 2.599083  | 1.417438  |
| C  | 5.149184  | 2.550190  | 2.535610  |
| H  | 6.845841  | 1.848590  | 1.420644  |
| H  | 3.287822  | 3.185752  | 3.406133  |
| H  | 5.734305  | 2.813194  | 3.408939  |
| C  | 3.588004  | -1.723993 | -0.015182 |
| C  | 3.590777  | -1.735997 | 1.374671  |
| C  | 4.742725  | -1.936652 | -0.752994 |
| C  | 4.785859  | -1.966993 | 2.036984  |
| H  | 2.674510  | -1.576902 | 1.929654  |
| C  | 5.932280  | -2.171526 | -0.076328 |
| H  | 4.705247  | -1.923734 | -1.833992 |
| C  | 5.952691  | -2.186264 | 1.312069  |
| H  | 4.805521  | -1.981933 | 3.119836  |
| H  | 6.842613  | -2.344951 | -0.637184 |
| H  | 6.883519  | -2.371190 | 1.835279  |
| C  | -1.094920 | 0.356839  | -1.855097 |
| C  | -2.089656 | 1.248923  | -1.400291 |
| C  | -0.336898 | 0.673619  | -3.105554 |
| H  | -1.247170 | -0.695659 | -1.648120 |
| H  | -2.034367 | 2.273554  | -1.749565 |
| C  | -3.055326 | 0.950830  | -0.473445 |
| H  | -0.050804 | 1.725603  | -3.150655 |
| H  | 0.560020  | 0.060223  | -3.201712 |
| H  | -0.970207 | 0.458682  | -3.974166 |
| O  | -3.104951 | -0.276263 | 0.084256  |
| Si | -4.099205 | -1.627842 | -0.237791 |
| C  | -3.559992 | -2.381712 | -1.858258 |
| C  | -5.876455 | -1.074416 | -0.381071 |
| C  | -3.803203 | -2.782565 | 1.232727  |
| H  | -4.231393 | -3.201034 | -2.132340 |
| H  | -3.605406 | -1.644456 | -2.664808 |
| H  | -2.544045 | -2.780770 | -1.819372 |
| H  | -6.513691 | -1.935778 | -0.603837 |
| H  | -6.252606 | -0.605561 | 0.529720  |
| H  | -6.000931 | -0.362973 | -1.202370 |
| C  | -4.559709 | -4.098013 | 0.984438  |
| H  | -4.409440 | -4.778923 | 1.829978  |
| H  | -5.637521 | -3.942238 | 0.880019  |
| H  | -4.205156 | -4.611902 | 0.086648  |
| C  | -4.315990 | -2.146652 | 2.532259  |
| H  | -3.791688 | -1.215797 | 2.763651  |
| H  | -5.387171 | -1.930755 | 2.491106  |
| H  | -4.152296 | -2.831705 | 3.372363  |
| C  | -2.306018 | -3.085564 | 1.379775  |
| H  | -2.144011 | -3.767437 | 2.222861  |
| H  | -1.893475 | -3.564902 | 0.488441  |
| H  | -1.725862 | -2.179988 | 1.570877  |
| C  | -4.005363 | 1.951824  | 0.044629  |



|   |           |          |           |
|---|-----------|----------|-----------|
| C | -4.565857 | 1.786865 | 1.315389  |
| C | -4.358153 | 3.084627 | -0.699633 |
| C | -5.437531 | 2.733277 | 1.833368  |
| H | -4.302977 | 0.917307 | 1.902995  |
| C | -5.234299 | 4.024642 | -0.181568 |
| H | -3.964584 | 3.223116 | -1.698643 |
| C | -5.775787 | 3.855860 | 1.088291  |
| H | -5.853781 | 2.593561 | 2.824322  |
| H | -5.502309 | 4.890527 | -0.775702 |
| H | -6.460632 | 4.592763 | 1.491127  |

### TS-AD\_Ph\_2a

SMD(DCE)-CAM-B3LYP/6-311+G(d,p)

E = -2627.018954

Zero-point correction = 0.607372 (Hartree/Particle)

Thermal correction to Energy = 0.647905

Thermal correction to Enthalpy = 0.648849

Thermal correction to Gibbs Free Energy = 0.528182

Sum of electronic and zero-point Energies = -2626.411603

Sum of electronic and thermal Energies = -2626.371069

Sum of electronic and thermal Enthalpies = -2626.370125

Sum of electronic and thermal Free Energies = -2626.490792

|   |           |           |           |
|---|-----------|-----------|-----------|
| C | -0.556086 | -0.371610 | -0.698420 |
| H | -0.470737 | -1.082729 | -1.510454 |
| H | 0.218227  | 0.380131  | -0.640924 |
| C | -1.839850 | -0.011412 | -0.333442 |
| S | -2.097643 | 1.449281  | 0.631788  |
| O | -3.307094 | 1.288540  | 1.440278  |
| O | -0.824752 | 1.713558  | 1.304332  |
| S | -3.238260 | -0.825580 | -1.057697 |
| O | -4.202657 | 0.214803  | -1.420615 |
| O | -2.703901 | -1.699641 | -2.105357 |
| C | -2.379228 | 2.803228  | -0.500612 |
| C | -3.677040 | 3.215301  | -0.764879 |
| C | -1.280935 | 3.427347  | -1.078845 |
| C | -3.876133 | 4.279819  | -1.632430 |
| H | -4.512303 | 2.707940  | -0.302934 |
| C | -1.494166 | 4.485723  | -1.949474 |
| H | -0.275921 | 3.101905  | -0.842629 |
| C | -2.788907 | 4.910140  | -2.225115 |
| H | -4.883748 | 4.615087  | -1.846155 |
| H | -0.647620 | 4.983422  | -2.406544 |
| H | -2.950778 | 5.739224  | -2.903851 |
| C | -4.045110 | -1.897167 | 0.129997  |
| C | -4.878345 | -1.350554 | 1.097767  |
| C | -3.874579 | -3.269454 | 0.007206  |
| C | -5.537457 | -2.203179 | 1.970889  |
| H | -5.001215 | -0.279569 | 1.170588  |
| C | -4.543415 | -4.111197 | 0.884835  |
| H | -3.239208 | -3.670485 | -0.770896 |
| C | -5.368829 | -3.579066 | 1.866998  |
| H | -6.188724 | -1.789949 | 2.731486  |
| H | -4.421415 | -5.183853 | 0.796022  |

|    |           |           |           |
|----|-----------|-----------|-----------|
| H  | -5.888951 | -4.239582 | 2.550764  |
| C  | 0.460204  | -1.630707 | 0.631353  |
| C  | 1.219498  | -0.762874 | 1.456311  |
| C  | -0.600954 | -2.481036 | 1.258088  |
| H  | 0.995265  | -2.082477 | -0.195239 |
| H  | 0.789709  | -0.456985 | 2.401603  |
| C  | 2.416423  | -0.210048 | 1.095379  |
| H  | -1.270429 | -1.893225 | 1.889395  |
| H  | -1.192207 | -3.004216 | 0.508405  |
| H  | -0.131698 | -3.241381 | 1.892737  |
| O  | 2.923774  | -0.442496 | -0.131816 |
| C  | 3.152227  | 0.743582  | 1.945965  |
| Si | 4.167065  | -1.462016 | -0.701370 |
| C  | 3.019128  | 0.734745  | 3.339179  |
| C  | 3.992128  | 1.694661  | 1.359139  |
| C  | 3.650979  | -3.234328 | -0.416958 |
| C  | 5.746615  | -1.130195 | 0.236352  |
| C  | 4.291249  | -1.020411 | -2.537274 |
| C  | 3.700182  | 1.656655  | 4.117866  |
| H  | 2.395609  | -0.008578 | 3.819800  |
| C  | 4.666407  | 2.620740  | 2.140818  |
| H  | 4.101161  | 1.715063  | 0.282866  |
| H  | 4.463345  | -3.911223 | -0.698476 |
| H  | 3.437027  | -3.412532 | 0.641056  |
| H  | 2.766612  | -3.516872 | -0.992134 |
| H  | 6.521488  | -1.830112 | -0.091272 |
| H  | 6.125511  | -0.117183 | 0.090148  |
| H  | 5.605052  | -1.286453 | 1.309282  |
| C  | 4.524148  | 2.605562  | 3.522607  |
| H  | 3.591896  | 1.630925  | 5.195850  |
| H  | 5.304201  | 3.358869  | 1.668502  |
| H  | 5.054181  | 3.326805  | 4.133550  |
| C  | 4.657605  | 0.460808  | -2.705795 |
| H  | 4.742401  | 0.705997  | -3.770880 |
| H  | 3.896532  | 1.118349  | -2.277737 |
| H  | 5.616153  | 0.702200  | -2.238152 |
| C  | 5.384042  | -1.886019 | -3.184350 |
| H  | 5.162431  | -2.954441 | -3.107377 |
| H  | 5.466206  | -1.646843 | -4.250689 |
| H  | 6.366297  | -1.713289 | -2.735337 |
| C  | 2.954652  | -1.290026 | -3.242224 |
| H  | 3.035787  | -1.040706 | -4.306582 |
| H  | 2.659820  | -2.340991 | -3.176301 |
| H  | 2.145898  | -0.685539 | -2.823922 |

### TS-AD\_Ph\_2b

SMD(DCE)-CAM-B3LYP/6-311+G(d,p)

E = -2627.021894

Zero-point correction = 0.607328 (Hartree/Particle)

Thermal correction to Energy = 0.647910

Thermal correction to Enthalpy = 0.648854

Thermal correction to Gibbs Free Energy = 0.527285

Sum of electronic and zero-point Energies = -2626.414566

Sum of electronic and thermal Energies = -2626.373983  
Sum of electronic and thermal Enthalpies = -2626.373039  
Sum of electronic and thermal Free Energies = -2626.494609

|    |           |           |           |
|----|-----------|-----------|-----------|
| C  | -0.635474 | -0.759227 | 0.198764  |
| H  | -0.593000 | -1.734747 | 0.665401  |
| H  | 0.069514  | -0.579293 | -0.600752 |
| C  | -1.884089 | -0.177746 | 0.096418  |
| S  | -2.169501 | 1.138620  | -1.045843 |
| O  | -1.079455 | 1.093050  | -2.022144 |
| O  | -3.552343 | 1.031088  | -1.512075 |
| S  | -3.245631 | -0.833767 | 1.020023  |
| O  | -2.662560 | -1.787719 | 1.968091  |
| O  | -4.071105 | 0.257606  | 1.538726  |
| C  | -2.013026 | 2.692519  | -0.173538 |
| C  | -0.868582 | 3.454015  | -0.366731 |
| C  | -3.051594 | 3.127241  | 0.641734  |
| C  | -0.761164 | 4.678400  | 0.279651  |
| H  | -0.085539 | 3.100589  | -1.023911 |
| C  | -2.928571 | 4.349934  | 1.283599  |
| H  | -3.932696 | 2.515086  | 0.776926  |
| C  | -1.786096 | 5.122635  | 1.104531  |
| H  | 0.123136  | 5.286307  | 0.131470  |
| H  | -3.729603 | 4.701858  | 1.922278  |
| H  | -1.698410 | 6.079009  | 1.606499  |
| C  | -4.246039 | -1.778879 | -0.119697 |
| C  | -3.801176 | -3.034364 | -0.514148 |
| C  | -5.451317 | -1.257075 | -0.563054 |
| C  | -4.587168 | -3.780775 | -1.378766 |
| H  | -2.861870 | -3.427375 | -0.146010 |
| C  | -6.232495 | -2.017789 | -1.421719 |
| H  | -5.767214 | -0.274049 | -0.242555 |
| C  | -5.800254 | -3.273031 | -1.830503 |
| H  | -4.254562 | -4.761922 | -1.695006 |
| H  | -7.178928 | -1.625826 | -1.773745 |
| H  | -6.412594 | -3.861136 | -2.503885 |
| C  | 0.590150  | 0.050682  | 1.685461  |
| C  | 1.438149  | 0.968033  | 1.011264  |
| C  | -0.331197 | 0.568348  | 2.747971  |
| H  | 1.010356  | -0.931071 | 1.868736  |
| H  | 1.177537  | 2.018463  | 1.046189  |
| C  | 2.517634  | 0.610323  | 0.252239  |
| H  | -0.875268 | 1.454000  | 2.413068  |
| H  | -1.049264 | -0.187934 | 3.062591  |
| H  | 0.257229  | 0.855078  | 3.627001  |
| O  | 2.803133  | -0.691571 | 0.061655  |
| Si | 3.986086  | -1.733347 | 0.715734  |
| C  | 3.705717  | -1.847494 | 2.558435  |
| C  | 5.693863  | -1.051200 | 0.396675  |
| C  | 3.671352  | -3.368325 | -0.182998 |
| H  | 4.501727  | -2.436557 | 3.023747  |
| H  | 3.729592  | -0.854106 | 3.016131  |
| H  | 2.751707  | -2.314031 | 2.812722  |
| H  | 6.440739  | -1.709539 | 0.851048  |

|   |          |           |           |
|---|----------|-----------|-----------|
| H | 5.924397 | -0.965666 | -0.666668 |
| H | 5.814757 | -0.063495 | 0.849893  |
| C | 4.660583 | -4.421524 | 0.341109  |
| H | 4.490315 | -5.377473 | -0.167093 |
| H | 5.700592 | -4.136509 | 0.158144  |
| H | 4.543147 | -4.597767 | 1.414313  |
| C | 3.876294 | -3.192054 | -1.694286 |
| H | 3.178645 | -2.463625 | -2.115647 |
| H | 4.892115 | -2.867294 | -1.935873 |
| H | 3.706912 | -4.145588 | -2.207859 |
| C | 2.237726 | -3.852863 | 0.074457  |
| H | 2.067981 | -4.805887 | -0.439905 |
| H | 2.044408 | -4.017636 | 1.138088  |
| H | 1.497575 | -3.140791 | -0.298846 |
| C | 3.340676 | 1.587432  | -0.484262 |
| C | 3.982278 | 1.205818  | -1.666017 |
| C | 3.484079 | 2.905980  | -0.037537 |
| C | 4.731556 | 2.120945  | -2.390148 |
| C | 4.240202 | 3.815874  | -0.759533 |
| C | 4.864304 | 3.428598  | -1.940209 |
| H | 5.212627 | 1.811749  | -3.310769 |
| H | 4.349819 | 4.830507  | -0.394802 |
| H | 3.021288 | 3.217460  | 0.890693  |
| H | 3.876402 | 0.190146  | -2.024054 |
| H | 5.454044 | 4.142068  | -2.503713 |

### TS-AD\_Ph\_2c

SMD(DCE)-CAM-B3LYP/6-311+G(d,p)

E = -2627.018844

Zero-point correction = 0.607124 (Hartree/Particle)

Thermal correction to Energy = 0.647788

Thermal correction to Enthalpy = 0.648732

Thermal correction to Gibbs Free Energy = 0.527551

Sum of electronic and zero-point Energies = -2626.411719

Sum of electronic and thermal Energies = -2626.371056

Sum of electronic and thermal Enthalpies = -2626.370112

Sum of electronic and thermal Free Energies = -2626.491293

|   |           |           |           |
|---|-----------|-----------|-----------|
| C | -0.281368 | -0.656972 | 0.448372  |
| H | -0.199443 | -1.725809 | 0.598808  |
| H | 0.329165  | -0.231494 | -0.335297 |
| C | -1.518599 | -0.088578 | 0.682573  |
| S | -1.757411 | 1.618415  | 0.262418  |
| O | -1.813197 | 2.431791  | 1.477268  |
| O | -0.717677 | 1.925660  | -0.724060 |
| S | -2.776746 | -1.004140 | 1.514274  |
| O | -2.116423 | -2.141287 | 2.160774  |
| O | -3.598296 | -0.102529 | 2.319881  |
| C | -3.337499 | 1.755266  | -0.552666 |
| C | -4.401211 | 2.331012  | 0.125910  |
| C | -3.448605 | 1.336497  | -1.873306 |
| C | -5.609382 | 2.489727  | -0.539368 |
| H | -4.279299 | 2.652068  | 1.151500  |
| C | -4.661710 | 1.496908  | -2.524023 |

|    |           |           |           |
|----|-----------|-----------|-----------|
| H  | -2.600355 | 0.901498  | -2.386900 |
| C  | -5.738062 | 2.073728  | -1.858127 |
| H  | -6.448797 | 2.941987  | -0.025475 |
| H  | -4.764921 | 1.177792  | -3.553872 |
| H  | -6.682858 | 2.201578  | -2.373261 |
| C  | -3.828654 | -1.677254 | 0.231532  |
| C  | -3.286155 | -2.553883 | -0.701028 |
| C  | -5.175855 | -1.353266 | 0.230215  |
| C  | -4.118533 | -3.112154 | -1.657403 |
| H  | -2.231618 | -2.800226 | -0.683111 |
| C  | -6.001358 | -1.925699 | -0.729878 |
| H  | -5.570175 | -0.668847 | 0.969318  |
| C  | -5.474494 | -2.799097 | -1.670610 |
| H  | -3.709934 | -3.796091 | -2.391317 |
| H  | -7.057277 | -1.684464 | -0.740160 |
| H  | -6.121625 | -3.241173 | -2.418932 |
| C  | 1.124322  | -0.242077 | 1.941572  |
| C  | 1.838190  | 0.886888  | 1.459787  |
| C  | 0.345954  | -0.110574 | 3.215531  |
| H  | 1.593683  | -1.204394 | 1.774482  |
| H  | 1.531327  | 1.866083  | 1.807101  |
| C  | 2.826324  | 0.831624  | 0.517832  |
| H  | -0.264292 | 0.795071  | 3.220203  |
| H  | -0.299978 | -0.970996 | 3.385420  |
| H  | 1.043893  | -0.043800 | 4.057952  |
| O  | 3.151490  | -0.348109 | -0.048600 |
| C  | 3.497720  | 2.029999  | -0.017864 |
| Si | 4.453974  | -1.424315 | 0.182898  |
| C  | 3.611533  | 3.203551  | 0.735881  |
| C  | 4.020088  | 2.012746  | -1.314290 |
| C  | 4.325854  | -2.140595 | 1.902940  |
| C  | 6.076046  | -0.515235 | 0.019592  |
| C  | 4.196581  | -2.720473 | -1.172005 |
| C  | 4.222651  | 4.326997  | 0.202388  |
| H  | 3.237263  | 3.233755  | 1.751476  |
| C  | 4.624460  | 3.141171  | -1.848019 |
| H  | 3.934051  | 1.113220  | -1.909572 |
| H  | 5.193056  | -2.774639 | 2.110838  |
| H  | 4.319693  | -1.345684 | 2.654474  |
| H  | 3.427739  | -2.745816 | 2.043037  |
| H  | 6.903376  | -1.201961 | 0.223582  |
| H  | 6.228026  | -0.091769 | -0.974694 |
| H  | 6.144431  | 0.298196  | 0.747233  |
| C  | 4.729224  | 4.302153  | -1.092422 |
| H  | 4.308924  | 5.225356  | 0.802345  |
| H  | 5.012939  | 3.114274  | -2.859469 |
| H  | 5.205015  | 5.182614  | -1.508133 |
| C  | 4.267351  | -2.063489 | -2.557735 |
| H  | 4.130061  | -2.821388 | -3.337825 |
| H  | 3.486077  | -1.310489 | -2.689687 |
| H  | 5.233619  | -1.583579 | -2.735951 |
| C  | 5.301402  | -3.783217 | -1.060932 |
| H  | 5.281176  | -4.297983 | -0.095989 |

|   |          |           |           |
|---|----------|-----------|-----------|
| H | 5.166709 | -4.543312 | -1.838973 |
| H | 6.299090 | -3.354957 | -1.193623 |
| C | 2.828870 | -3.398402 | -1.008605 |
| H | 2.688631 | -4.150405 | -1.793842 |
| H | 2.736602 | -3.910364 | -0.046753 |
| H | 2.009216 | -2.679843 | -1.089752 |

### TS-AD\_Ph\_2d

SMD(DCE)-CAM-B3LYP/6-311+G(d,p)

E = -2627.020143

Zero-point correction = 0.607129 (Hartree/Particle)

Thermal correction to Energy = 0.647760

Thermal correction to Enthalpy = 0.648704

Thermal correction to Gibbs Free Energy = 0.527898

Sum of electronic and zero-point Energies = -2626.413014

Sum of electronic and thermal Energies = -2626.372383

Sum of electronic and thermal Enthalpies = -2626.371438

Sum of electronic and thermal Free Energies = -2626.492244

|   |           |           |           |
|---|-----------|-----------|-----------|
| C | 0.749586  | -0.744269 | -0.312750 |
| H | 0.748629  | -1.808236 | -0.113150 |
| H | 0.085367  | -0.149332 | 0.300354  |
| C | 1.946470  | -0.192754 | -0.716934 |
| S | 2.162282  | 1.559933  | -0.777353 |
| O | 3.593652  | 1.832359  | -0.909133 |
| O | 1.245407  | 2.134101  | -1.763699 |
| S | 3.256239  | -1.241465 | -1.291099 |
| O | 2.724260  | -2.605714 | -1.210653 |
| O | 3.769604  | -0.765895 | -2.573814 |
| C | 1.632936  | 2.130393  | 0.832889  |
| C | 2.425406  | 1.842415  | 1.937638  |
| C | 0.461925  | 2.863311  | 0.943624  |
| C | 2.026439  | 2.300806  | 3.182938  |
| H | 3.341156  | 1.274211  | 1.827706  |
| C | 0.074315  | 3.319404  | 2.197670  |
| H | -0.127766 | 3.080948  | 0.063013  |
| C | 0.852366  | 3.036747  | 3.311818  |
| H | 2.633736  | 2.086772  | 4.053926  |
| H | -0.836387 | 3.896893  | 2.299198  |
| H | 0.546052  | 3.393927  | 4.287938  |
| C | 4.572545  | -1.121279 | -0.089679 |
| C | 4.456463  | -1.831926 | 1.098833  |
| C | 5.690631  | -0.353356 | -0.377092 |
| C | 5.488140  | -1.762443 | 2.022723  |
| H | 3.580083  | -2.436833 | 1.294779  |
| C | 6.719220  | -0.297827 | 0.553413  |
| H | 5.747498  | 0.190391  | -1.309629 |
| C | 6.616763  | -0.997199 | 1.749334  |
| H | 5.414335  | -2.312899 | 2.952686  |
| H | 7.601170  | 0.294353  | 0.341726  |
| H | 7.422635  | -0.949090 | 2.472310  |
| C | -0.660936 | -0.957732 | -1.866103 |
| C | -1.474168 | 0.198518  | -1.760828 |
| C | 0.150196  | -1.161488 | -3.108755 |

|    |           |           |           |
|----|-----------|-----------|-----------|
| H  | -1.049115 | -1.857500 | -1.403881 |
| H  | -1.207226 | 1.054301  | -2.367462 |
| C  | -2.511958 | 0.340068  | -0.881076 |
| H  | 0.676057  | -0.249679 | -3.397243 |
| H  | 0.873288  | -1.968511 | -2.994270 |
| H  | -0.518398 | -1.432972 | -3.933763 |
| O  | -2.798334 | -0.647499 | -0.008879 |
| C  | -3.291502 | 1.584847  | -0.748285 |
| Si | -3.987063 | -1.870663 | 0.010618  |
| C  | -3.400376 | 2.498087  | -1.804163 |
| C  | -3.925453 | 1.883209  | 0.461747  |
| C  | -3.757544 | -2.943923 | -1.500084 |
| C  | -5.691219 | -1.110056 | -0.034064 |
| C  | -3.637063 | -2.786978 | 1.629209  |
| C  | -4.114666 | 3.674973  | -1.647610 |
| H  | -2.940573 | 2.280360  | -2.760031 |
| C  | -4.634804 | 3.064981  | 0.616885  |
| H  | -3.846484 | 1.188867  | 1.287710  |
| H  | -4.566693 | -3.677655 | -1.563636 |
| H  | -3.795221 | -2.342099 | -2.412856 |
| H  | -2.811331 | -3.488753 | -1.493550 |
| H  | -6.445248 | -1.902826 | -0.060490 |
| H  | -5.897816 | -0.479017 | 0.832164  |
| H  | -5.827278 | -0.504403 | -0.934214 |
| C  | -4.733252 | 3.965403  | -0.436312 |
| H  | -4.195101 | 4.366431  | -2.478214 |
| H  | -5.112283 | 3.283726  | 1.565017  |
| H  | -5.291295 | 4.886610  | -0.316667 |
| C  | -3.807212 | -1.839101 | 2.824885  |
| H  | -3.610125 | -2.377396 | 3.759329  |
| H  | -3.111006 | -0.997632 | 2.777141  |
| H  | -4.821703 | -1.436150 | 2.888577  |
| C  | -4.628331 | -3.953616 | 1.765139  |
| H  | -4.532660 | -4.671605 | 0.945470  |
| H  | -4.439285 | -4.496505 | 2.698246  |
| H  | -5.666373 | -3.610059 | 1.792755  |
| C  | -2.205301 | -3.340720 | 1.629881  |
| H  | -2.014363 | -3.881185 | 2.564324  |
| H  | -2.035219 | -4.041241 | 0.807683  |
| H  | -1.462941 | -2.542193 | 1.553657  |
